# Supplementary material for: Cardiovascular mortality in bipolar disorder: a population-based cohort study in Sweden
Source: PubMed Central journal article supplement — BMJ Open. 2013 Apr 18;3(4):e002373. doi: 10.1136/bmjopen-2012-002373 (PMC3641504; doi:10.1136/bmjopen-2012-002373), 2013-04-18
Supplement: bmjopen-2012-002373.draft_revisions.pdf [file bmjopen-2012-002373.draft_revisions.pdf]

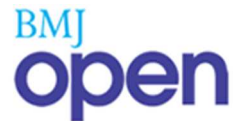

**Cardiovascular mortality in bipolar disorder: A population based cohort study in Sweden**

|                                 |                                                                                                                                                                                                                                                                                                                                                                                                                                                                           |
|---------------------------------|---------------------------------------------------------------------------------------------------------------------------------------------------------------------------------------------------------------------------------------------------------------------------------------------------------------------------------------------------------------------------------------------------------------------------------------------------------------------------|
| Journal:                        | <i>BMJ Open</i>                                                                                                                                                                                                                                                                                                                                                                                                                                                           |
| Manuscript ID:                  | bmjopen-2012-002373                                                                                                                                                                                                                                                                                                                                                                                                                                                       |
| Article Type:                   | Research                                                                                                                                                                                                                                                                                                                                                                                                                                                                  |
| Date Submitted by the Author:   | 19-Nov-2012                                                                                                                                                                                                                                                                                                                                                                                                                                                               |
| Complete List of Authors:       | Westman, Jeanette; Karolinska Institutet, Centre for family medicine (CeFAM)<br>Hällgren, Jonas; Karolinska Institutet, Department of Medical epidemiology and biostatistics (MEB)<br>Wahlbeck, Kristian; THL National Institute for health and welfare, Erlinge, David; Lunds Universitet, Department of Cardiology<br>Alfredsson, Lars; Karolinska institutet, institute of environmental medicine<br>Ösby, Urban; Karolinska Institutet, Center for molecular medicine |
| <b>Primary Subject Heading</b>: | Mental health                                                                                                                                                                                                                                                                                                                                                                                                                                                             |
| Secondary Subject Heading:      | Mental health, Cardiovascular medicine, Public health, Epidemiology, Neurology                                                                                                                                                                                                                                                                                                                                                                                            |
| Keywords:                       | EPIDEMIOLOGY, PSYCHIATRY, CARDIOLOGY, Coronary heart disease < CARDIOLOGY, Myocardial infarction < CARDIOLOGY, Stroke < NEUROLOGY                                                                                                                                                                                                                                                                                                                                         |
|                                 |                                                                                                                                                                                                                                                                                                                                                                                                                                                                           |

SCHOLARONE™  
Manuscripts

Only

## Cardiovascular mortality in bipolar disorder: A population based cohort study in Sweden.

Jeanette Westman *Postdoctoral researcher*<sup>1</sup>, Jonas Hällgren *Statistician*<sup>2</sup>, Kristian Wahlbeck *Professor of psychiatry*<sup>3</sup>, David Erlinge *Professor of cardiology*<sup>4</sup>, Lars Alfredsson *Professor of epidemiology*<sup>5</sup>, Urban Ösby *Senior researcher*<sup>1,6,7</sup>

<sup>1</sup>Centre for Family Medicine (CeFAM), Department of Neurobiology, Care Sciences, and Society, Karolinska Institutet, Stockholm, Sweden.

<sup>2</sup>Department of Medical Epidemiology and Biostatistics (MEB), Karolinska Institutet, Stockholm, Sweden.

<sup>3</sup>THL, National Institute for Health and Welfare, Helsinki, Finland.

<sup>4</sup>Department of Cardiology, Lunds University, Lund, Sweden

<sup>5</sup>Institute of Environmental Medicine, Karolinska Institutet, Stockholm, Sweden.

<sup>6</sup>Department of Molecular Medicine and Surgery, Neurogenetics, Karolinska Institutet, Stockholm, Sweden.

<sup>7</sup>Center for Molecular Medicine, Karolinska Institutet, Stockholm, Sweden.

Correspondence: Jeanette Westman, PhD  
Alfred Nobels Allé 12, SE 141 83 Huddinge, Sweden  
Email: [jeanette.westman@ki.se](mailto:jeanette.westman@ki.se)  
Telephone: +46-(0)8-524 800 00  
Fax: +4-(0)8-524 887 06

Word count of text: 2471

## Article summary

### Article focus

- To estimate mortality in cardiovascular disease and its subgroups cerebrovascular and coronary heart disease and acute myocardial infarction among 17,101 persons diagnosed with bipolar disorder during 1987 to 2006 in Sweden compared to the general population in a national register study with a 20-year follow-up.

### Key messages

- Persons with bipolar disorder died of CVD approximately ten years early. Excess mortality from CVD and other somatic diseases was three times higher (1,812 deaths) than suicide and other unnatural causes (675 deaths). MRRs for cerebrovascular disease, coronary heart disease, and acute myocardial infarction, were twice as high compared to the general population. Despite the increased mortality, hospital admissions for CVD treatment were only slightly increased.
- The increased cardiovascular mortality in persons with bipolar disorder calls for more resources to prevent and treat somatic diseases. Specifically, our findings imply that it would be critical to ensure that persons with bipolar disorder receive the same quality care for CVD as the population.

### Strengths and limitations of this study

- A large cohort with comprehensive data on patient characteristics was studied. Mortality data from the Swedish cause of death register are of high quality.
- Clinical information on symptoms and treatment were lacking.

1  
2  
3 **ABSTRACT** (word count: 261)

4 **Objective:** To estimate cardiovascular mortality among persons with bipolar disorder in  
5 Sweden compared to the general population.

6  
7 **Design:** Population register based cohort study with a 20-year follow-up.

8  
9 **Setting:** Sweden.

10  
11 **Participants:** The entire population of Sweden (n=10.6 million) of whom 17,101 persons  
12 were diagnosed with bipolar disorder between 1987 and 2006.

13  
14 **Main outcome measures:** Mortality rate ratios (MRR), excess mortality (excess deaths),  
15 cardiovascular disorders (CVD) and specifically cerebrovascular disease, coronary heart  
16 disease, and acute myocardial infarction, hospital admission rate ratios (ARR).

17  
18 **Results:** Persons with bipolar disorder died of CVD approximately ten years earlier than did  
19 persons of the general population. More than two thirds (73%) of all deaths in persons with  
20 bipolar disorder were caused by CVD and other somatic diseases, whereas suicide and other  
21 unnatural causes accounted for less than a third of all deaths (27%). Excess mortality of CVD  
22 and other somatic diseases was three times higher (1,812 deaths) than that of suicide and other  
23 unnatural causes (675 deaths). MRRs for cerebrovascular disease, coronary heart disease, and  
24 acute myocardial infarction, were twice as high in persons with bipolar disorder compared to  
25 the general population. Despite the increased mortality of CVD, ARRs for CVD treatment  
26 were only slightly increased in persons with bipolar disorder when compared to the general  
27 population.

28  
29 **Conclusions:** The increased cardiovascular mortality in persons with bipolar disorder calls  
30 for more resources to prevent and treat somatic diseases in this group. Specifically, our  
31 findings further imply that it would be critical to ensure that persons with bipolar disorder  
32 receive the same quality care for CVD as persons without bipolar disorder.  
33  
34  
35  
36  
37  
38  
39  
40  
41  
42  
43  
44  
45  
46  
47  
48  
49  
50  
51  
52  
53  
54  
55  
56  
57  
58  
59  
60

## Introduction

Cardiovascular disease (CVD) is the main cause of death in many developed countries.<sup>1</sup> CVD encompasses a broad range of different conditions that are potentially life threatening. In Sweden, although mortality from CVD in the population has almost halved in the last two decades, CVD still accounts for more than 40% of all deaths in the country.<sup>2</sup> Premature death in patients with severe mental health disorders, especially patients with schizophrenia and bipolar disorder, has been generally attributed to suicide rather than CVD, despite studies showing that CVD leads to shorter life spans than does suicide in those patients.<sup>3</sup> Persons with bipolar disorder have an increased risk of CVD and have been observed to die due to CVD twice as often as the general population.<sup>4-6</sup> Although previous studies have shown an association between bipolar disorder and mortality from CVD, few studies have addressed mortality rates in different CVD subgroups, or examined their use of health care. An improved understanding of the causes behind and magnitude of CVD among bipolar patients is warranted along with an in-depth evaluation of different diagnostic CVD subgroups. The answers to these questions, which are far less investigated than among patients with schizophrenia, are essential in the efforts to address the problem of premature deaths due to CVD in bipolar patients.

The aim of this study was to evaluate excess mortality from CVD, such as cerebrovascular disease and coronary heart disease with acute myocardial infarction as its most important component, and also CVD hospitals admissions, in people with bipolar disorder in Sweden between 1987 and 2006 compared to the population.

## Methods

### Cohort and follow-up

All persons who resided in Sweden between the 1<sup>st</sup> of January 1987 and the 31<sup>st</sup> of December 2006 (n=10,631, 208) were identified using the Swedish Total Population Register (TPR). The TPR was established in 1968 and contains information on sex, date and place of birth, date of migration of every resident in Sweden. Information on hospital admission, medical diagnosis, and cause of death was obtained by linking the TRP with the national Swedish Cause-of-Death Register and the National Patient Register (NPR) using each resident's unique personal identification number.

The NPR, which is maintained by the National Board of Health and Welfare, contains information on all hospital in-patient treatments carried out in Sweden since 1987. For psychiatric in-patient care the register has nationwide coverage dating back from 1973. For each hospitalization, the unique national registration number, date of admission and discharge, and diagnosis are registered in NPR. In Sweden, all hospital diagnoses are classified according to the WHO International Classification of Diseases (ICD). Since the diagnostic definitions of affective disorders were substantially changed in ICD-9 and ICD-10 as compared with ICD-8, only patients diagnosed with bipolar disorder according to ICD-9 or ICD-10 were included in the study. Bipolar diagnoses recorded between 1987 and 1996 were identified using ICD-9 (296A, C, E, 298B). From 1997 and later, ICD-10 (F30-F31) was used to identify bipolar diagnoses. The Swedish Cause of Death Register (CDR) includes all individuals who were registered in Sweden at the time of death. The register provides information on date of death as well as main (underlying) and secondary causes of death based on death certificates. Definitions regarding causes of death and ICD codes used in this study are shown in Figure 1.

A total of 20,248 patients admitted to hospital between 1<sup>st</sup> of January 1987 and 31<sup>st</sup> of December 2006 with a main diagnosis of bipolar disorder (ICD-9; ICD-10) were identified in the NPR. Of the 20,248 patients, 3,147 had been previously diagnosed with schizophrenia (ICD-8: 295; ICD-9: 295; ICD-10; F20, F25) and were consequently excluded. Thus, the total risk population of the study comprised 17,101 patients with bipolar disorder.

1  
2  
3 The follow-up period was 20 years (1987-2006). Immigrants were included from the date of  
4 immigration to Sweden. Each person was followed until December 31, 2006, or date of death  
5 or emigration, depending on which came first. Inclusion in the risk population started from  
6 the date of first hospital admission (discharge diagnosis) during the study period.  
7  
8  
9

### 10 11 **Statistical analysis**

12 Person years at risk, number of cause-specific deaths and hospital admissions due to CVD for  
13 both bipolar patients and the general population were determined. Person time was stratified  
14 by sex, calendar year and age. Mortality rate ratios (MRR) and Admission rate ratios (ARR)  
15 and predicted mortality rates were calculated with corresponding 95% confidence intervals  
16 (CI) using Poisson regression models with the GENMOD procedure using statistical software  
17 SAS (version 9.2). All models were adjusted for or stratified by sex, attained age and year of  
18 follow-up.  
19  
20  
21  
22  
23  
24  
25

26 To calculate the excess mortality for patients with bipolar disorder the observed number of  
27 deaths was compared with the expected number of deaths among patients with bipolar  
28 disorder. The expected number of deaths was calculated by applying age, sex and calendar  
29 specific mortality rates in the general population to the time at risk among the patients.  
30  
31

32 The risk of dying from CVD after first hospital admission was analyzed by estimating cause-  
33 specific survival curves using the Kaplan-Meier method. Additional adjusted hazard ratios  
34 with 95% CIs were estimated using Cox proportional hazard models.  
35  
36  
37  
38

39 When hospital admission due to CVD (Admission Rate Ratios, ARR) was the event of  
40 interest, follow-up ended on the day of first admission. To ensure that the observed cases  
41 were incident, a three-year run-in period was created to compensate for the lack of CVD  
42 coverage in the NPR before 1987. Hence, all bipolar patients analyzed had no hospital  
43 admissions due to CVD recorded for at least three years before follow-up.  
44  
45  
46  
47  
48

## 49 **Results**

### 50 **Causes of death**

51 Total mortality (death from any cause) between 1987 and 2006 in Sweden was more than  
52 twice as high among patients with bipolar disorder compared to the general population (MRR  
53 2.40; 95% CI 2.33-2.47). Specifically, 2,489 excess deaths in patients with bipolar disorder  
54  
55  
56  
57  
58  
59  
60

1  
2  
3 were observed (Table 1). With mortality causes subdivided into CVD, other somatic, and  
4 unnatural causes of death, we found that men and women with bipolar disorder were twice as  
5 likely to die of CVD compared to the general population (MRR 2.03; 95% CI 1.93-2.13), with  
6 824 excess deaths due to CVD. Mortality from other somatic causes was also doubled (MRR  
7 2.10; 95% CI 2.00-2.19), with 988 excess deaths. Unnatural causes of death, such as suicide  
8 and accidents, were increased more than nine times in bipolar patients (MRR 9.66; 95% CI  
9 8.99-10.37), with 675 excess deaths. As far as CVD subgroups were concerned, mortality  
10 from coronary heart disease and cerebrovascular disease was twice as high in bipolar patients,  
11 with 377 excess deaths (MRR 1.95; 95% CI 1.81-2.09) and 184 excess deaths (MRR 2.00;  
12 95% CI 1.81-2.09), respectively. Mortality from acute myocardial infarction was almost twice  
13 as high in bipolar patients (MRR 1.83; 95% CI 1.67-2.01), with 200 excess deaths. Bipolar  
14 women and men of all ages had an equally increased mortality from CVD (data not shown).  
15  
16  
17  
18  
19  
20  
21  
22  
23

### 24 **Age and cause of death**

25  
26 MRR for CVD was increased for bipolar patients across all ages but was particularly  
27 pronounced in the young age groups (Figure 2b). Patients with bipolar disorder who died of  
28 CVD were younger than people in the general population. The same finding was observed  
29 when we subdivided CVD into cerebrovascular disease, coronary heart disease and acute  
30 myocardial infarction (Figure 2e-g). For acute myocardial infarction and coronary heart  
31 disease the increased risk was most apparent in the 55-65 years age groups (2f-g). In the ages  
32 below 50 years the results should be interpreted with caution because there were very few  
33 events in these ages. Death by suicide and other unnatural deaths were 15 times more  
34 common among bipolar patients below 30 years of age compared to persons of the same age  
35 in the general population (Figure 2d). Overall, the MRR for suicide and other unnatural deaths  
36 decreased with increasing age. However, it should be noted that it remained significantly  
37 increased in persons aged between 70-74 years (MRR 6.88; CI 95% 5.06-9.35) (Figure 2d).  
38  
39  
40  
41  
42  
43  
44  
45  
46  
47

### 48 **Admission rates**

49  
50 Hospital admission rates for CVD among patients with bipolar disorder were similar to those  
51 for the general population even though MRR for CVD was almost twice as high, independent  
52 of the specific CVD cause (Tables 1 and 2). Survival rates five years after first hospital  
53 admission for CVD were significantly lower among bipolar patients than among the general  
54 population (Figure 4).  
55  
56  
57  
58  
59  
60



## Discussion

### Key findings

In this nationwide study of mortality among persons with bipolar disorder in Sweden compared to the population, somatic illness was the main cause of death. Bipolar patients died of CVD around ten years earlier than the general population. Mortality from cerebrovascular disease, coronary heart disease, and acute myocardial infarction was twice as high in bipolar patients as in the general population, while the frequency of hospital admissions due to these diseases was not increased. Our findings clearly showed that CVD and other somatic diseases in persons with bipolar disorder accounted for a substantial number of excess deaths (n=1,812), larger than suicide and other unnatural causes of death (n=675).

### Strengths and limitations

The Swedish National Patient Register and Cause of Death Register include everyone who resides in the country and are considered unique, comprehensive and highly credible. Currently more than 99% of all somatic and psychiatric hospital discharges are recorded in the National Patient Register.<sup>7</sup> Swedish hospitals and government agencies are obliged by law to enter medical information in the National Patient Register. All diagnoses in the National Patient and Cause of Death registers were given by patients' doctors using international classification standards (ICD codes). Being register based, this study used information about clinical diagnoses from hospital admissions in Sweden. During the study period, the ICD diagnostic definitions were specific for bipolar disorder. A validation of the Swedish clinical bipolar diagnoses has shown high validity, sufficient for epidemiological studies.<sup>8</sup> One limitation of this study was that it was based on in-patient diagnoses, which may have generated a selective bias towards severely ill patients. However, most individuals at severe stages of bipolar disorder are admitted to hospital in Sweden. In a previous study, we have shown that the number and frequency of hospital admissions due to bipolar disorder remained relatively unchanged in Sweden during recent years, while the overall number of psychiatric admissions was drastically reduced.<sup>9</sup> We did not have access to medical records or information on medical treatment, which would have been of interest since antidepressants use have been linked to increased risk of fatal coronary heart disease.<sup>10</sup> In terms of the validity of the data on causes of death, in CVD deaths we found a slightly higher autopsy rate (28%)

1  
2  
3 among patients with bipolar disorder than in the general population (22%). It is unlikely that  
4 these small differences affected the outcome of the study.  
5  
6

### 7 8 **Findings from other studies**

9  
10 The findings of this study add to the growing body of evidence that somatic diseases,  
11 particularly CVD, contribute to a shorter lifespan among bipolar patients. Findings from  
12 several large register-based studies from different parts of the world indicate that  
13 cardiovascular disease is responsible for the majority of excess deaths, with up to 2.5-fold  
14 increased mortality.<sup>3 5 6 11-15</sup> Studies using registers from the Nordic countries have shown  
15 than bipolar patients run almost twice the risk of dying from CVD than do persons in the  
16 general population, the mechanisms for which are currently unknown.<sup>4 5</sup> Possible risk factors  
17 for the increased mortality from CVD among bipolar patients may include adverse effects of  
18 medication,<sup>16 17</sup> high levels of smoking,<sup>18</sup> unhealthy diet,<sup>19 20</sup> lack of physical activity,<sup>19</sup> and  
19 low social-economic status.<sup>21</sup> In addition, effects of genetic associations, such as those  
20 reported between Type 2 diabetes, CHD and schizophrenia,<sup>22</sup> could not be excluded. One of  
21 the most important locus of genetic polymorphism linked to bipolar disease and depression is  
22 around the ATP-activated ion-channel receptor *P2X7*.<sup>23</sup> Recently, a polymorphism in the  
23 *P2X7* gene was linked to increased risk of stroke and acute myocardial infarction,<sup>24</sup> and the  
24 same polymorphism has also recently been shown to be linked to cognitive symptoms in  
25 bipolar disorder,<sup>25</sup> indicating that common genetic factors could have effect on both  
26 cardiovascular disease and bipolar disorder.  
27  
28  
29  
30  
31  
32  
33  
34  
35  
36  
37  
38  
39

### 40 **CVD undertreated in bipolar disorder**

41 Studies of patients with bipolar disorder have shown that the patients run an increased risk of  
42 metabolic syndrome,<sup>26</sup> i.e. increased blood glucose,<sup>27</sup> and cholesterol levels,<sup>28</sup> higher blood  
43 pressure,<sup>29</sup> and higher prevalence of overweight and obesity<sup>19</sup>, closely associated with CVD.  
44 To prevent and treat metabolic disorders in patients with severe mental illnesses such as  
45 bipolar disorder, new guidelines have been drawn up for clinicians in Sweden.<sup>30</sup> However the  
46 effects of those guidelines are still to be evaluated.  
47  
48  
49  
50  
51

52  
53 Our finding that patients with bipolar disorder showed only slightly increased hospital  
54 admissions rates for CVD despite their twice as high cardiovascular mortality, strongly  
55 suggests that CVD is undertreated in bipolar patients when compared to the general  
56 population. Our register data alone cannot offer an explanation for this finding. However, the  
57  
58  
59  
60

1  
2  
3 MRR and ARR patient populations are slightly different, in the respect that the ARR patients  
4 are identified at their first index admission, while the MRR patients may have several  
5 admissions, and thus being more severely affected. Unequal access to health care (i.e.  
6 receiving cardiac treatment of lower quality) for reasons other than financial has been  
7 previously suggested as a contributor to excess CVD mortality in patients with severe mental  
8 disorders, such as schizophrenia,<sup>31</sup> and may be indicated by our findings of increased  
9 mortality after discharge from hospital compared to the population. These factors have not  
10 been studied extensively in bipolar patients. Health care in Sweden is free and is financed  
11 primarily through taxes. Therefore, it is unlikely that patients with bipolar disorder do not  
12 seek hospital care for lack of financial means.  
13  
14  
15  
16  
17  
18  
19

20  
21 Many mechanisms can contribute to the under-treatment of CVD among people with bipolar  
22 disorder. Our results indicate a failure of the health care system to identify and address the  
23 health needs of those patients, which has also been shown in other studies of people with  
24 severe mental disorders.<sup>32</sup> The levels of CVD mortality in our bipolar persons are similar to  
25 those in schizophrenia, where adverse effects of antipsychotic medication have been  
26 considered the main contributing factor. When compared with schizophrenia, a recent study  
27 of bipolar disorder in Stockholm County found only 29% of bipolar patients medicating with  
28 antipsychotics, as compared to practically all schizophrenia patients, which raises the question  
29 of the importance of adverse effects of antipsychotics in CVD.<sup>33</sup>  
30  
31  
32  
33  
34  
35  
36  
37

### 38 **Conclusions**

39 The observed number of deaths from cardiovascular diseases in patients with bipolar  
40 disorders was almost twice as the expected number when comparing with the general  
41 population, suggesting that more resources are needed for the prevention of these diseases in  
42 this patient group. Targeted interventions by effective cooperation between primary health  
43 care and psychiatric professionals would be crucial in the efforts to reduce excess CVD  
44 mortality in patients with bipolar disorder. Finally, effective cardiac treatment would ensure  
45 longevity and improved quality of life for bipolar patients.  
46  
47  
48  
49  
50  
51  
52  
53  
54  
55  
56  
57  
58  
59  
60

1  
2  
3  
4  
5  
6  
7  
8  
9  
10  
11  
12  
13  
14  
15  
16  
17  
18  
19  
20  
21  
22  
23  
24  
25  
26  
27  
28  
29  
30  
31  
32  
33  
34  
35  
36  
37  
38  
39  
40  
41  
42  
43  
44  
45  
46  
47  
48  
49  
50  
51  
52  
53  
54  
55  
56  
57  
58  
59  
60

For peer review only

1  
2  
3 **Contributors:** UÖ had the idea of the study and is guarantor of the study together with JH,  
4 who has performed the statistical analyses. JW has contributed to the design of the study and  
5 drafted the manuscript together with UÖ. KW, DE and LA have contributed to the design of  
6 the study and with revisions of the manuscript. All authors have approved the final version of  
7 the study.  
8  
9  
10

11 **Funding:** This paper was supported by Swedish Council for Working Life and Social  
12 Research (grant number FAS 2008-0885) and Stockholm County Council (Grant number PPG  
13 -20120263). The study was conducted and analyzed independently from its funders.  
14  
15

16 **Competing interests:** All authors have completed the ICMJE uniform disclosure form  
17 (available on request from the corresponding author). JW, KW, LA, DE, UÖ has declared no  
18 support from any organization for the submitted work, no financial relationship with any  
19 organizations that would have interest in the submitted work in the previous three years, and  
20 no other activities that could appear to have influenced the submitted work. UÖ has declared  
21 traveling expenses from Janssen-Cilag for attending a course in October 2012 unrelated to the  
22 study.  
23  
24  
25  
26  
27

28 **Ethical approval:** This study was approved by the ethical review board in Stockholm  
29 County. The ethical review board determined that informed consent from participating  
30 individuals was not required.  
31  
32

33 **Data sharing:** The analysis data set for this study is available from the National Board of  
34 Health and Welfare (Socialstyrelsen) in Sweden. Please contact JH for further information.  
35  
36  
37

38 **Licence for publication:** The Corresponding Author has the right to grant on behalf of all  
39 authors and does grant on behalf of all authors, an exclusive licence on a worldwide basis to  
40 the BMJ Publishing Group Ltd and its Licensees to permit this article (if accepted) to be  
41 published in BMJ editions and any other BMJ PGL products and sublicences to exploit all  
42 subsidiary rights, as set out in our licence ( [http://resources.bmj.com/bmj/authors/checklists-](http://resources.bmj.com/bmj/authors/checklists-forms/licence-for-publication)  
43 forms/licence-for-publication).  
44  
45  
46  
47  
48  
49  
50  
51  
52  
53  
54  
55  
56  
57  
58  
59  
60

Figure 1. ICD-coding and disease classification

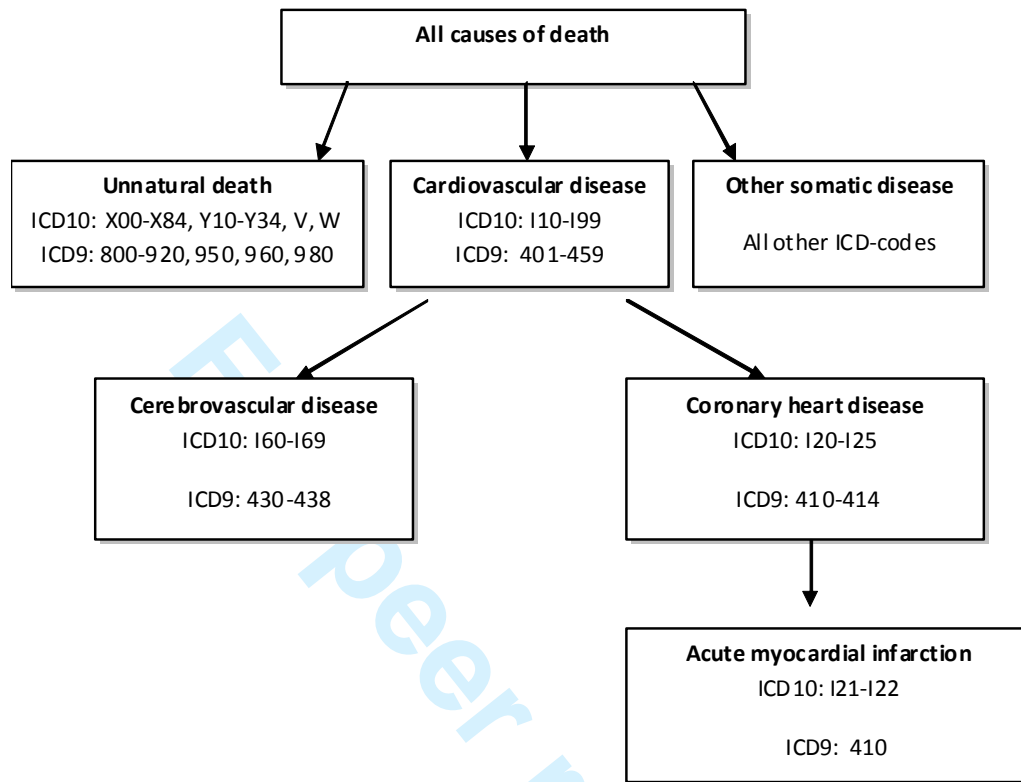

1  
2  
3  
4  
5  
6  
7  
8  
9  
10  
11  
12  
13  
14  
15  
16  
17  
18  
19  
20  
21  
22  
23  
24  
25  
26  
27  
28  
29  
30  
31  
32  
33  
34  
35  
36  
37  
38  
39  
40  
41  
42  
43  
44  
45  
46  
47  
48  
49  
50  
51  
52  
53  
54  
55  
56  
57  
58  
59  
60

Table 1. Mortality rate ratios for bipolar patients between 1987 and 2006

| Cause of death                     | Men   |                   | Women |                    | Total (both sexes) |                   |                       |
|------------------------------------|-------|-------------------|-------|--------------------|--------------------|-------------------|-----------------------|
|                                    | Cases | MRR ( 95% CI)     | Cases | MRR ( 95% CI)      | Cases              | MRR ( 95% CI)     | Excess cases (95% CI) |
| <b>All causes of death</b>         | 1874  | 2.48 (2.37-2.59)  | 2393  | 2.34 (2.25-2.44)   | 4267               | 2.40 (2.33-2.47)  | 2489 (2361-2617)      |
| <b>Cardiovascular disease</b>      | 733   | 2.16 (2.01-2.33)  | 892   | 1.93 (1.81-2.06)   | 1625               | 2.03 (1.93-2.13)  | 824 (745-903)         |
| <b>Other somatic deaths</b>        | 735   | 1.97 (1.83-2.11)  | 1154  | 2.19 (2.06-2.32)   | 1889               | 2.10 (2.00-2.19)  | 988 (902-1073)        |
| <b>Unnatural deaths</b>            | 406   | 9.37 (8.50-10.33) | 347   | 10.02 (9.01-11.13) | 753                | 9.66 (8.99-10.37) | 675 (621-729)         |
| <b>Cerebrovascular disease</b>     | 144   | 2.29 (1.94-2.70)  | 224   | 1.86 (1.63-2.12)   | 368                | 2.00 (1.81-2.22)  | 184 (147-222)         |
| <b>Coronary heart disease</b>      | 385   | 2.00 (1.81-2.21)  | 391   | 1.89 (1.71-2.09)   | 776                | 1.95 (1.81-2.09)  | 377 (323-432)         |
| <b>Acute myocardial infarction</b> | 227   | 1.89 (1.66-2.15)  | 213   | 1.78 (1.55-2.03)   | 440                | 1.83 (1.67-2.01)  | 200 (159-241)         |

view only

**Table 2. Admission rate ratios for bipolar patients during  
1990 to 2006**

| Hospital admissions         | Men   |                  | Women |                  | Total (both sexes) |                  |                       |
|-----------------------------|-------|------------------|-------|------------------|--------------------|------------------|-----------------------|
|                             | Cases | ARR (95% CI)     | Cases | ARR (95% CI)     | Cases              | ARR (95% CI)     | Excess cases (95% CI) |
| Cardiovascular disease      | 540   | 1.27 (1.16-1.38) | 696   | 1.33 (1.24-1.43) | 1236               | 1.30 (1.23-1.38) | 287 (218-356)         |
| Cerebrovascular disease     | 179   | 1.32 (1.14-1.53) | 271   | 1.43 (1.27-1.62) | 450                | 1.39 (1.26-1.52) | 125 (84-167)          |
| Coronary heart disease      | 212   | 1.02 (0.89-1.17) | 207   | 1.06 (0.92-1.21) | 419                | 1.04 (0.94-1.14) | 15 (-25-55)           |
| Acute myocardial infarction | 133   | 0.96 (0.81-1.14) | 137   | 1.11 (0.94-1.31) | 270                | 1.03 (0.92-1.16) | 8 (-24-41)            |



Figure 2a. Mortality Rate Ratios (MRR) for all causes of death by age at death in bipolar disorder patients and the general population.

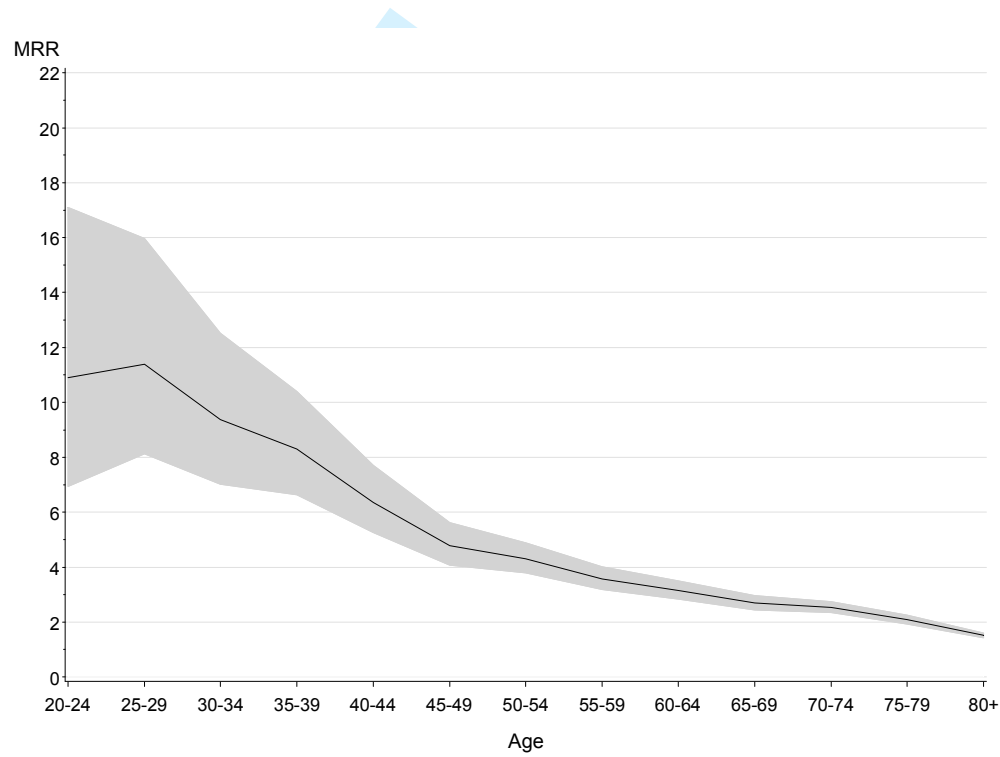

For peer review only

Figure 2b. Mortality Rate Ratios (MRR) for cardiovascular death by age at death in bipolar disorder patients and the general population.

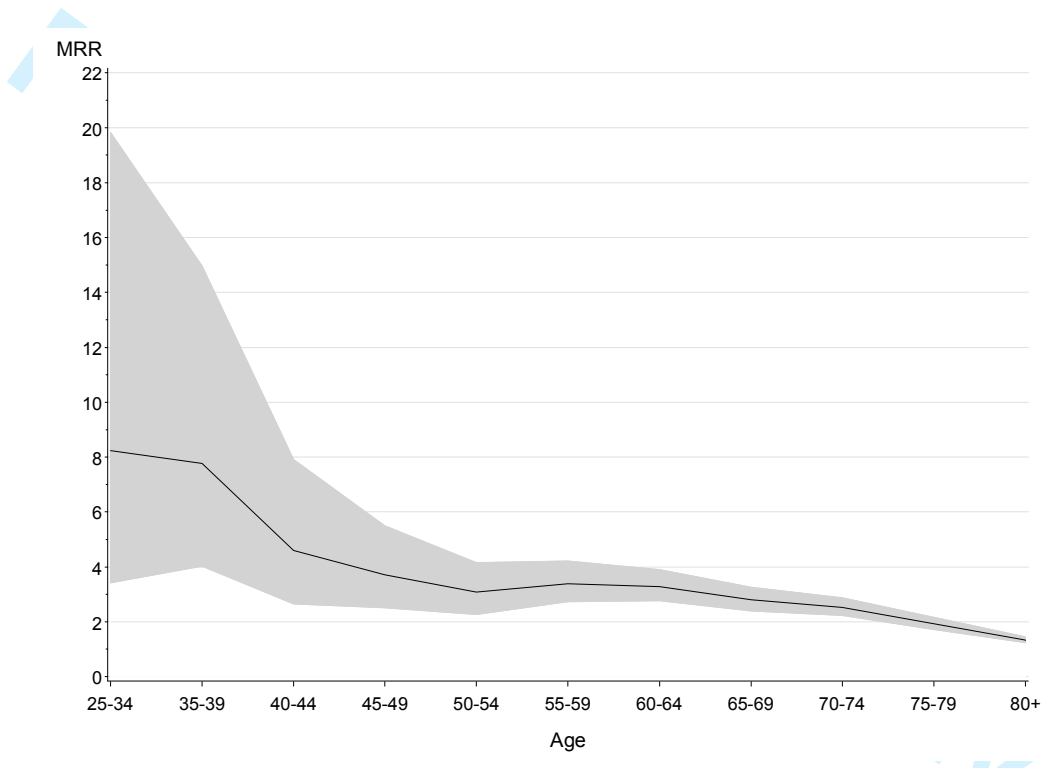

Figure 2c. Mortality Rate Ratios (MRR) for other somatic death by age at death in bipolar disorder patients and the general population.

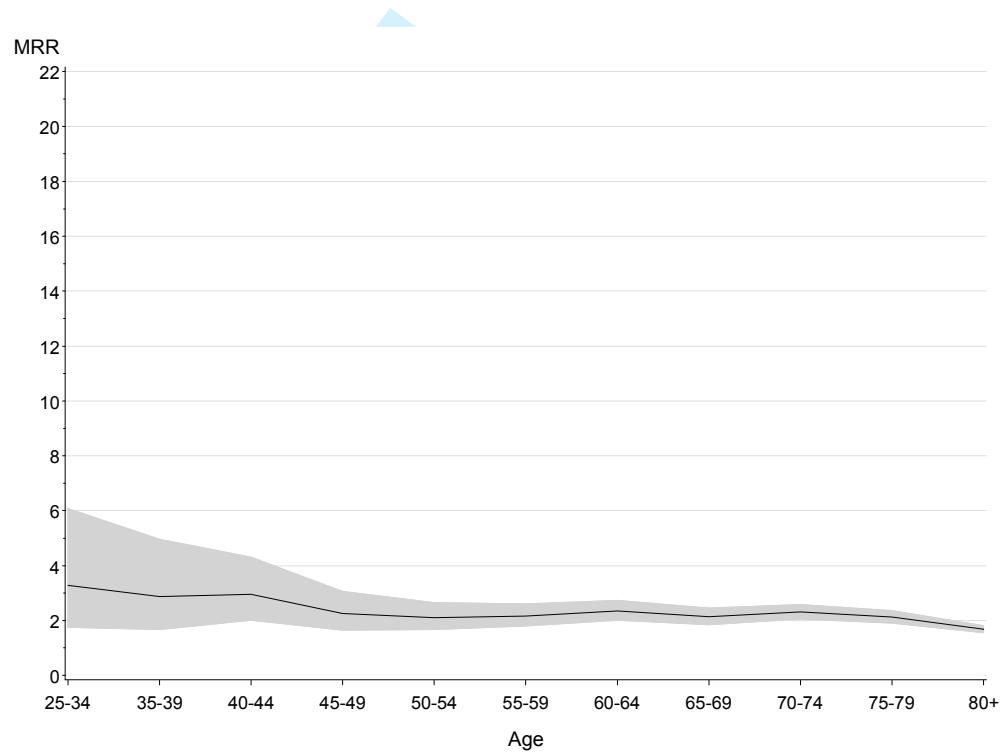

ew only

Figure 2d. Mortality Rate Ratios (MRR) of suicide and other unnatural deaths by age at death in patients with bipolar disorder and the general population.

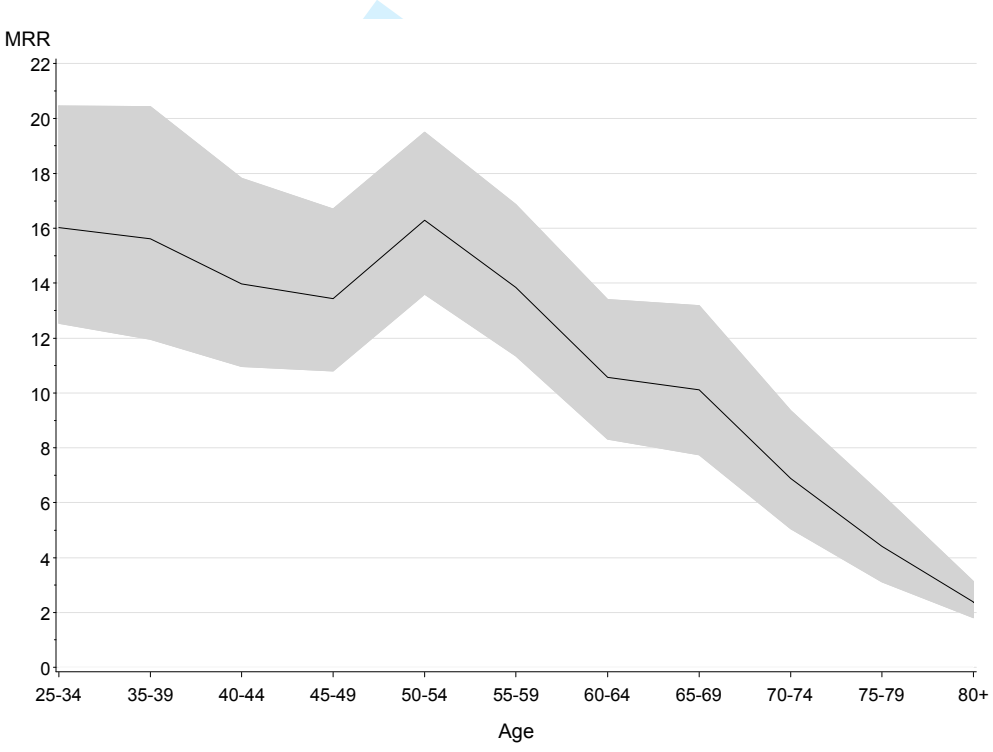

Figure 2e. Mortality Rate Ratios (MRR) of cerebrovascular disease by age at death in patients with bipolar disorder and the general population.

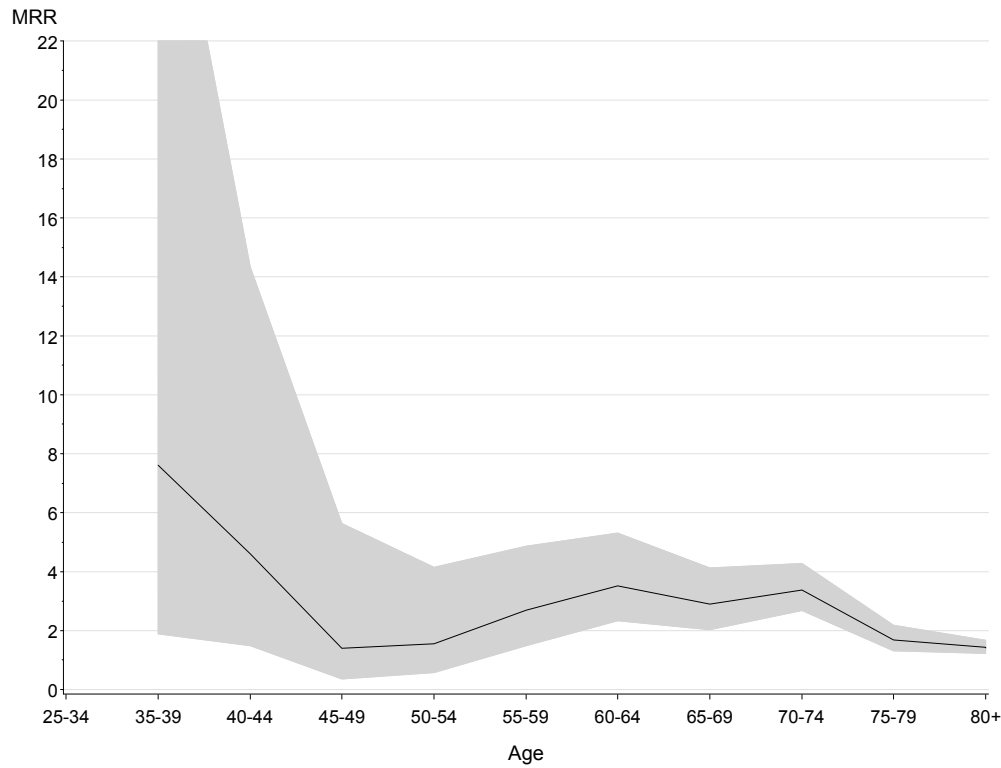

view only

Figure 2f. Mortality Rate Ratios (MRR) of coronary heart disease by age at death in patients with bipolar disorder and the general population.

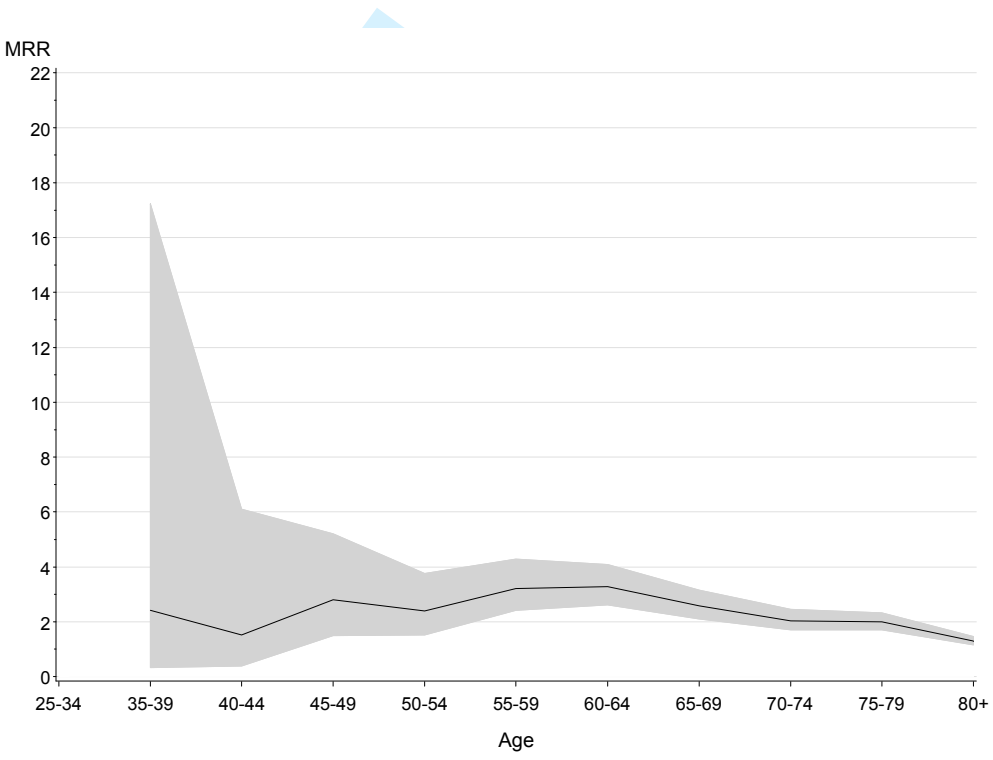

For peer review only

Figure 2g. Mortality Rate Ratios (MRR) of acute myocardial infarction by age at death in patients with bipolar disorder and the general population.

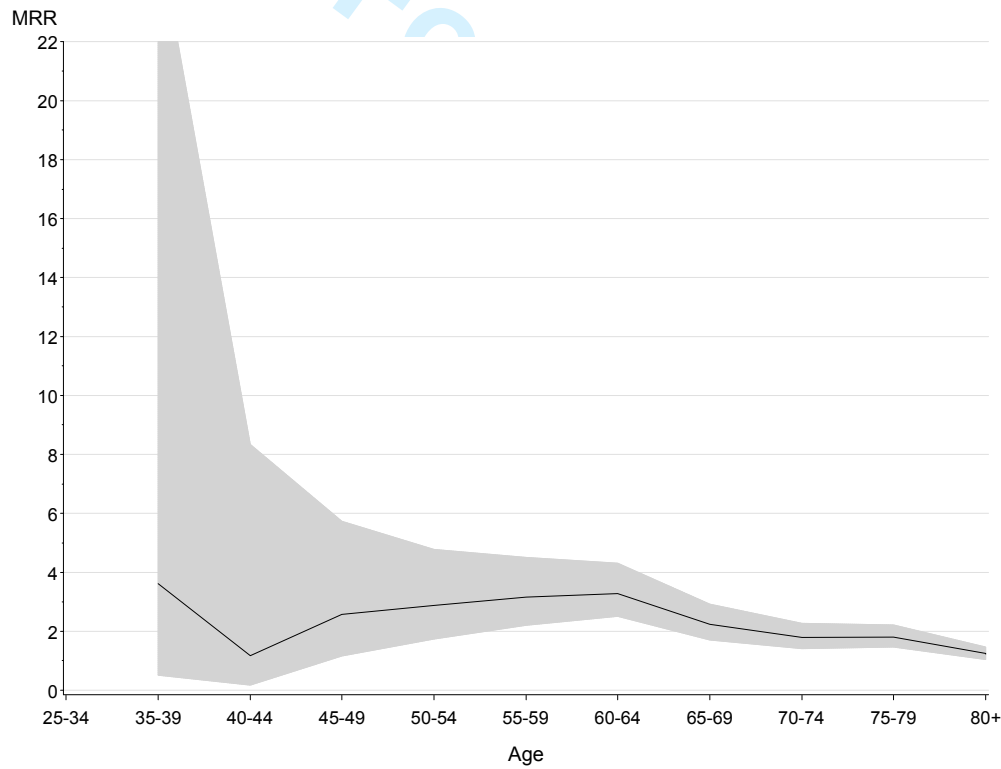

Figure 3a. Mortality of coronary heart disease per 1000 person-years in patients with bipolar disorder and the general population adjusting for sex and calendar year.

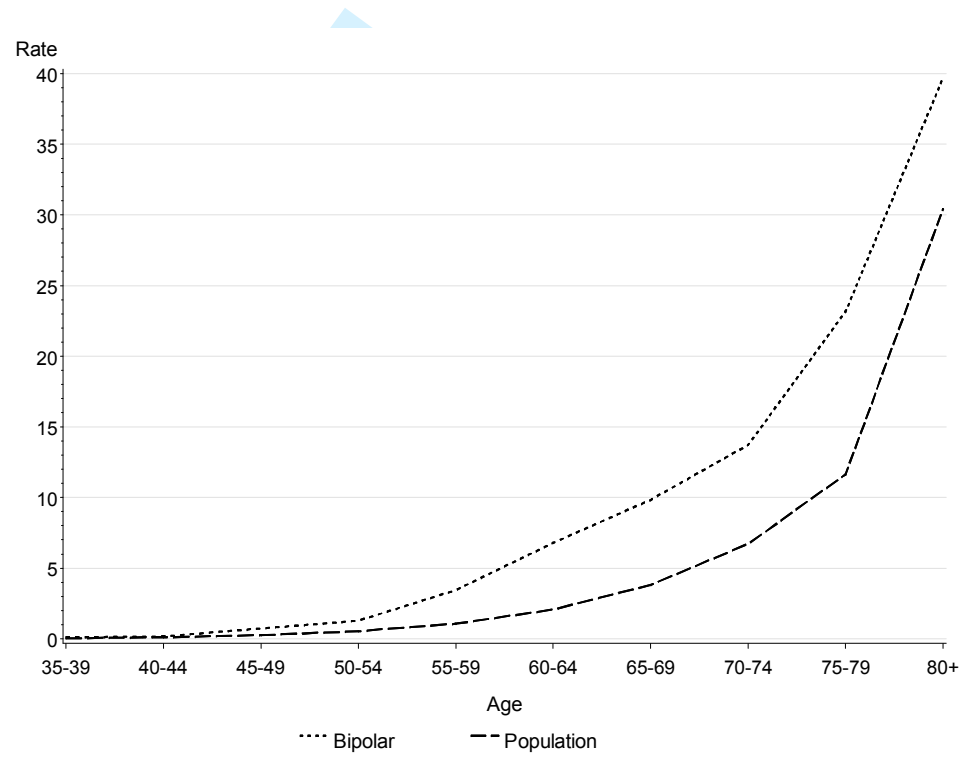

View Only



Figure 3b. Acute myocardial infarction

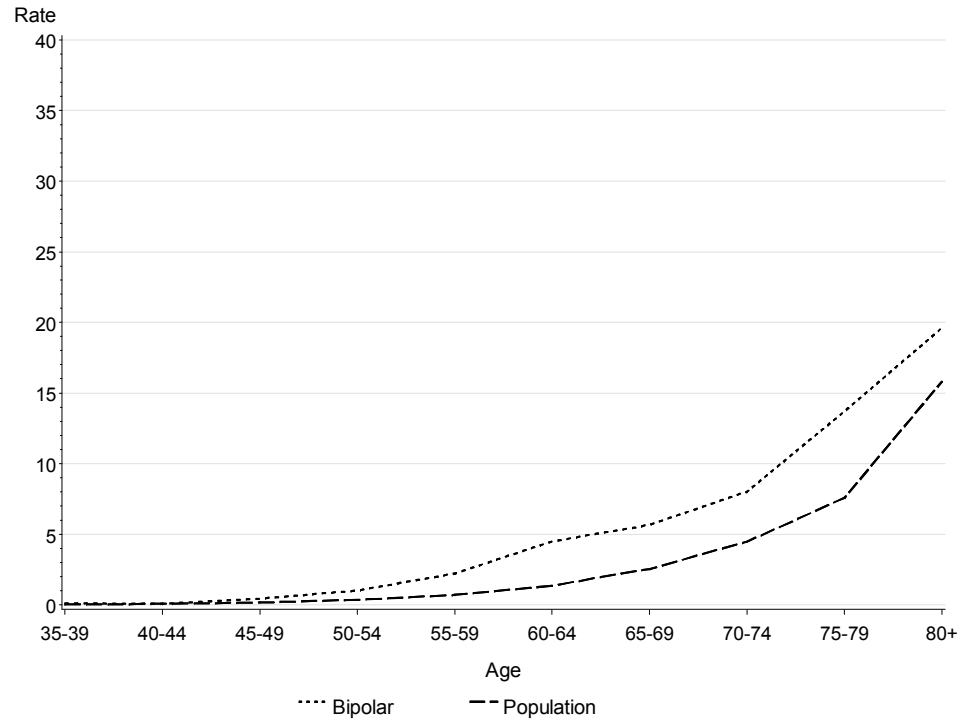

Figure 3c. Cerebrovascular disease

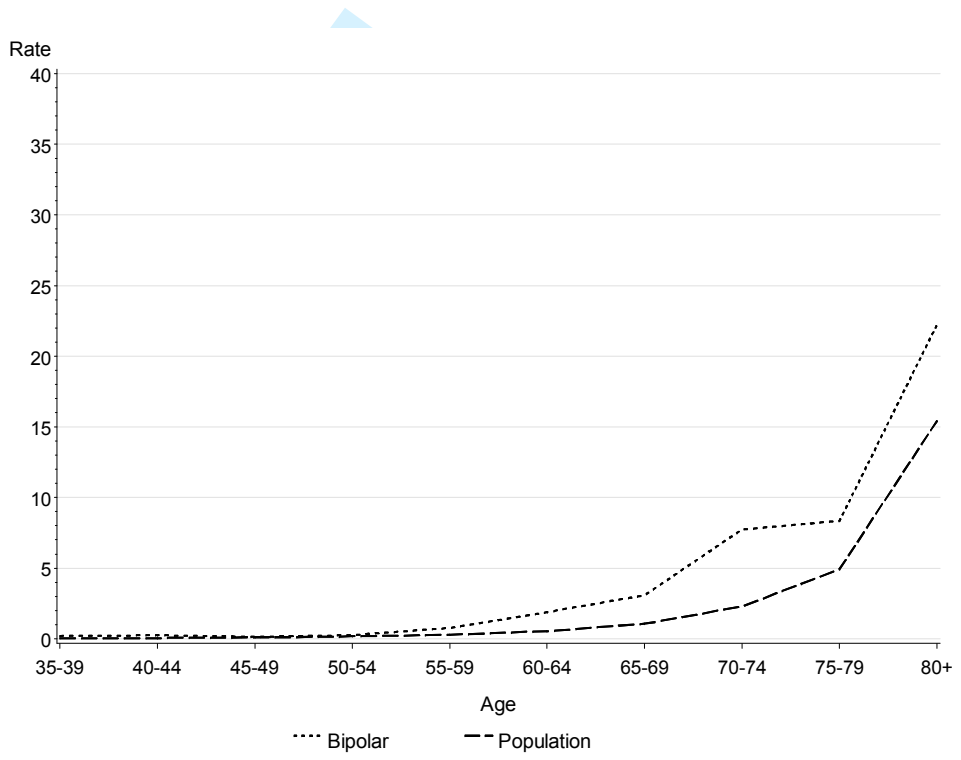

For peer review only

Figure 4. Five-year survival of cardiovascular disease after discharge from first cardiovascular admission stratified by age at hospital contact.

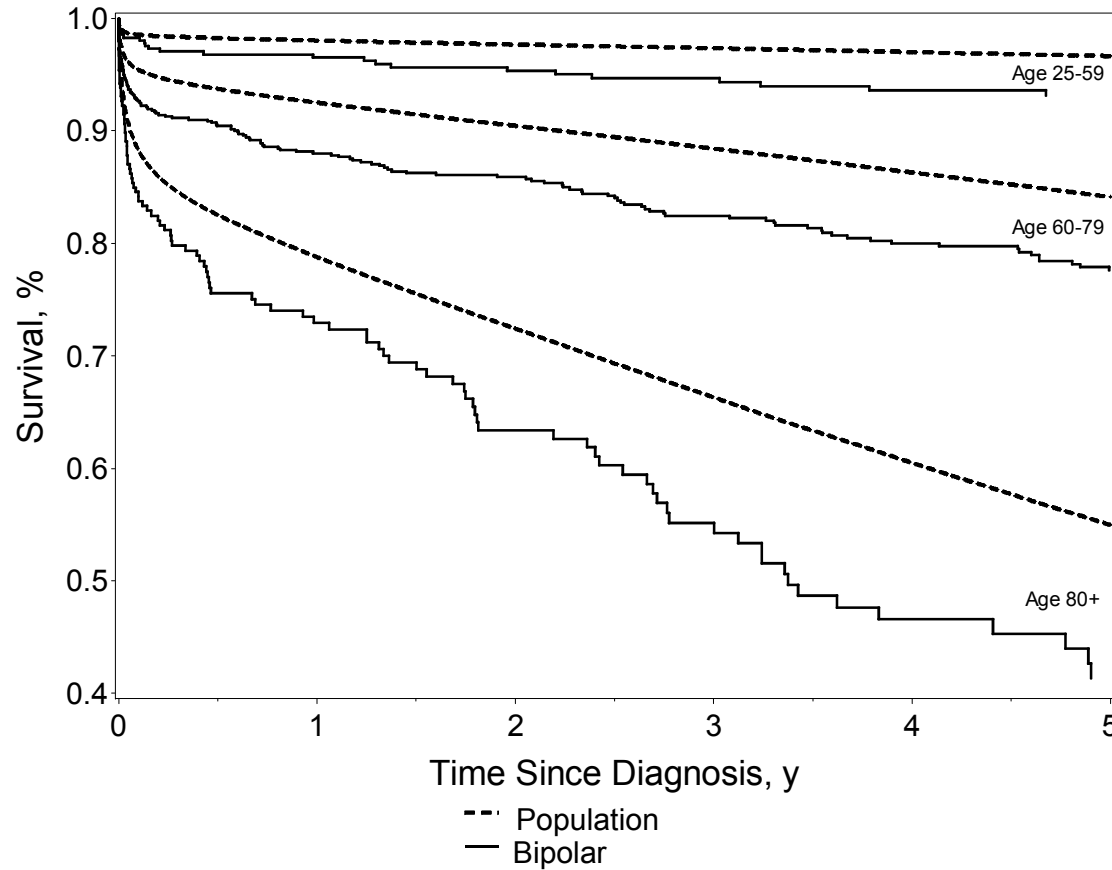

only

1  
2  
3  
4  
5  
6  
7  
8  
9  
10  
11  
12  
13  
14  
15  
16  
17  
18  
19  
20  
21  
22  
23  
24  
25  
26  
27  
28  
29  
30  
31  
32  
33  
34  
35  
36  
37  
38  
39  
40  
41  
42  
43  
44  
45  
46  
47  
48  
49

## FUNDING

Funded by Swedish Council for Working Life and Social Research and and clinical research funding from Stockholm County Council (PPG)

## COMPETING INTERESTS

All authors have completed the ICMJE uniform disclosure form (available on request from the corresponding author). JW, KW, LA, DE, UÖ has declared no support from any organization for the submitted work, no financial relationship with any organizations that would have interest in the submitted work in the previous three years, and no other activities that could appear to have influenced the submitted work. UÖ has declared traveling expenses from Janssen-Cilag for attending a course in October 2012 unrelated to the study.

## CONTRIBUTORSHIP

UÖ had the idea of the study and is guarantor of the study together with JH, who has performed the statistical analyses. JW has contributed to the design of the study and drafted the manuscript together with UÖ. KW, DE and LA have contributed to the design of the study and with revisions of the manuscript. All authors have approved the final version of the study.

## DATA SHARING

The analysis data set for this study is available from the National Board of Health and Welfare (Socialstyrelsen) in Sweden. Please contact JH for further information.

## References

1. World Health Organisation. Global atlas on cardiovascular disease prevention and control. Policies, strategies and interventions., 2011.
2. Socialstyrelsen. Folkhälsorapport 2009 (The National Public Health Report 2009) Stockholm: The National Board of Health and Welfare in Sweden, 2009.
3. Laursen TM. Life expectancy among persons with schizophrenia or bipolar affective disorder. *Schizophr Res*;131(1-3):101-4.

4. Laursen TM, Nordentoft M. Heart disease treatment and mortality in schizophrenia and bipolar disorder - changes in the Danish population between 1994 and 2006. *J Psychiatr Res*;45(1):29-35.
5. Osby U, Brandt L, Correia N, et al. Excess mortality in bipolar and unipolar disorder in Sweden. *Arch Gen Psychiatry* 2001;58(9):844-50.
6. Laursen TM, Munk-Olsen T, Nordentoft M, et al. Increased mortality among patients admitted with major psychiatric disorders: a register-based study comparing mortality in unipolar depressive disorder, bipolar affective disorder, schizoaffective disorder, and schizophrenia. *J Clin Psychiatry* 2007;68(6):899-907.
7. Ludvigsson JF, Andersson E, Ekbom A, et al. External review and validation of the Swedish national inpatient register. *BMC Public Health*;11:450.
8. Sellgren C, Landen M, Lichtenstein P, et al. Hultman CM, Langstrom N. Validity of bipolar disorder hospital discharge diagnoses: file review and multiple register linkage in Sweden. *Acta Psychiatr Scand*;124(6):447-53.
9. Osby U, Tiainen A, Backlund L, et al. Psychiatric admissions and hospitalization costs in bipolar disorder in Sweden. *J Affect Disord* 2009;115(3):315-22.
10. Whang W, Kubzansky LD, Kawachi I, et al. Depression and risk of sudden cardiac death and coronary heart disease in women: results from the Nurses' Health Study. *J Am Coll Cardiol* 2009;53(11):950-8.
11. McIntyre RS, Danilewitz M, Liauw SS, et al. Bipolar disorder and metabolic syndrome: an international perspective. *J Affect Disord*;126(3):366-87.
12. Zilber N, Schufman N, Lerner Y. Mortality among psychiatric patients--the groups at risk. *Acta Psychiatr Scand* 1989;79(3):248-56.
13. Lawrence DM, Holman CD, Jablensky AV, et al. Death rate from ischaemic heart disease in Western Australian psychiatric patients 1980-1998. *Br J Psychiatry* 2003;182:31-6.
14. Kisely S, Smith M, Lawrence D, et al. Mortality in individuals who have had psychiatric treatment: population-based study in Nova Scotia. *Br J Psychiatry* 2005;187:552-8.
15. Roshanaei-Moghaddam B, Katon W. Premature mortality from general medical illnesses among persons with bipolar disorder: a review. *Psychiatr Serv* 2009;60(2):147-56.
16. Sachs G, Bowden C, Calabrese JR, et al. Effects of lamotrigine and lithium on body weight during maintenance treatment of bipolar I disorder. *Bipolar Disord* 2006;8(2):175-81.
17. Newcomer JW. Medical risk in patients with bipolar disorder and schizophrenia. *J Clin Psychiatry* 2006;67(11):e16.
18. Lasser K, Boyd JW, Woolhandler S, et al. Smoking and mental illness: A population-based prevalence study. *JAMA* 2000;284(20):2606-10.
19. McElroy SL, Frye MA, Suppes T, et al. Correlates of overweight and obesity in 644 patients with bipolar disorder. *J Clin Psychiatry* 2002;63(3):207-13.
20. Kruger S, Shugar G, Cooke RG. Comorbidity of binge eating disorder and the partial binge eating syndrome with bipolar disorder. *Int J Eat Disord* 1996;19(1):45-52.
21. Druss BG, Zhao L, Von Esenwein S, et al. Understanding excess mortality in persons with mental illness: 17-year follow up of a nationally representative US survey. *Med Care*;49(6):599-604.
22. Ryan MC, Collins P, Thakore JH. Impaired fasting glucose tolerance in first-episode, drug-naive patients with schizophrenia. *Am J Psychiatry* 2003;160(2):284-9.
23. Lucae S, Salyakina D, Barden N, et al. P2RX7, a gene coding for a purinergic ligand-gated ion channel, is associated with major depressive disorder. *Hum Mol Genet* 2006;15(16):2438-45.

- 1
- 2
- 3
- 4
- 5 24. Gidlof O, Smith JG, Melander O, et al. A common missense variant in the ATP receptor P2X7 is associated with reduced risk of cardiovascular events. *PLoS One*;7(5):e37491.
- 6
- 7 25. Backlund L, Nikamo P, Hukic DS, et al. Cognitive manic symptoms associated with the P2RX7 gene in bipolar disorder. *Bipolar Disord*;13(5-6):500-8.
- 8 26. Fiedorowicz JG, Palagummi NM, Forman-Hoffman VL, et al. Miller DD, Haynes WG. Elevated prevalence of obesity, metabolic syndrome, and cardiovascular risk factors in bipolar disorder. *Ann Clin Psychiatry* 2008;20(3):131-7.
- 9
- 10 27. Birkenaes AB, Opjordsmoen S, Brunborg C, et al. The level of cardiovascular risk factors in bipolar disorder equals that of schizophrenia: a comparative study. *J Clin Psychiatry* 2007;68(6):917-23.
- 11
- 12 28. Fagiolini A, Frank E, Scott JA, et al. Metabolic syndrome in bipolar disorder: findings from the Bipolar Disorder Center for Pennsylvanians. *Bipolar Disord* 2005;7(5):424-30.
- 13
- 14 29. Johannessen L, Strudsholm U, Foldager L, et al. Increased risk of hypertension in patients with bipolar disorder and patients with anxiety compared to background population and patients with schizophrenia. *J Affect Disord* 2006;95(1-3):13-7.
- 15
- 16 30. Gothefors D, Adolfsson R, Attvall S, et al. Swedish clinical guidelines--prevention and management of metabolic risk in patients with severe psychiatric disorders. *Nord J Psychiatry*;64(5):294-302.
- 17
- 18 31. Laursen TM, Munk-Olsen T, Agerbo E, et al. Somatic hospital contacts, invasive cardiac procedures, and mortality from heart disease in patients with severe mental disorder. *Arch Gen Psychiatry* 2009;66(7):713-20.
- 19
- 20 32. Manderbacka K, Arffman M, Sund R, et al. How does a history of psychiatric hospital care influence access to coronary care: a cohort study. *BMJ Open*;2(2):e000831.
- 21
- 22 33. Adler M, Backlund L, Edman G, et al. Symptoms and treatment of bipolar patients in Sweden. *Int J Psychiatry Clin Pract*;16(3):170-7.
- 23
- 24
- 25
- 26
- 27
- 28
- 29
- 30
- 31
- 32
- 33
- 34
- 35
- 36
- 37
- 38
- 39
- 40
- 41
- 42
- 43
- 44
- 45
- 46
- 47
- 48
- 49

Our manuscript have been checked towards the STROBE Statement.

STROBE Statement—Checklist of items that should be included in reports of *cohort studies* -

|                              | Item No | Recommendation                                                                                                                                                                                                                                                                                                         |
|------------------------------|---------|------------------------------------------------------------------------------------------------------------------------------------------------------------------------------------------------------------------------------------------------------------------------------------------------------------------------|
| <b>Title and abstract</b>    | 1       | (a) Indicate the study's design with a commonly used term in the title or the abstract<br>(b) Provide in the abstract an informative and balanced summary of what was done and what was found                                                                                                                          |
| <b>Introduction</b>          |         |                                                                                                                                                                                                                                                                                                                        |
| Background/rationale         | 2       | Explain the scientific background and rationale for the investigation being reported                                                                                                                                                                                                                                   |
| Objectives                   | 3       | State specific objectives, including any prespecified hypotheses                                                                                                                                                                                                                                                       |
| <b>Methods</b>               |         |                                                                                                                                                                                                                                                                                                                        |
| Study design                 | 4       | Present key elements of study design early in the paper                                                                                                                                                                                                                                                                |
| Setting                      | 5       | Describe the setting, locations, and relevant dates, including periods of recruitment, exposure, follow-up, and data collection                                                                                                                                                                                        |
| Participants                 | 6       | (a) Give the eligibility criteria, and the sources and methods of selection of participants. Describe methods of follow-up<br>(b) For matched studies, give matching criteria and number of exposed and unexposed                                                                                                      |
| Variables                    | 7       | Clearly define all outcomes, exposures, predictors, potential confounders, and effect modifiers. Give diagnostic criteria, if applicable                                                                                                                                                                               |
| Data sources/<br>measurement | 8*      | For each variable of interest, give sources of data and details of methods of assessment (measurement). Describe comparability of assessment methods if there is more than one group                                                                                                                                   |
| Bias                         | 9       | Describe any efforts to address potential sources of bias                                                                                                                                                                                                                                                              |
| Study size                   | 10      | Explain how the study size was arrived at                                                                                                                                                                                                                                                                              |
| Quantitative variables       | 11      | Explain how quantitative variables were handled in the analyses. If applicable, describe which groupings were chosen and why                                                                                                                                                                                           |
| Statistical methods          | 12      | (a) Describe all statistical methods, including those used to control for confounding<br>(b) Describe any methods used to examine subgroups and interactions<br>(c) Explain how missing data were addressed<br>(d) If applicable, explain how loss to follow-up was addressed<br>(e) Describe any sensitivity analyses |
| <b>Results</b>               |         |                                                                                                                                                                                                                                                                                                                        |
| Participants                 | 13*     | (a) Report numbers of individuals at each stage of study—eg numbers potentially eligible, examined for eligibility, confirmed eligible, included in the study, completing follow-up, and analysed<br>(b) Give reasons for non-participation at each stage<br>(c) Consider use of a flow diagram                        |
| Descriptive data             | 14*     | (a) Give characteristics of study participants (eg demographic, clinical, social) and information on exposures and potential confounders<br>(b) Indicate number of participants with missing data for each variable of interest<br>(c) Summarise follow-up time (eg, average and total amount)                         |
| Outcome data                 | 15*     | Report numbers of outcome events or summary measures over time                                                                                                                                                                                                                                                         |
| Main results                 | 16      | (a) Give unadjusted estimates and, if applicable, confounder-adjusted estimates and their precision (eg, 95% confidence interval). Make clear which confounders were                                                                                                                                                   |

|                          |    |                                                                                                                                                                            |
|--------------------------|----|----------------------------------------------------------------------------------------------------------------------------------------------------------------------------|
|                          |    | adjusted for and why they were included                                                                                                                                    |
|                          |    | (b) Report category boundaries when continuous variables were categorized                                                                                                  |
|                          |    | (c) If relevant, consider translating estimates of relative risk into absolute risk for a meaningful time period                                                           |
| Other analyses           | 17 | Report other analyses done—eg analyses of subgroups and interactions, and sensitivity analyses                                                                             |
| <b>Discussion</b>        |    |                                                                                                                                                                            |
| Key results              | 18 | Summarise key results with reference to study objectives                                                                                                                   |
| Limitations              | 19 | Discuss limitations of the study, taking into account sources of potential bias or imprecision. Discuss both direction and magnitude of any potential bias                 |
| Interpretation           | 20 | Give a cautious overall interpretation of results considering objectives, limitations, multiplicity of analyses, results from similar studies, and other relevant evidence |
| Generalisability         | 21 | Discuss the generalisability (external validity) of the study results                                                                                                      |
| <b>Other information</b> |    |                                                                                                                                                                            |
| Funding                  | 22 | Give the source of funding and the role of the funders for the present study and, if applicable, for the original study on which the present article is based              |

\*Give information separately for exposed and unexposed groups.

**Note:** An Explanation and Elaboration article discusses each checklist item and gives methodological background and published examples of transparent reporting. The STROBE checklist is best used in conjunction with this article (freely available on the Web sites of PLoS Medicine at <http://www.plosmedicine.org/>, Annals of Internal Medicine at <http://www.annals.org/>, and Epidemiology at <http://www.epidem.com/>). Information on the STROBE Initiative is available at <http://www.strobe-statement.org>.





**Cardiovascular mortality in bipolar disorder: A population based cohort study in Sweden**

|                                 |                                                                                                                                                                                                                                                                                                                                                                                                                                                                           |
|---------------------------------|---------------------------------------------------------------------------------------------------------------------------------------------------------------------------------------------------------------------------------------------------------------------------------------------------------------------------------------------------------------------------------------------------------------------------------------------------------------------------|
| Journal:                        | <i>BMJ Open</i>                                                                                                                                                                                                                                                                                                                                                                                                                                                           |
| Manuscript ID:                  | bmjopen-2012-002373.R1                                                                                                                                                                                                                                                                                                                                                                                                                                                    |
| Article Type:                   | Research                                                                                                                                                                                                                                                                                                                                                                                                                                                                  |
| Date Submitted by the Author:   | 05-Feb-2013                                                                                                                                                                                                                                                                                                                                                                                                                                                               |
| Complete List of Authors:       | Westman, Jeanette; Karolinska Institutet, Centre for family medicine (CeFAM)<br>Hällgren, Jonas; Karolinska Institutet, Department of Medical epidemiology and biostatistics (MEB)<br>Wahlbeck, Kristian; THL National Institute for health and welfare, Erlinge, David; Lunds Universitet, Department of Cardiology<br>Alfredsson, Lars; Karolinska institutet, institute of environmental medicine<br>Ösby, Urban; Karolinska Institutet, Center for molecular medicine |
| <b>Primary Subject Heading</b>: | Mental health                                                                                                                                                                                                                                                                                                                                                                                                                                                             |
| Secondary Subject Heading:      | Mental health, Cardiovascular medicine, Public health, Epidemiology, Neurology                                                                                                                                                                                                                                                                                                                                                                                            |
| Keywords:                       | EPIDEMIOLOGY, PSYCHIATRY, CARDIOLOGY, Coronary heart disease < CARDIOLOGY, Myocardial infarction < CARDIOLOGY, Stroke < NEUROLOGY                                                                                                                                                                                                                                                                                                                                         |
|                                 |                                                                                                                                                                                                                                                                                                                                                                                                                                                                           |

SCHOLARONE™  
Manuscripts

Only

1  
2  
3 **Cardiovascular mortality in bipolar disorder: A population based**  
4 **cohort study in Sweden.**  
5  
6  
7

8  
9 Jeanette Westman *Postdoctoral researcher*<sup>1</sup>, Jonas Hällgren *Statistician*<sup>2</sup>, Kristian Wahlbeck  
10 *Professor of psychiatry*<sup>3</sup>, David Erlinge *Professor of cardiology*<sup>4</sup>, Lars Alfredsson *Professor*  
11 *of epidemiology*<sup>5</sup>, Urban Ösby *Senior researcher*<sup>1,6,7,8</sup>  
12  
13

14  
15  
16 <sup>1</sup>Centre for Family Medicine (CeFAM), Department of Neurobiology, Care Sciences, and  
17 Society, Karolinska Institutet, Stockholm, Sweden.

18  
19 <sup>2</sup>Department of Medical Epidemiology and Biostatistics (MEB), Karolinska Institutet,  
20 Stockholm, Sweden.  
21

22 <sup>3</sup>THL, National Institute for Health and Welfare, Helsinki, Finland.  
23

24 <sup>4</sup>Department of Cardiology, Lunds Universitet, Lund, Sweden  
25

26 <sup>5</sup>Institute of Environmental Medicine, Karolinska Institutet, Stockholm, Sweden.  
27

28 <sup>6</sup>Department of Molecular Medicine and Surgery, Neurogenetics, Karolinska Institutet,  
29 Stockholm, Sweden.  
30

31 <sup>7</sup>Center for Molecular Medicine, Karolinska Institutet, Stockholm, Sweden.  
32

33 <sup>8</sup>Department of Psychiatry, Tiohundra AB, Norrtälje, Sweden.  
34  
35

36 Correspondence: Jeanette Westman, PhD  
37 Alfred Nobels Allé 12, SE 141 83 Huddinge, Sweden  
38 Email: jeanette.westman@ki.se  
39 Telephone: +46-(0)8-524 800 00  
40 Fax: +4-(0)8-524 887 06  
41  
42

43 Word count of text: 2982  
44  
45  
46  
47  
48  
49  
50  
51  
52  
53  
54  
55  
56  
57  
58  
59  
60

## Article summary

### Article focus

- To estimate mortality in cardiovascular disease (CVD) and its subgroups cerebrovascular and coronary heart disease and acute myocardial infarction among 17,101 persons diagnosed with bipolar disorder in Sweden, compared to the general population in a national register study with a 20-year follow-up.

### Key messages

- Persons with bipolar disorder died of CVD approximately ten years early. Excess mortality of both CVD (n=824) and other somatic diseases (n=988) was higher than that of suicide and other external causes (n=675 deaths). Mortality rate ratios (MRR) for cerebrovascular disease, coronary heart disease, and acute myocardial infarction, were twice as high compared to the general population. Despite the increased mortality, hospital admissions, admission rate ratios (ARR) for CVD treatment in persons with bipolar disorder were only slightly increased.
- The increased cardiovascular mortality in persons with bipolar disorder calls for renewed efforts to prevent and treat somatic diseases. Specifically, our findings imply that it would be critical to ensure that persons with bipolar disorder receive the same quality care for CVD as the population.

### Strengths and limitations of this study

- A large national cohort with comprehensive data on patient characteristics was studied. Mortality data from the Swedish cause of death register are of high quality.
- Clinical information on symptoms and treatment were lacking.

1  
2  
3 **ABSTRACT** (word count: 265)

4 **Objective:** To estimate cardiovascular mortality among persons with bipolar disorder in  
5 Sweden compared to the general population.

6  
7 **Design:** Population register based cohort study with a 20-year follow-up.

8  
9 **Setting:** Sweden.

10  
11 **Participants:** The entire population of Sweden (n=10.6 million) of whom 17,101 persons  
12 were diagnosed with bipolar disorder between 1987 and 2006.

13  
14 **Main outcome measures:** Mortality rate ratios (MRR), excess mortality (excess deaths),  
15 cardiovascular disorders (CVD) and specifically cerebrovascular disease, coronary heart  
16 disease, acute myocardial infarction, sudden cardiac deaths, and hospital admission rate ratios  
17 (ARR).  
18  
19

20  
21 **Results:** Persons with bipolar disorder died of CVD approximately ten years earlier than the  
22 general population. One third (38%) of all deaths in persons with bipolar disorder were  
23 caused by CVD, and almost half (44%) by other somatic diseases, whereas suicide and other  
24 external causes accounted for less than a fifth of all deaths (18%). Excess mortality of both  
25 CVD (n=824) and other somatic diseases (n=988) was higher than that of suicide and other  
26 external causes (n=675 deaths). MRRs for cerebrovascular disease, coronary heart disease,  
27 and acute myocardial infarction, were twice as high in persons with bipolar disorder  
28 compared to the general population. Despite the increased mortality of CVD, hospital  
29 admissions (ARR) for CVD treatment were only slightly increased in persons with bipolar  
30 disorder when compared to the general population.  
31  
32

33  
34 **Conclusions:** The increased cardiovascular mortality in persons with bipolar disorder calls  
35 for renewed efforts to prevent and treat somatic diseases in this group. Specifically, our  
36 findings further imply that it would be critical to ensure that persons with bipolar disorder  
37 receive the same quality care for CVD as persons without bipolar disorder.  
38  
39  
40  
41  
42  
43  
44  
45  
46  
47  
48  
49  
50  
51  
52  
53  
54  
55  
56  
57  
58  
59  
60

## Introduction

Cardiovascular disease (CVD) is the main cause of death in many developed countries.<sup>1</sup> CVD encompasses a broad range of different conditions that are potentially life threatening. In Sweden, although mortality from CVD in the population has almost halved in the last two decades, CVD still accounts for more than 40% of all deaths in the country.<sup>2</sup> Premature death in patients with severe mental health disorders, especially patients with schizophrenia and bipolar disorder, has historically been attributed to suicide. However, more recent studies have shown that CVD leads to more reduced life spans than does suicide in those patients.<sup>3</sup> Persons with bipolar disorder have an increased risk of CVD and have been observed to die due to CVD twice as often as the general population.<sup>4-6</sup> Although previous studies have shown an association between bipolar disorder and mortality from CVD, few studies have addressed mortality rates in different types of vascular mortality, or examined their use of health care. An improved understanding of the causes behind and magnitude of CVD among bipolar patients is warranted along with an in-depth evaluation of different diagnostic CVD subgroups. The answers to these questions, which are far less investigated than among patients with schizophrenia, are essential in the efforts to address the problem of premature deaths due to CVD in bipolar patients, and they are the focus of the present Swedish national register-based study, which extends earlier Swedish findings<sup>5</sup> both by more specific CVD mortality analyses and more recent patient data.

The aim of this study was to evaluate excess mortality from CVD, such as cerebrovascular disease and coronary heart disease with acute myocardial infarction as its most important component, and also CVD hospital admissions, in persons with bipolar disorder in Sweden between 1987 and 2006 compared to the population.

## Methods

### Cohort and follow-up

All persons who resided in Sweden between the 1<sup>st</sup> of January 1987 and the 31<sup>st</sup> of December 2006 (n=10,631, 208) were identified using the Swedish Total Population Register (TPR). The TPR was established in 1968 and contains information on sex, date and place of birth, date of migration of every resident in Sweden. Information on hospital admission, medical diagnosis, and cause of death was obtained by linking the TRP with the national Swedish Cause-of-Death Register and the National Patient Register (NPR) using each resident's unique personal identification number.

The NPR, which is maintained by the National Board of Health and Welfare, contains information on all hospital in-patient treatments carried out in Sweden since 1987. For psychiatric in-patient care the register has nationwide coverage dating back from 1973. For each hospitalization, the unique national registration number, date of admission and discharge, and diagnosis are registered in NPR. In Sweden, all hospital diagnoses are classified according to the WHO International Classification of Diseases (ICD). Since the diagnostic definitions of affective disorders were substantially changed in ICD-9 and ICD-10 as compared with ICD-8, only patients diagnosed with bipolar disorder according to ICD-9 or ICD-10 were included in the study. Bipolar diagnoses recorded between 1987 and 1996 were identified using ICD-9 (296A, C, E, 298B). From 1997 and later, ICD-10 (F30-F31) was used to identify bipolar diagnoses. The Swedish Cause of Death Register (CDR) includes all individuals who were registered in Sweden at the time of death. The register provides information on date of death as well as main (underlying) and secondary causes of death based on death certificates. Definitions regarding causes of death and ICD codes used in this study are shown in Figure 1.

A total of 20,248 patients admitted to hospital between 1<sup>st</sup> of January 1987 and 31<sup>st</sup> of December 2006 with a main diagnosis of bipolar disorder (ICD-9; ICD-10) were identified in the NPR. Of the 20,248 patients, 3,147 had been previously diagnosed with schizophrenia (ICD-8: 295; ICD-9: 295; ICD-10; F20, F25) and were consequently excluded. Thus, the total risk population of the study comprised 17,101 patients with bipolar disorder. The follow-up period was 20 years (1987-2006). Immigrants were included from the date of immigration to Sweden. Each person was followed until December 31, 2006, or date of death or emigration,

1  
2  
3 depending on which came first. Inclusion in the risk population started from the date of first  
4 hospital admission (discharge diagnosis) during the study period.  
5  
6

### 7 8 **Statistical analysis**

9  
10 Person years at risk, number of cause-specific deaths and hospital admissions due to CVD for  
11 both bipolar patients and the general population were determined. Person time was stratified  
12 by sex, calendar year and age. Mortality rate ratios (MRR) and Admission rate ratios (ARR)  
13 and predicted mortality rates were calculated with corresponding 95% confidence intervals  
14 (CI) using Poisson regression models with the GENMOD procedure using statistical software  
15 SAS (version 9.2). All models were adjusted for or stratified by sex, attained age and year of  
16 follow-up.  
17  
18  
19  
20  
21

22  
23 To calculate the excess mortality for patients with bipolar disorder the observed number of  
24 deaths was compared with the expected number of deaths among patients with bipolar  
25 disorder. The expected number of deaths was calculated by applying age, sex and calendar  
26 specific mortality rates in the general population to the time at risk among the patients.  
27  
28 The risk of dying from CVD after first hospital admission was analyzed by estimating cause-  
29 specific survival curves using the Kaplan-Meier method. Additional adjusted hazard ratios  
30 with 95% CIs were estimated using Cox proportional hazard models.  
31  
32  
33  
34  
35

36  
37 When hospital admission due to CVD (Admission Rate Ratios, ARR) was the event of  
38 interest, follow-up ended on the day of first admission. To ensure that the observed cases  
39 were incident, a three-year run-in period was created to compensate for the lack of CVD  
40 coverage in the NPR before 1987. Hence, all bipolar patients analyzed had no hospital  
41 admissions due to CVD recorded for at least three years before follow-up.  
42  
43  
44  
45

## 46 **Results**

### 47 **Causes of death**

48  
49 Total mortality (death from any cause) between 1987 and 2006 in Sweden was more than  
50 twice as high among patients with bipolar disorder compared to the general population (MRR  
51 2.40; 95% CI 2.33-2.47). Specifically, 2,489 excess deaths in patients with bipolar disorder  
52 were observed (Table 1). With mortality causes subdivided into CVD, other somatic, and  
53 external causes of death, we found that men and women with bipolar disorder were twice as  
54  
55  
56  
57  
58  
59  
60

1  
2  
3 likely to die of CVD compared to the general population (MRR 2.03; 95% CI 1.93-2.13), with  
4 824 excess deaths due to CVD. Mortality from other somatic causes was also doubled (MRR  
5 2.10; 95% CI 2.00-2.19), with 988 excess deaths. External causes of death, such as suicide,  
6 homicides, and accidents, were increased more than nine times in bipolar patients (MRR 9.66;  
7 95% CI 8.99-10.37), with 675 excess deaths. As far as CVD subgroups were concerned,  
8 mortality from coronary heart disease and cerebrovascular disease was twice as high in  
9 bipolar patients, with 377 excess deaths (MRR 1.95; 95% CI 1.81-2.09) and 184 excess  
10 deaths (MRR 2.00; 95% CI 1.81-2.09), respectively. Mortality from acute myocardial  
11 infarction was almost twice as high in bipolar patients (MRR 1.83; 95% CI 1.67-2.01), with  
12 200 excess deaths. Mortality from sudden cardiac death, cardiac arrest/ventricular fibrillation,  
13 was also increased (MRR 1.85; 95% CI 1.42-2.41), with 25 excess deaths. Bipolar women  
14 and men of all ages had an equally increased mortality from CVD (data not shown).

### 23 24 **Age and cause of death**

25 MRR by age at death for all causes of death is shown in Fig 2a and subdivided into  
26 cardiovascular death (Fig 2b), other somatic death (Fig 2c), suicide and other external causes  
27 of death (Fig 2c). Cerebrovascular death (Fig 2e), death by coronary heart disease (Fig 2f),  
28 and death from acute myocardial infarction (Fig 2g) are reported separately.

29  
30  
31  
32  
33  
34 MRR for CVD was increased for bipolar patients across all ages but was particularly  
35 pronounced in the young age groups (Figure 2b). Patients with bipolar disorder who died of  
36 CVD were younger than people in the general population. The same finding was observed  
37 when we subdivided CVD into cerebrovascular disease, coronary heart disease and acute  
38 myocardial infarction (Figure 2e-g). For acute myocardial infarction and coronary heart  
39 disease the increased risk was most apparent in the 55-65 years age groups (2f-g). In the ages  
40 below 50 years the results should be interpreted with caution because there were very few  
41 events in these ages. Death by suicide and other external causes of death were 15 times more  
42 common among bipolar patients below 30 years of age compared to persons of the same age  
43 in the general population (Figure 2d). Overall, the MRR for suicide and other external causes  
44 of death decreased with increasing age. However, it should be noted that it remained  
45 significantly increased in persons aged between 70-74 years (MRR 6.88; CI 95% 5.06-9.35)  
46 (Figure 2d).  
47  
48  
49  
50  
51  
52  
53  
54  
55  
56  
57  
58  
59  
60



1  
2  
3 Age differences at death between persons with bipolar disorder and the population from  
4 coronary heart disease, acute myocardial infarction and cerebrovascular disease is shown in  
5 Figure 3a-3c. The earlier age at death for persons with bipolar disorder is clearly shown for all  
6 these causes of death.  
7  
8

### 9 10 **Admission rates**

11 Hospital admission rates for CVD among patients with bipolar disorder were similar to those  
12 for the general population even though MRR for CVD was almost twice as high, independent  
13 of the specific CVD cause (Tables 1 and 2). Survival rates five years after first hospital  
14 admission for CVD were significantly lower among bipolar patients than among the general  
15 population (Figure 4).  
16  
17  
18  
19  
20

## 21 **Discussion**

### 22 **Key findings**

23  
24 In this nationwide study of mortality among persons with bipolar disorder in Sweden  
25 compared to the population, somatic illness was the main cause of death. Bipolar patients died  
26 of CVD around ten years earlier than the general population. Mortality from cerebrovascular  
27 disease, coronary heart disease, and acute myocardial infarction was twice as high in bipolar  
28 patients as in the general population, while the frequency of hospital admissions due to these  
29 diseases was not increased. Our findings showed that CVD in persons with bipolar disorder  
30 accounted for 824 excess deaths and other somatic diseases 988 excess deaths, taken together  
31 1,812 excess deaths, both larger than suicide and other external causes of death (n=675).  
32 Interestingly, sudden cardiac death was also increased.  
33  
34  
35  
36  
37  
38  
39  
40  
41

### 42 **Strengths and limitations**

43 The Swedish National Patient Register and Cause of Death Register include everyone who  
44 resides in the country and are considered unique, comprehensive and highly credible.  
45 Currently more than 99% of all somatic and psychiatric hospital discharges are recorded in  
46 the National Patient Register.<sup>7</sup> Swedish hospitals and government agencies are obliged by law  
47 to enter medical information in the National Patient Register. All diagnoses in the National  
48 Patient and Cause of Death registers were given by patients' doctors using international  
49 classification standards (ICD codes). Being register based, this study used information about  
50 clinical diagnoses from hospital admissions in Sweden. During the study period, the ICD  
51 diagnostic definitions were specific for bipolar disorder. A validation of the Swedish clinical  
52  
53  
54  
55  
56  
57  
58  
59  
60

1  
2  
3 bipolar diagnoses has shown high validity, sufficient for epidemiological studies.<sup>8</sup> One  
4 limitation of this study was that it was based on in-patient diagnoses, which may have  
5 generated a selective bias towards severely ill patients. However, most individuals at severe  
6 stages of bipolar disorder are admitted to hospital in Sweden. Since medical care is free in  
7 Sweden, there is no bias by costs for hospital care leading to differences in health-seeking  
8 behavior. In a previous study, we have shown that the number and frequency of hospital  
9 admissions due to bipolar disorder remained relatively unchanged in Sweden during recent  
10 years, while the overall number of psychiatric admissions was drastically reduced.<sup>9</sup> We did  
11 not have access to medical records or information on medical treatment. In terms of the  
12 validity of the data on causes of death, in CVD deaths we found a slightly higher autopsy rate  
13 (28%) among patients with bipolar disorder than in the general population (22%). It is  
14 unlikely that these small differences affected the outcome of the study. Although MRR for  
15 CVD deaths were generally lower for women than for men but not significantly, the absolute  
16 numbers of deaths was larger among women. Thus, the lower MRR for women with bipolar  
17 disorder relates to differences in CVD mortality between women and men in the general  
18 population.  
19  
20  
21  
22  
23  
24  
25  
26  
27  
28  
29  
30

### 31 **Findings from other studies**

32 The findings of this study add to the growing body of evidence that somatic diseases,  
33 particularly CVD, contribute to a shorter lifespan among bipolar patients. Findings from  
34 several large register-based studies from different parts of the world indicate that  
35 cardiovascular disease is responsible for the majority of excess deaths, with up to 2.5-fold  
36 increased mortality.<sup>3 5 6 10-14</sup> Studies using registers from the Nordic countries have shown that  
37 bipolar patients run almost twice the risk of dying from CVD than do persons in the general  
38 population, the mechanisms for which are currently unknown.<sup>4 5</sup> There is also a growing body  
39 of evidence from studies in other countries, and similar findings have been observed in a  
40 representative study of the US population.<sup>15</sup> Studies have shown a higher cardiovascular  
41 mortality in persons with bipolar disorder type I compared to bipolar disorder type II or major  
42 depressive disorder.<sup>16 17</sup> In our Swedish data, bipolar disorder type I, can not be separated  
43 from bipolar disorder type II. However, patients with bipolar disorder type I are much more  
44 likely to be hospitalized and thus to be included in our sample. Earlier age of CVD has been  
45 shown in several studies,<sup>15</sup> and is also confirmed in our findings of increased cardiovascular  
46 death at a younger age compared to the population in Sweden. Possible risk factors for the  
47 increased mortality from CVD among bipolar patients may include adverse effects of  
48  
49  
50  
51  
52  
53  
54  
55  
56  
57  
58  
59  
60

1 medication,<sup>18 19</sup> high levels of smoking,<sup>20</sup> unhealthy diet,<sup>21 22</sup> lack of physical activity,<sup>21</sup> low  
2 social-economic status,<sup>23</sup> and lower rates of nutritional counseling.<sup>24</sup> Studies have shown that  
3 bipolar disorder patients deviate from age-based norms on arterial stiffness measures.<sup>25</sup> In  
4  
5  
6  
7  
8  
9  
10  
11  
12  
13  
14  
15  
16  
17  
18  
19  
20  
21  
22  
23  
24  
25  
26  
27  
28  
29  
30  
31  
32  
33  
34  
35  
36  
37  
38  
39  
40  
41  
42  
43  
44  
45  
46  
47  
48  
49  
50  
51  
52  
53  
54  
55  
56  
57  
58  
59  
60  
addition, effects of genetic associations, such as those reported between Type 2 diabetes,  
CHD and schizophrenia,<sup>26</sup> could not be excluded. One of the most important locuses of  
genetic polymorphisms linked to bipolar disease and depression is around the ATP-activated  
ion-channel receptor *P2X7*.<sup>27</sup> Recently, a polymorphism in the *P2X7* gene was linked to  
increased risk of stroke and acute myocardial infarction,<sup>28</sup> and the same polymorphism has  
also recently been shown to be linked to cognitive symptoms in bipolar disorder,<sup>29</sup> indicating  
that common genetic factors could have effect on both cardiovascular disease and bipolar  
disorder. Also, inflammation has been pointed out as a potential biological cause of increased  
CVD in bipolar disorder<sup>30 31</sup> together with endothelial dysfunction.<sup>32</sup>

### **CVD undertreated in persons with bipolar disorder**

Studies of patients with bipolar disorder have shown that the patients run an increased risk of  
metabolic syndrome,<sup>33</sup> i.e. increased blood glucose,<sup>34</sup> and cholesterol levels,<sup>35</sup> higher blood  
pressure,<sup>36</sup> and higher prevalence of overweight and obesity<sup>21</sup>, closely associated with CVD.  
To prevent and treat metabolic disorders in patients with severe mental illnesses such as  
bipolar disorder, new guidelines have been drawn up for clinicians in Sweden.<sup>37</sup> However, the  
substantially younger age at CVD disease among persons with bipolar disorder compared to  
the population need to be further emphasized. The effects of those guidelines are still to be  
evaluated.

Our finding that patients with bipolar disorder showed only slightly increased hospital  
admissions rates for CVD despite their twice as high cardiovascular mortality, strongly  
suggests that CVD is undertreated in bipolar patients when compared to the general  
population. In a Danish study, the rates of invasive heart disease procedures were 40% lower  
among persons with bipolar disorder than in the general population.<sup>4</sup> Although the younger  
age at cardiac events in bipolar disorder compared to the population may reduce detection,  
this possible contributing factor is unlikely to cause the reduced rates of invasive heart  
procedures. Sudden cardiac mortality from cardiac arrest/ventricular fibrillation was increased  
among patients with bipolar disorder (MRR: 1.85), but the 25 excess cases does not explain  
the difference in hospital admissions in terms of increased sudden death before  
hospitalization. Thus, the reasons for CVD undertreatment in bipolar disorder is not explained

1  
2  
3 by the current findings. In our study, the MRR and ARR patient populations are slightly  
4 different, in the respect that the ARR patients are identified at their first index admission,  
5 while the MRR patients may have several admissions, and thus being more severely affected.  
6 Unequal access to health care (i.e. receiving cardiac treatment of lower quality) for reasons  
7 other than financial has been previously suggested as a contributor to excess CVD mortality  
8 in patients with severe mental disorders, such as schizophrenia,<sup>38</sup> and may be indicated by our  
9 findings of increased mortality after discharge from hospital compared to the population.  
10 These factors have not been studied extensively in bipolar patients. Health care in Sweden is  
11 free and is financed primarily through taxes. Therefore, it is unlikely that patients with bipolar  
12 disorder do not seek hospital care for lack of financial means.  
13  
14  
15  
16  
17  
18  
19  
20

21 Many mechanisms can contribute to the under-treatment of CVD among people with bipolar  
22 disorder. Our results indicate a failure of the health care system to identify and address the  
23 health needs of those patients, which has also been shown in other studies of people with  
24 severe mental disorders.<sup>39</sup> The levels of CVD mortality in our bipolar persons are similar to  
25 those in schizophrenia, where adverse effects of antipsychotic medication have been  
26 considered the main contributing factor. When compared with schizophrenia, a recent study  
27 of bipolar disorder in Stockholm County found only 29% of bipolar patients medicating with  
28 antipsychotics, as compared to practically all schizophrenia patients, which raises the question  
29 of the importance of adverse effects of antipsychotics in CVD.<sup>40</sup>  
30  
31  
32  
33  
34  
35  
36  
37

### 38 **Conclusions**

39 The observed number of deaths from cardiovascular diseases in patients with bipolar  
40 disorders was almost twice as the expected number when comparing with the general  
41 population, suggesting that more resources are needed for the prevention of these diseases in  
42 this patient group. Targeted interventions by effective cooperation between primary health  
43 care and psychiatric professionals would be crucial in the efforts to reduce excess CVD  
44 mortality in patients with bipolar disorder. Finally, effective cardiac treatment would ensure  
45 longevity and improved quality of life for patients with bipolar disorder.  
46  
47  
48  
49  
50  
51  
52  
53  
54  
55  
56  
57  
58  
59  
60

1  
2  
3  
4  
5  
6  
7  
8  
9  
10  
11  
12  
13  
14  
15  
16  
17  
18  
19  
20  
21  
22  
23  
24  
25  
26  
27  
28  
29  
30  
31  
32  
33  
34  
35  
36  
37  
38  
39  
40  
41  
42  
43  
44  
45  
46  
47  
48  
49  
50  
51  
52  
53  
54  
55  
56  
57  
58  
59  
60

For peer review only

1  
2  
3 **Contributors:** UÖ had the idea of the study and is guarantor of the study together with JH,  
4 who has performed the statistical analyses. JW has contributed to the design of the study and  
5 drafted the manuscript together with UÖ. KW, DE and LA have contributed to the design of  
6 the study and with revisions of the manuscript. All authors have approved the final version of  
7 the study.  
8  
9  
10

11 **Funding:** This paper was supported by Swedish Council for Working Life and Social  
12 Research (grant number FAS 2008-0885) and Stockholm County Council (Grant number PPG  
13 -20120263). The study was conducted and analyzed independently from its funders.  
14

15 **Competing interests:** All authors have completed the ICMJE uniform disclosure form  
16 (available on request from the corresponding author). JW, KW, LA, DE, UÖ has declared no  
17 support from any organization for the submitted work, no financial relationship with any  
18 organizations that would have interest in the submitted work in the previous three years, and  
19 no other activities that could appear to have influenced the submitted work. UÖ has declared  
20 traveling expenses from Janssen-Cilag for attending a course in October 2012 unrelated to the  
21 study.  
22  
23  
24  
25  
26  
27

28 **Ethical approval:** This study was approved by the ethical review board in Stockholm  
29 County. The ethical review board determined that informed consent from participating  
30 individuals was not required.  
31

32 **Data sharing:** The analysis data set for this study is available from the National Board of  
33 Health and Welfare (Socialstyrelsen) in Sweden. Please contact JH for further information.  
34

35 **Licence for publication:** The Corresponding Author has the right to grant on behalf of all  
36 authors and does grant on behalf of all authors, an exclusive licence on a worldwide basis to  
37 the BMJ Publishing Group Ltd and its Licensees to permit this article (if accepted) to be  
38 published in BMJ editions and any other BMJ PGL products and sublicences to exploit all  
39 subsidiary rights, as set out in our licence ( [http://resources.bmj.com/bmj/authors/checklists-](http://resources.bmj.com/bmj/authors/checklists-forms/licence-for-publication)  
40 [forms/licence-for-publication](http://resources.bmj.com/bmj/authors/checklists-forms/licence-for-publication)).  
41  
42  
43  
44  
45  
46  
47  
48  
49  
50  
51  
52  
53  
54  
55  
56  
57  
58  
59  
60

Figure 1. ICD-coding and classification of disease and mortality.

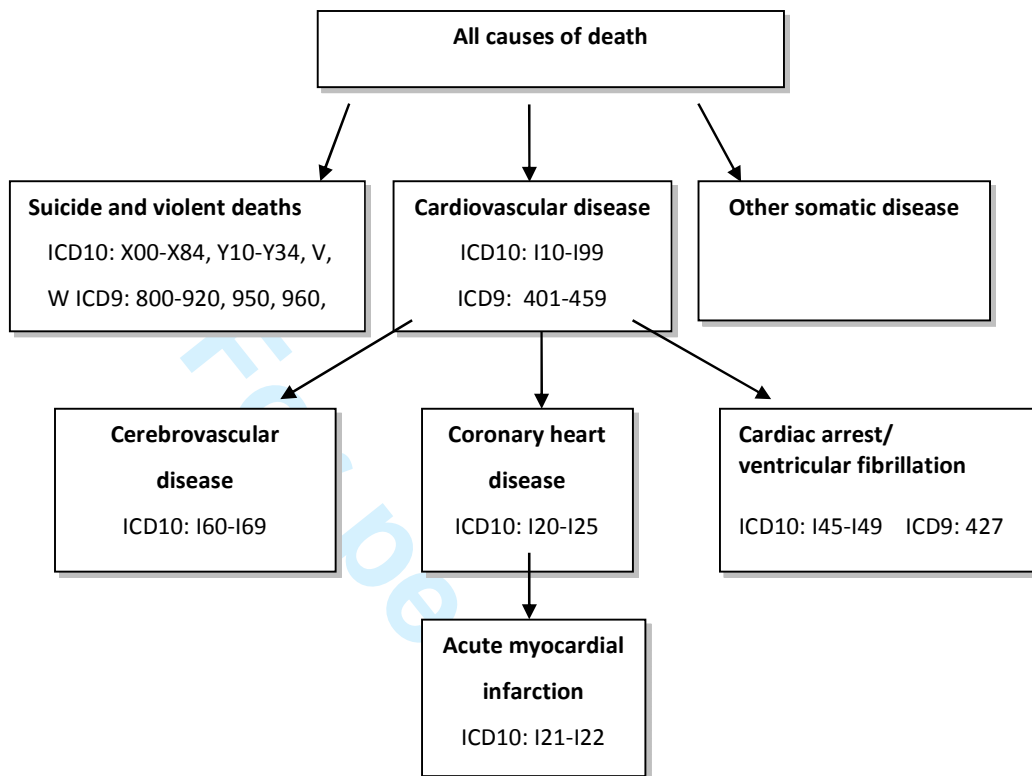

Table 1. Mortality rate ratios for bipolar patients between 1987 and 2006

| Cause of death                          | Men   |                   | Women |                    | Total (both sexes) |                   |                       |
|-----------------------------------------|-------|-------------------|-------|--------------------|--------------------|-------------------|-----------------------|
|                                         | Cases | MRR ( 95% CI)     | Cases | MRR ( 95% CI)      | Cases              | MRR ( 95% CI)     | Excess cases (95% CI) |
| All causes of death                     | 1874  | 2.48 (2.37-2.59)  | 2393  | 2.34 (2.25-2.44)   | 4267               | 2.40 (2.33-2.47)  | 2489 (2361-2617)      |
| Cardiovascular disease                  | 733   | 2.16 (2.01-2.33)  | 892   | 1.93 (1.81-2.06)   | 1625               | 2.03 (1.93-2.13)  | 824 (745-903)         |
| Other somatic deaths                    | 735   | 1.97 (1.83-2.11)  | 1154  | 2.19 (2.06-2.32)   | 1889               | 2.10 (2.00-2.19)  | 988 (902-1073)        |
| Suicide and other External deaths       | 406   | 9.37 (8.50-10.33) | 347   | 10.02 (9.01-11.13) | 753                | 9.66 (8.99-10.37) | 675 (621-729)         |
| Cerebrovascular disease                 | 144   | 2.29 (1.94-2.70)  | 224   | 1.86 (1.63-2.12)   | 368                | 2.00 (1.81-2.22)  | 184 (147-222)         |
| Coronary heart disease                  | 385   | 2.00 (1.81-2.21)  | 391   | 1.89 (1.71-2.09)   | 776                | 1.95 (1.81-2.09)  | 377 (323-432)         |
| Acute myocardial infarction             | 227   | 1.89 (1.66-2.15)  | 213   | 1.78 (1.55-2.03)   | 440                | 1.83 (1.67-2.01)  | 200 (159-241)         |
| Cardiac arrest/Ventricular fibrillation | 23    | 2.29 (1.52-3.45)  | 32    | 1.62 (1.15-2.30)   | 55                 | 1.85 (1.42-2.41)  | 25 (12-42)            |



**Table 2. Admission rate ratios for bipolar patients during  
1990 to 2006**

| Hospital admissions                | Men   |                  | Women |                  | Total (both sexes) |                  |                       |
|------------------------------------|-------|------------------|-------|------------------|--------------------|------------------|-----------------------|
|                                    | Cases | ARR ( 95% CI)    | Cases | ARR ( 95% CI)    | Cases              | ARR ( 95% CI)    | Excess cases (95% CI) |
| <b>Cardiovascular disease</b>      | 540   | 1.27 (1.16-1.38) | 696   | 1.33 (1.24-1.43) | 1236               | 1.30 (1.23-1.38) | 287 (218-356)         |
| <b>Cerebrovascular disease</b>     | 179   | 1.32 (1.14-1.53) | 271   | 1.43 (1.27-1.62) | 450                | 1.39 (1.26-1.52) | 125 (84-167)          |
| <b>Coronary heart disease</b>      | 212   | 1.02 (0.89-1.17) | 207   | 1.06 (0.92-1.21) | 419                | 1.04 (0.94-1.14) | 15 (-25-55)           |
| <b>Acute myocardial infarction</b> | 133   | 0.96 (0.81-1.14) | 137   | 1.11 (0.94-1.31) | 270                | 1.03 (0.92-1.16) | 8 (-24-41)            |

Figure 2a. Mortality Rate Ratios (MRR) for all causes of death by age at death in bipolar disorder patients and the general population.

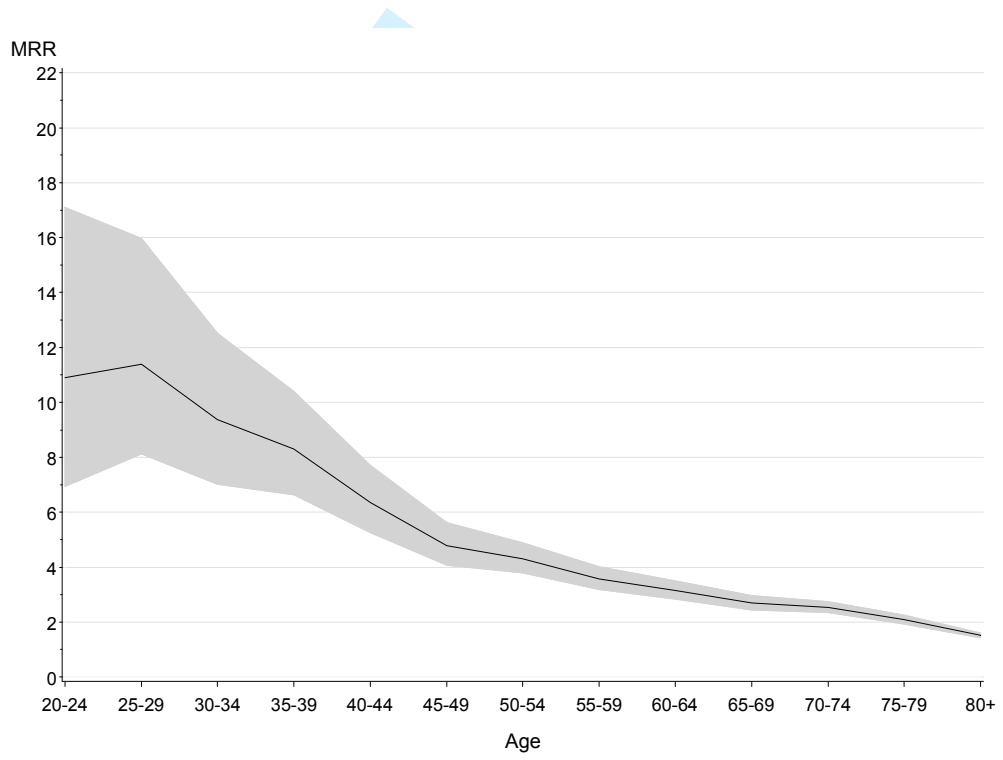

ew only

Figure 2b. Mortality Rate Ratios (MRR) for cardiovascular death by age at death in persons with bipolar disorder patients and the general population.

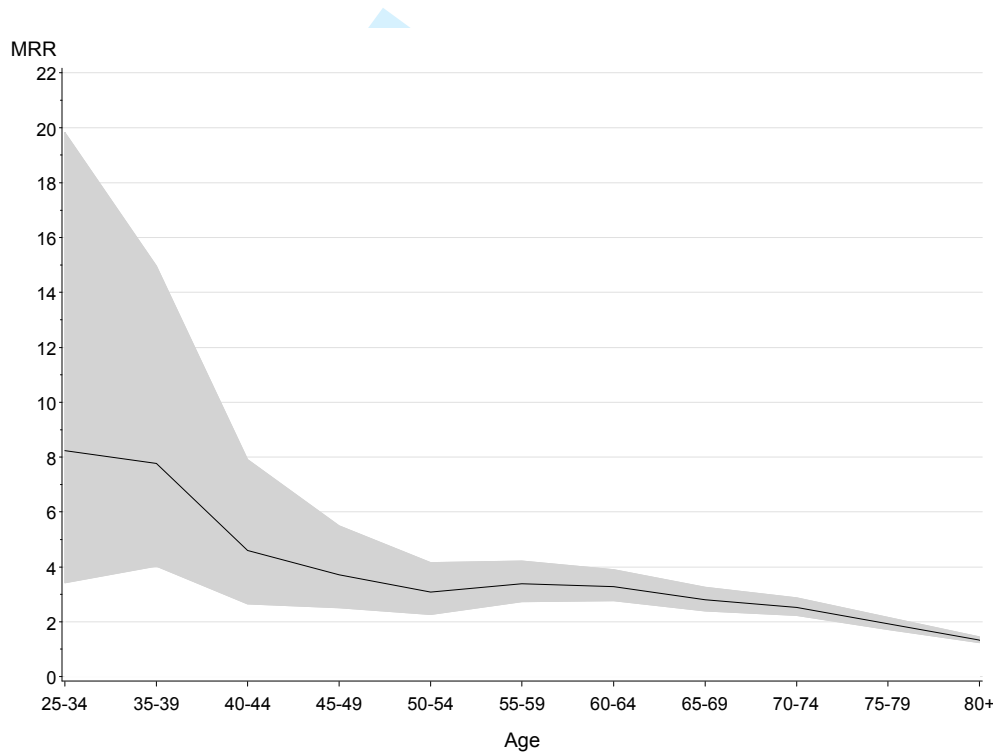

For peer review only

Figure 2c. Mortality Rate Ratios (MRR) for other somatic death by age at death in patients with bipolar disorder and the general population.

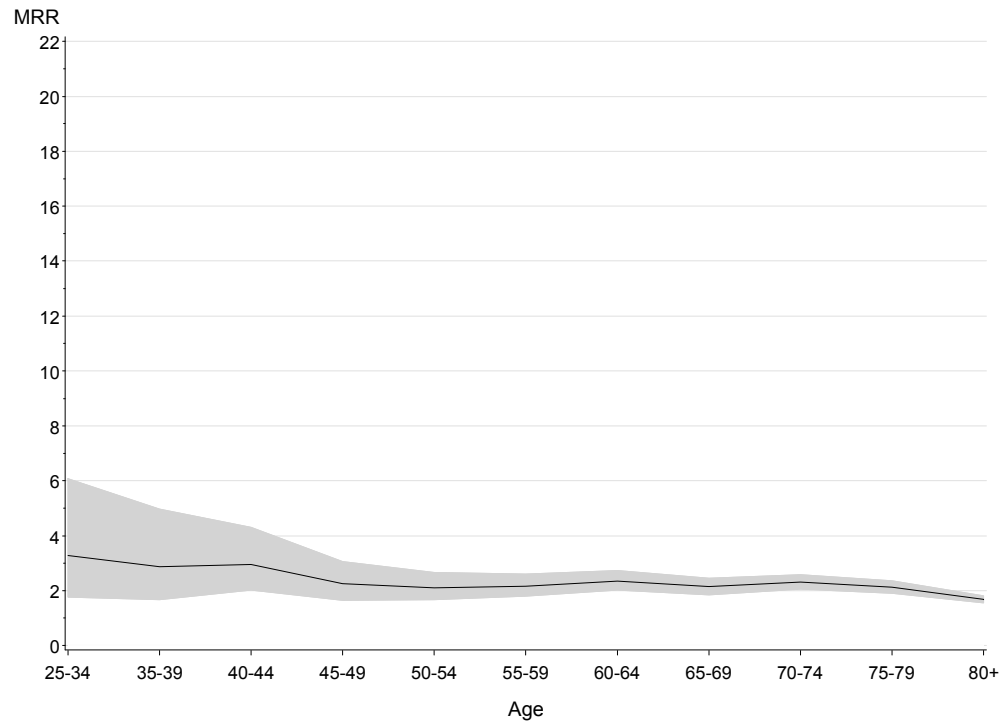

Figure 2d. Mortality Rate Ratios (MRR) of suicide and other external causes of death by age at death in patients with bipolar disorder and the general population.

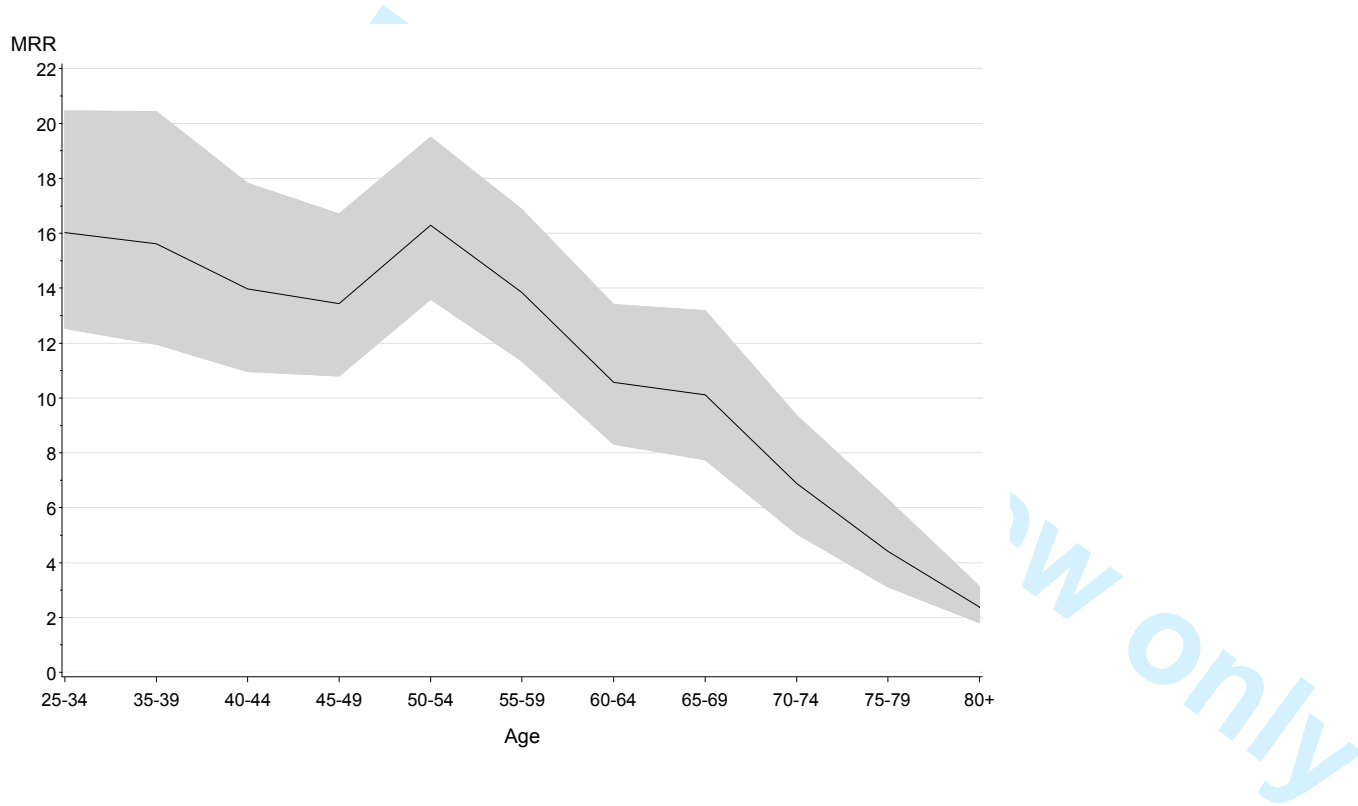

Figure 2e. Mortality Rate Ratios (MRR) of cerebrovascular disease by age at death in patients with bipolar disorder and the general population.

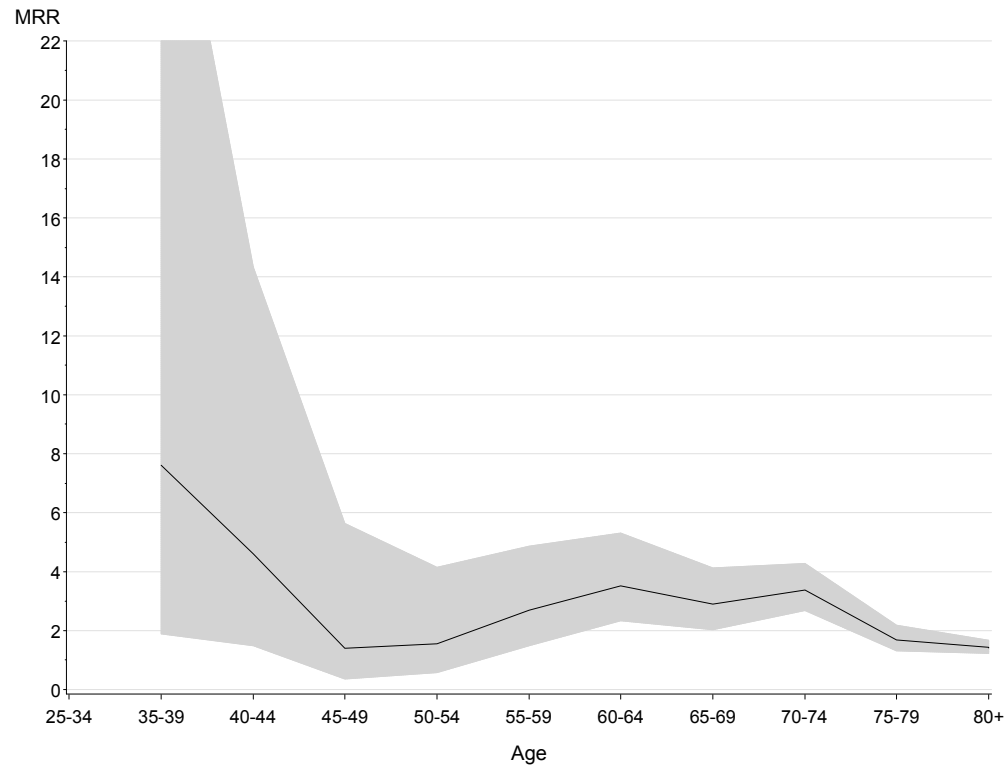

For peer review only

Figure 2f. Mortality Rate Ratios (MRR) of coronary heart disease by age at death in patients with bipolar disorder and the general population.

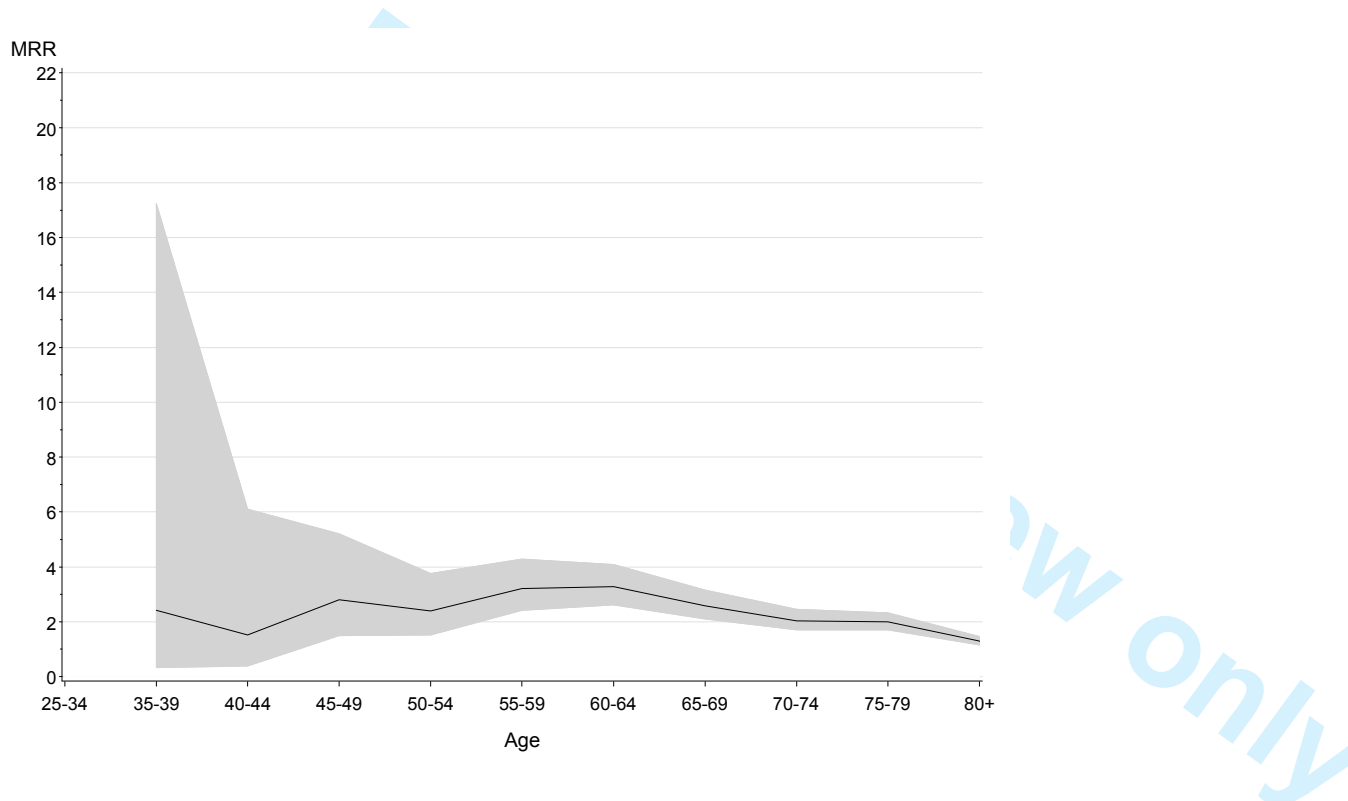

Figure 2g. Mortality Rate Ratios (MRR) of acute myocardial infarction by age at death in patients with bipolar disorder and the general population.

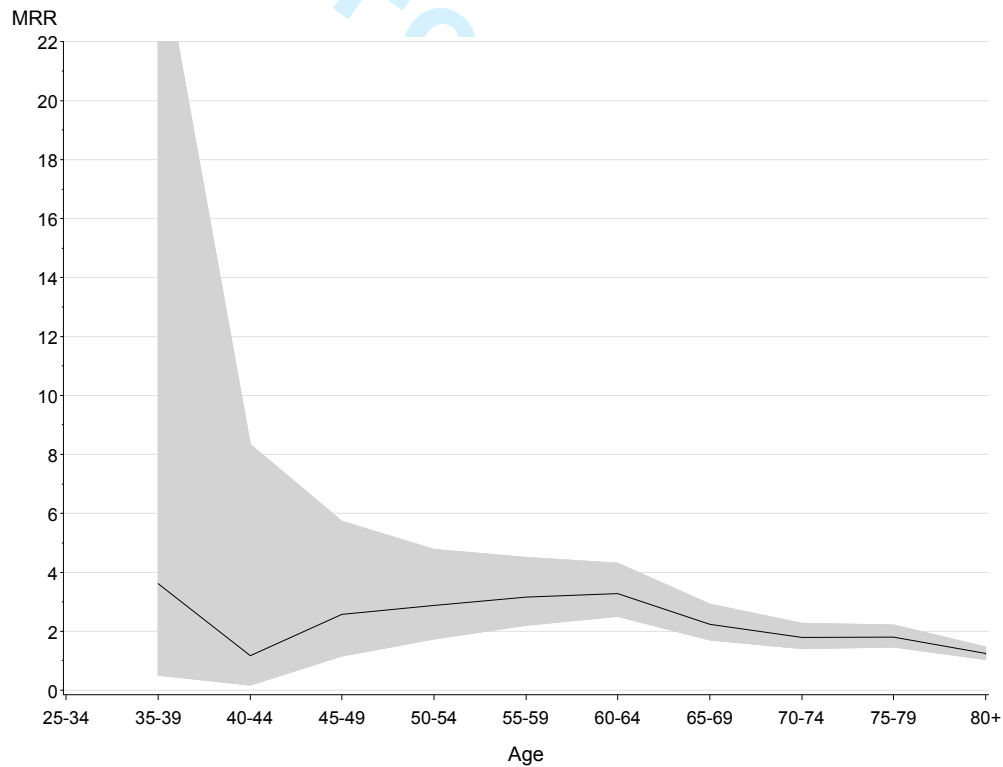



Figure 3a. Mortality of coronary heart disease per 1000 person-years in patients with bipolar disorder and the general population adjusting for sex and calendar year.

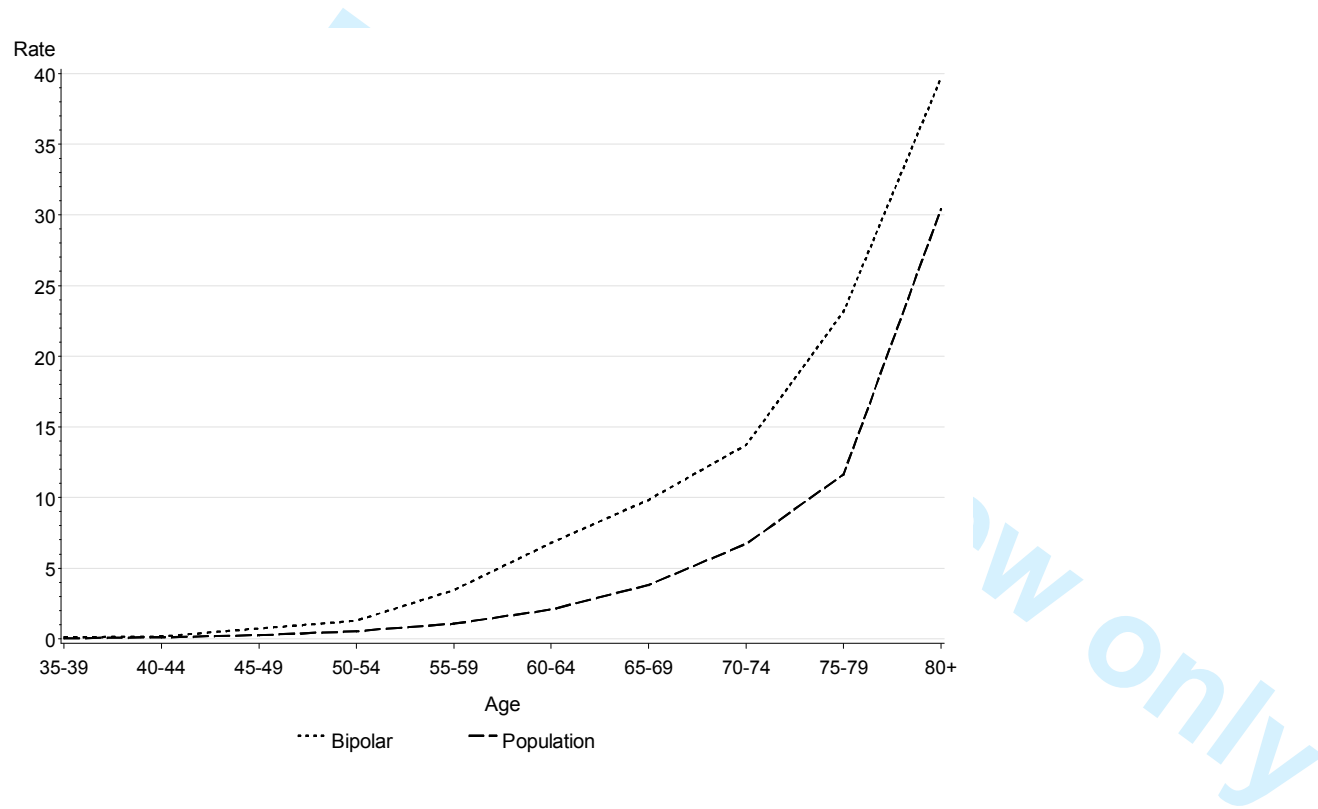

Figure 3b. Acute myocardial infarction

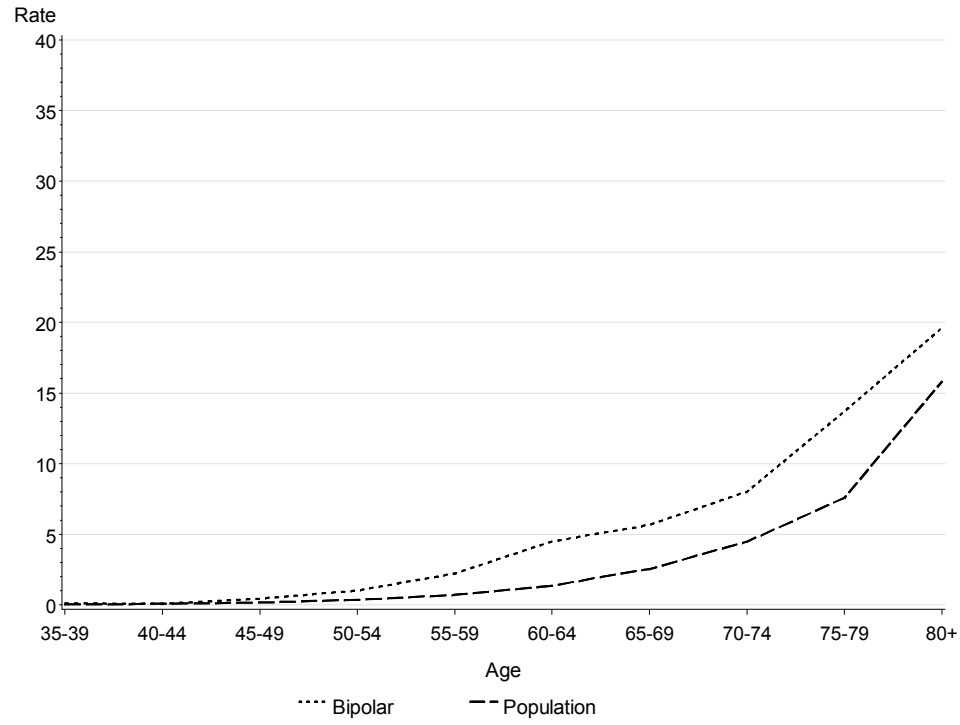

Preprint only

Figure 3c. Cerebrovascular disease

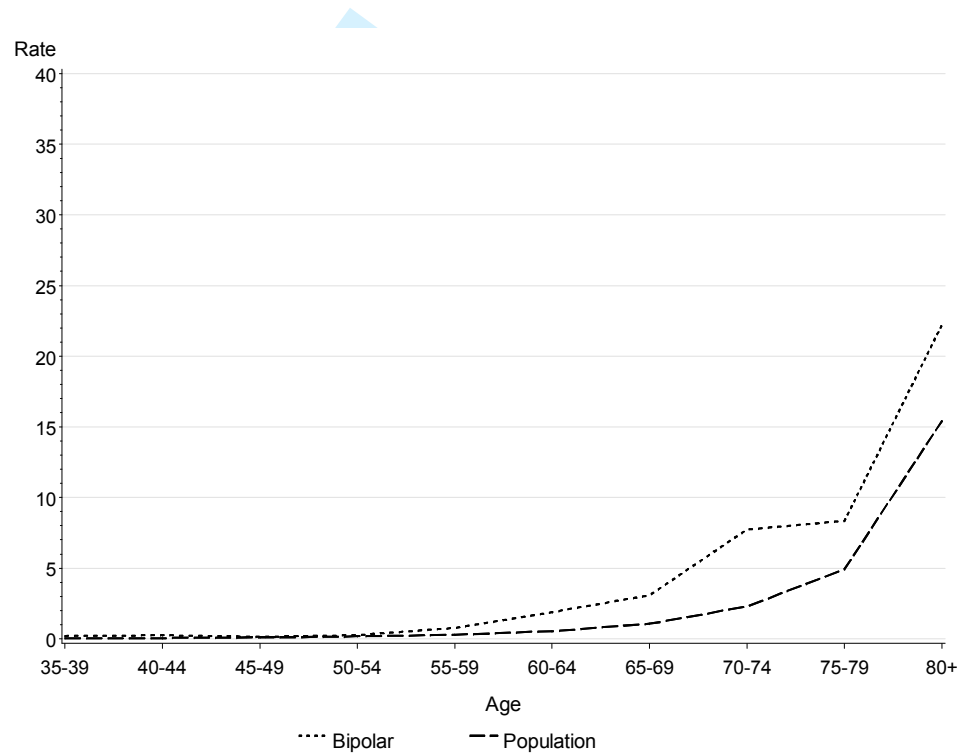

For peer review only

Figure 4. Five-year survival of cardiovascular disease after discharge from first cardiovascular admission stratified by age at hospital contact.

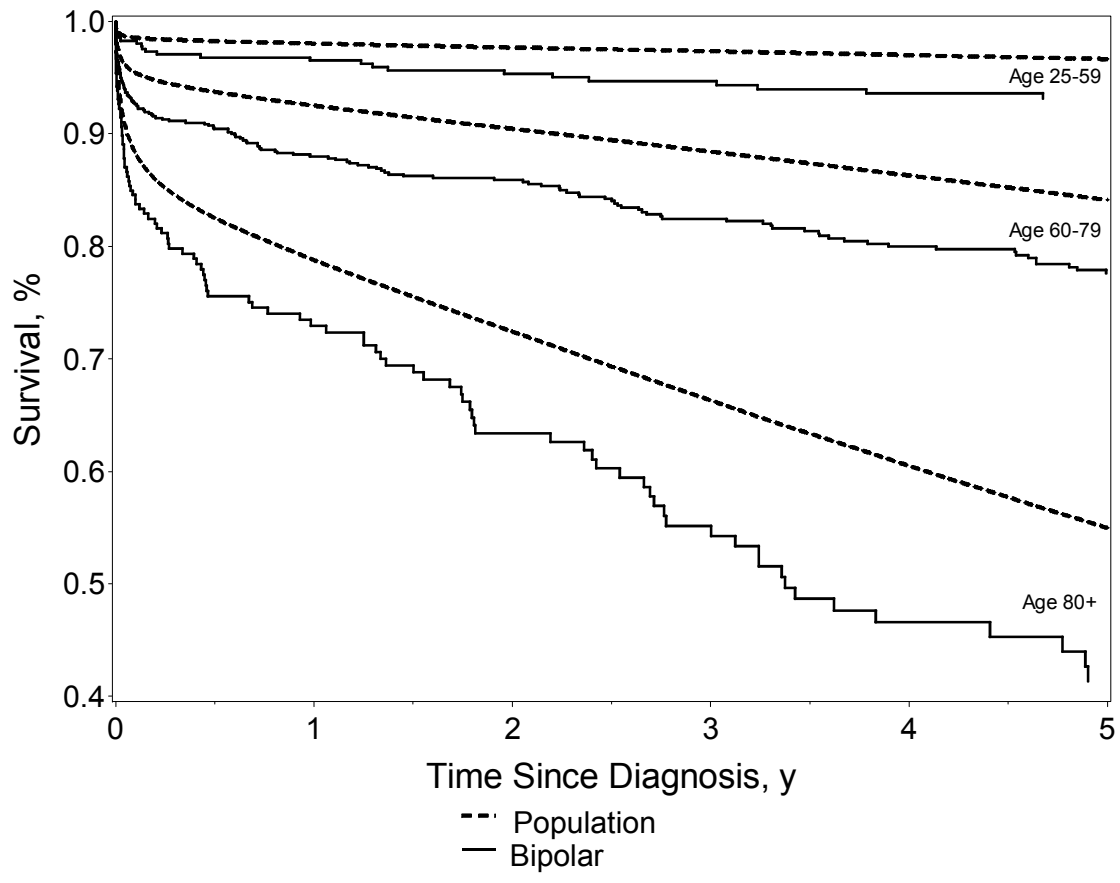

only

## References

1. World Health Organisation. Global atlas on cardiovascular disease prevention and control. Policies, strategies and interventions., 2011.
2. Socialstyrelsen. Folkhälsorapport 2009 (The National Public Health Report 2009) Stockholm: The National Board of Health and Welfare in Sweden, 2009.
3. Laursen TM. Life expectancy among persons with schizophrenia or bipolar affective disorder. *Schizophr Res*;131(1-3):101-4.
4. Laursen TM, Nordentoft M. Heart disease treatment and mortality in schizophrenia and bipolar disorder - changes in the Danish population between 1994 and 2006. *J Psychiatr Res*;45(1):29-35.
5. Osby U, Brandt L, Correia N, Ekblom A, Sørensen P. Excess mortality in bipolar and unipolar disorder in Sweden. *Arch Gen Psychiatry* 2001;58(9):844-50.
6. Laursen TM, Munk-Olsen T, Nordentoft M, Mortensen PB. Increased mortality among patients admitted with major psychiatric disorders: a register-based study comparing mortality in unipolar depressive disorder, bipolar affective disorder, schizoaffective disorder, and schizophrenia. *J Clin Psychiatry* 2007;68(6):899-907.
7. Ludvigsson JF, Andersson E, Ekblom A, Feychting M, Kim JL, Reuterwall C, et al. External review and validation of the Swedish national inpatient register. *BMC Public Health*;11:450.
8. Sellgren C, Landén M, Lichtenstein P, Hultman CM, Langström N. Validity of bipolar disorder hospital discharge diagnoses: file review and multiple register linkage in Sweden. *Acta Psychiatr Scand*;124(6):447-53.
9. Osby U, Tiainen A, Backlund L, Edman G, Adler M, Hallgren J, et al. Psychiatric admissions and hospitalization costs in bipolar disorder in Sweden. *J Affect Disord* 2009;115(3):315-22.
10. McIntyre RS, Danilewitz M, Liauw SS, Kemp DE, Nguyen HT, Kahn LS, et al. Bipolar disorder and metabolic syndrome: an international perspective. *J Affect Disord*;126(3):366-87.
11. Zilber N, Schufner N, Lerner Y. Mortality among psychiatric patients--the groups at risk. *Acta Psychiatr Scand* 1989;79(3):248-56.
12. Lawrence DM, Holman CD, Jablensky AV, Hobbs MS. Death rate from ischaemic heart disease in Western Australian psychiatric patients 1980-1998. *Br J Psychiatry* 2003;182:31-6.
13. Kisely S, Smith M, Lawrence D, Maaten S. Mortality in individuals who have had psychiatric treatment: population-based study in Nova Scotia. *Br J Psychiatry* 2005;187:552-8.
14. Roshanaei-Moghaddam B, Katon W. Premature mortality from general medical illnesses among persons with bipolar disorder: a review. *Psychiatr Serv* 2009;60(2):147-56.
15. Goldstein BI, Fagiolini A, Houck P, Kupfer DJ. Cardiovascular disease and hypertension among adults with bipolar I disorder in the United States. *Bipolar Disord* 2009;11(6):657-62.
16. Angst J, Hengartner MP, Gamma A, von Zerssen D, Angst F. Mortality of 403 patients with mood disorders 48 to 52 years after their psychiatric hospitalisation. *Eur Arch Psychiatry Clin Neurosci*.
17. Fiedorowicz JG, Solomon DA, Endicott J, Leon AC, Li C, Rice JP, et al. Manic/hypomanic symptom burden and cardiovascular mortality in bipolar disorder. *Psychosom Med* 2009;71(6):598-606.
18. Sachs G, Bowden C, Calabrese JR, Ketter T, Thompson T, White R, et al. Effects of lamotrigine and lithium on body weight during maintenance treatment of bipolar I disorder. *Bipolar Disord* 2006;8(2):175-81.

19. Newcomer JW. Medical risk in patients with bipolar disorder and schizophrenia. *J Clin Psychiatry* 2006;67(11):e16.
20. Lasser K, Boyd JW, Woolhandler S, Himmelstein DU, McCormick D, Bor DH. Smoking and mental illness: A population-based prevalence study. *JAMA* 2000;284(20):2606-10.
21. McElroy SL, Frye MA, Suppes T, Dhavale D, Keck PE, Jr., Leverich GS, et al. Correlates of overweight and obesity in 644 patients with bipolar disorder. *J Clin Psychiatry* 2002;63(3):207-13.
22. Kruger S, Shugar G, Cooke RG. Comorbidity of binge eating disorder and the partial binge eating syndrome with bipolar disorder. *Int J Eat Disord* 1996;19(1):45-52.
23. Druss BG, Zhao L, Von Esenwein S, Morrato EH, Marcus SC. Understanding excess mortality in persons with mental illness: 17-year follow up of a nationally representative US survey. *Med Care*;49(6):599-604.
24. Goodrich DE, Lai Z, Lasky E, Burghardt AR, Kilbourne AM. Access to weight loss counseling services among patients with bipolar disorder. *J Affect Disord*;126(1-2):75-9.
25. Sodhi SK, Linder J, Chenard CA, Miller del D, Haynes WG, Fiedorowicz JG. Evidence for accelerated vascular aging in bipolar disorder. *J Psychosom Res*;73(3):175-9.
26. Ryan MC, Collins P, Thakore JH. Impaired fasting glucose tolerance in first-episode, drug-naive patients with schizophrenia. *Am J Psychiatry* 2003;160(2):284-9.
27. Lucae S, Salyakina D, Barden N, Harvey M, Gagne B, Labbe M, et al. P2RX7, a gene coding for a purinergic ligand-gated ion channel, is associated with major depressive disorder. *Hum Mol Genet* 2006;15(16):2438-45.
28. Gidlof O, Smith JG, Melander O, Lovkvist H, Hedblad B, Engstrom G, et al. A common missense variant in the ATP receptor P2X7 is associated with reduced risk of cardiovascular events. *PLoS One*;7(5):e37491.
29. Backlund L, Nikamo P, Hukic DS, Ek IR, Traskman-Bendz L, Landen M, et al. Cognitive manic symptoms associated with the P2RX7 gene in bipolar disorder. *Bipolar Disord*;13(5-6):500-8.
30. Goldstein BI, Kemp DE, Soczynska JK, McIntyre RS. Inflammation and the phenomenology, pathophysiology, comorbidity, and treatment of bipolar disorder: a systematic review of the literature. *J Clin Psychiatry* 2009;70(8):1078-90.
31. Leboyer M, Soreca I, Scott J, Frye M, Henry C, Tamouza R, et al. Can bipolar disorder be viewed as a multi-system inflammatory disease? *J Affect Disord*;141(1):1-10.
32. Rybakowski JK, Wykretowicz A, Heymann-Szlachcinska A, Wysocki H. Impairment of endothelial function in unipolar and bipolar depression. *Biol Psychiatry* 2006;60(8):889-91.
33. Fiedorowicz JG, Palagummi NM, Forman-Hoffman VL, Miller DD, Haynes WG. Elevated prevalence of obesity, metabolic syndrome, and cardiovascular risk factors in bipolar disorder. *Ann Clin Psychiatry* 2008;20(3):131-7.
34. Birkenaes AB, Opjordsmoen S, Brunborg C, Engh JA, Jonsdottir H, Ringen PA, et al. The level of cardiovascular risk factors in bipolar disorder equals that of schizophrenia: a comparative study. *J Clin Psychiatry* 2007;68(6):917-23.
35. Fagiolini A, Frank E, Scott JA, Turkin S, Kupfer DJ. Metabolic syndrome in bipolar disorder: findings from the Bipolar Disorder Center for Pennsylvanians. *Bipolar Disord* 2005;7(5):424-30.

- 1  
2  
3  
4  
5 36. Johannessen L, Strudsholm U, Foldager L, Munk-Jorgensen P. Increased risk of hypertension in patients with bipolar disorder and patients with anxiety  
6 compared to background population and patients with schizophrenia. *J Affect Disord* 2006;95(1-3):13-7.  
7  
8 37. Gothefors D, Adolfsson R, Attvall S, Erlinge D, Jarbin H, Lindstrom K, et al. Swedish clinical guidelines--prevention and management of metabolic risk in  
9 patients with severe psychiatric disorders. *Nord J Psychiatry*;64(5):294-302.  
10 38. Laursen TM, Munk-Olsen T, Agerbo E, Gasse C, Mortensen PB. Somatic hospital contacts, invasive cardiac procedures, and mortality from heart disease  
11 in patients with severe mental disorder. *Arch Gen Psychiatry* 2009;66(7):713-20.  
12 39. Manderbacka K, Arffman M, Sund R, Haukka J, Keskimaki I, Wahlbeck K. How does a history of psychiatric hospital care influence access to coronary care:  
13 a cohort study. *BMJ Open*;2(2):e000831.  
14 40. Adler M, Backlund L, Edman G, Osby U. Symptoms and treatment of bipolar patients in Sweden. *Int J Psychiatry Clin Pract*;16(3):170-7.  
15  
16  
17  
18  
19  
20  
21  
22  
23  
24  
25  
26  
27  
28  
29  
30  
31  
32  
33  
34  
35  
36  
37  
38  
39  
40  
41  
42  
43  
44  
45  
46  
47  
48  
49

## Cardiovascular mortality in bipolar disorder: A population based cohort study in Sweden.

Jeanette Westman *Postdoctoral researcher*<sup>1</sup>, Jonas Hällgren *Statistician*<sup>2</sup>, Kristian Wahlbeck *Professor of psychiatry*<sup>3</sup>, David Erlinge *Professor of cardiology*<sup>4</sup>, Lars Alfredsson *Professor of epidemiology*<sup>5</sup>, Urban Ösby *Senior researcher*<sup>1,6,7,8</sup>

<sup>1</sup>Centre for Family Medicine (CeFAM), Department of Neurobiology, Care Sciences, and Society, Karolinska Institutet, Stockholm, Sweden.

<sup>2</sup>Department of Medical Epidemiology and Biostatistics (MEB), Karolinska Institutet, Stockholm, Sweden.

<sup>3</sup>THL, National Institute for Health and Welfare, Helsinki, Finland.

<sup>4</sup>Department of Cardiology, Lunds Universitet, Lund, Sweden

<sup>5</sup>Institute of Environmental Medicine, Karolinska Institutet, Stockholm, Sweden.

<sup>6</sup>Department of Molecular Medicine and Surgery, Neurogenetics, Karolinska Institutet, Stockholm, Sweden.

<sup>7</sup>Center for Molecular Medicine, Karolinska Institutet, Stockholm, Sweden.

<sup>8</sup>[Department of Psychiatry, Tiohundra AB, Norrtälje, Sweden.](#)

Correspondence: Jeanette Westman, PhD  
Alfred Nobels Allé 12, SE 141 83 Huddinge, Sweden  
Email: [jeanette.westman@ki.se](mailto:jeanette.westman@ki.se)  
Telephone: +46-(0)8-524 800 00  
Fax: +4-(0)8-524 887 06

Word count of text: [2982471](#)

**Formatted:** Font: (Default) Times New Roman, 12 pt, English (U.S.), Superscript

**Formatted:** Font: (Default) Times New Roman, 12 pt, English (U.S.)

**Formatted:** English (U.S.)



## Article summary

### Article focus

- To estimate mortality in cardiovascular disease (CVD) and its subgroups cerebrovascular and coronary heart disease and acute myocardial infarction among 17,101 persons diagnosed with bipolar disorder during 1987 to 2006 in Sweden, compared to the general population in a national register study with a 20-year follow-up.

Formatted: Font: Bold

Formatted: Normal, No bullets or numbering

Formatted: Font: Times New Roman, 12 pt

Formatted: Bulleted + Level: 1 + Aligned at: 0.25" + Indent at: 0.5"

Formatted: Font: Times New Roman, 12 pt

Formatted: Font: Times New Roman, 12 pt

Formatted: Font: Times New Roman, 12 pt

### Key messages

- Persons with bipolar disorder died of CVD approximately ten years early. Excess mortality of both CVD (n=824) and other somatic diseases (n=988) was higher than that of suicide and other external causes (n=675 deaths). Excess mortality from CVD and other somatic diseases was three times higher (1,812 deaths) than suicide and other external unnatural causes (675 deaths). Mortality rate ratios (MRRs) for cerebrovascular disease, coronary heart disease, and acute myocardial infarction, were twice as high compared to the general population. Despite the increased mortality, hospital admissions, admission rate ratios (ARR) for CVD treatment in persons with bipolar disorder were only slightly increased.
- The increased cardiovascular mortality in persons with bipolar disorder calls for renewed efforts more resources to prevent and treat somatic diseases. Specifically, our findings imply that it would be critical to ensure that persons with bipolar disorder receive the same quality care for CVD as the population.

Formatted: Font: Bold

Formatted: Bulleted + Level: 1 + Aligned at: 0.25" + Indent at: 0.5"

Formatted: Bulleted + Level: 1 + Aligned at: 0.25" + Indent at: 0.5"

### Strengths and limitations of this study of this study

- A large national cohort with comprehensive data on patient characteristics was studied. Mortality data from the Swedish cause of death register are of high quality.
- Clinical information on symptoms and treatment were lacking.

Formatted: Font: Bold

Formatted: Font: Bold

Formatted: Bulleted + Level: 1 + Aligned at: 0.25" + Indent at: 0.5"

**ABSTRACT** (word count: 2654)

**Objective:** To estimate cardiovascular mortality among persons with bipolar disorder in Sweden compared to the general population.

**Design:** Population register based cohort study with a 20-year follow-up.

**Setting:** Sweden.

**Participants:** The entire population of Sweden (n=10.6 million) of whom 17,101 persons were diagnosed with bipolar disorder between 1987 and 2006.

**Main outcome measures:** Mortality rate ratios (MRR), excess mortality (excess deaths), cardiovascular disorders (CVD) and specifically cerebrovascular disease, coronary heart disease, ~~and~~ acute myocardial infarction, ~~sudden cardiac deaths,~~ and hospital admission rate ratios (ARR).

**Results:** Persons with bipolar disorder died of CVD approximately ten years earlier than ~~did~~ ~~persons of~~ the general population. ~~More than two~~One thirds (37.83%) of all deaths in persons with bipolar disorder were caused by CVD, ~~and~~ almost half (44%) by other somatic diseases, whereas suicide and other ~~unnatural~~external causes accounted for less ~~than a fifth~~than a third of all deaths (12.78%). Excess mortality of ~~both~~ CVD (n=824) and other somatic diseases (n=988) was ~~three times~~ higher (4,812 deaths) than that of suicide and other ~~external~~ ~~unnatural~~ causes (n=675 deaths). MRRs -for cerebrovascular disease, coronary heart disease, and acute myocardial infarction, were twice as high in persons with bipolar disorder compared to the general population. Despite the increased mortality of CVD, ~~hospital admissions (ARR)s~~ for CVD treatment were only slightly increased in persons with bipolar disorder when compared to the general population.

**Conclusions:** The increased cardiovascular mortality in persons with bipolar disorder calls for ~~renewed efforts~~more resources to prevent and treat somatic diseases in this group. Specifically, our findings further imply that it would be critical to ensure that persons with bipolar disorder receive the same quality care for CVD as persons without bipolar disorder.

## Introduction

Cardiovascular disease (CVD) is the main cause of death in many developed countries.<sup>1</sup> CVD encompasses a broad range of different conditions that are potentially life threatening. In Sweden, although mortality from CVD in the population has almost halved in the last two decades, CVD still accounts for more than 40% of all deaths in the country.<sup>2</sup> Premature death in patients with severe mental health disorders, especially patients with schizophrenia and bipolar disorder, has historically been ~~generally~~-attributed to suicide, ~~rather than CVD, despite~~ However, more recent studies have showing that CVD leads to more reduced~~shorter~~ life spans than does suicide in those patients.<sup>3</sup> Persons with bipolar disorder have an increased risk of CVD and have been observed to die due to CVD twice as often as the general population.<sup>4-6</sup> Although previous studies have shown an association between bipolar disorder and mortality from CVD, few studies have addressed mortality rates in different ~~CVD subgroup~~types of vascular mortality, or examined their use of health care. An improved understanding of the causes behind and magnitude of CVD among bipolar patients is warranted along with an in-depth evaluation of different diagnostic CVD subgroups. The answers to these questions, which are far less investigated than among patients with schizophrenia, are essential in the efforts to address the problem of premature deaths due to CVD in bipolar patients, and they are the focus of the present Swedish national register-based study, which extends earlier Swedish findings<sup>5</sup> both by more specific CVD mortality analyses and more recent patient data.

The aim of this study was to evaluate excess mortality from CVD, such as cerebrovascular disease and coronary heart disease with acute myocardial infarction as its most important component, and also CVD hospital admissions, in ~~people with bipolar disorder~~persons with bipolar disorder -in Sweden between 1987 and 2006 compared to the population.

Field Code Changed

Field Code Changed

Field Code Changed

Field Code Changed

Formatted: Superscript

## Methods

### Cohort and follow-up

All persons who resided in Sweden between the 1<sup>st</sup> of January 1987 and the 31<sup>st</sup> of December 2006 (n=10,631, 208) were identified using the Swedish Total Population Register (TPR). The TPR was established in 1968 and contains information on sex, date and place of birth, date of migration of every resident in Sweden. Information on hospital admission, medical diagnosis, and cause of death was obtained by linking the TRP with the national Swedish Cause-of-Death Register and the National Patient Register (NPR) using each resident's unique personal identification number.

The NPR, which is maintained by the National Board of Health and Welfare, contains information on all hospital in-patient treatments carried out in Sweden since 1987. For psychiatric in-patient care the register has nationwide coverage dating back from 1973. For each hospitalization, the unique national registration number, date of admission and discharge, and diagnosis are registered in NPR. In Sweden, all hospital diagnoses are classified according to the WHO International Classification of Diseases (ICD). Since the diagnostic definitions of affective disorders were substantially changed in ICD-9 and ICD-10 as compared with ICD-8, only patients diagnosed with bipolar disorder according to ICD-9 or ICD-10 were included in the study. Bipolar diagnoses recorded between 1987 and 1996 were identified using ICD-9 (296A, C, E, 298B). From 1997 and later, ICD-10 (F30-F31) was used to identify bipolar diagnoses. The Swedish Cause of Death Register (CDR) includes all individuals who were registered in Sweden at the time of death. The register provides information on date of death as well as main (underlying) and secondary causes of death based on death certificates. Definitions regarding causes of death and ICD codes used in this study are shown in Figure 1.

A total of 20,248 patients admitted to hospital between 1<sup>st</sup> of January 1987 and 31<sup>st</sup> of December 2006 with a main diagnosis of bipolar disorder (ICD-9; ICD-10) were identified in the NPR. Of the 20,248 patients, 3,147 had been previously diagnosed with schizophrenia (ICD-8: 295; ICD-9: 295; ICD-10; F20, F25) and were consequently excluded. Thus, the total risk population of the study comprised 17,101 patients with bipolar disorder. The follow-up period was 20 years (1987-2006). Immigrants were included from the date of immigration to Sweden. Each person was followed until December 31, 2006, or date of death or emigration,

1  
2  
3  
4  
5  
6  
7 depending on which came first. Inclusion in the risk population started from the date of first  
8 hospital admission (discharge diagnosis) during the study period.  
9

### 10 11 **Statistical analysis**

12 Person years at risk, number of cause-specific deaths and hospital admissions due to CVD for  
13 both bipolar patients and the general population were determined. Person time was stratified  
14 by sex, calendar year and age. Mortality rate ratios (MRR) and Admission rate ratios (ARR)  
15 and predicted mortality rates were calculated with corresponding 95% confidence intervals  
16 (CI) using Poisson regression models with the GENMOD procedure using statistical software  
17 SAS (version 9.2). All models were adjusted for or stratified by sex, attained age and year of  
18 follow-up.  
19  
20  
21  
22  
23

24 To calculate the excess mortality for patients with bipolar disorder the observed number of  
25 deaths was compared with the expected number of deaths among patients with bipolar  
26 disorder. The expected number of deaths was calculated by applying age, sex and calendar  
27 specific mortality rates in the general population to the time at risk among the patients.  
28

29 The risk of dying from CVD after first hospital admission was analyzed by estimating cause-  
30 specific survival curves using the Kaplan-Meier method. Additional adjusted hazard ratios  
31 with 95% CIs were estimated using Cox proportional hazard models.  
32  
33  
34

35 When hospital admission due to CVD (Admission Rate Ratios, ARR) was the event of  
36 interest, follow-up ended on the day of first admission. To ensure that the observed cases  
37 were incident, a three-year run-in period was created to compensate for the lack of CVD  
38 coverage in the NPR before 1987. Hence, all bipolar patients analyzed had no hospital  
39 admissions due to CVD recorded for at least three years before follow-up.  
40  
41  
42  
43

## 44 **Results**

### 45 **Causes of death**

46 Total mortality (death from any cause) between 1987 and 2006 in Sweden was more than  
47 twice as high among patients with bipolar disorder compared to the general population (MRR  
48 2.40; 95% CI 2.33-2.47). Specifically, 2,489 excess deaths in patients with bipolar disorder  
49 were observed (Table 1). With mortality causes subdivided into CVD, other somatic, and  
50 [unnatural/external](#) causes of death, we found that men and women with bipolar disorder were  
51  
52  
53  
54  
55  
56  
57  
58  
59  
60

twice as likely to die of CVD compared to the general population (MRR 2.03; 95% CI 1.93-2.13), with 824 excess deaths due to CVD. Mortality from other somatic causes was also doubled (MRR 2.10; 95% CI 2.00-2.19), with 988 excess deaths. Unnatural External causes of death, such as suicide, homicides, and accidents, were increased more than nine times in bipolar patients (MRR 9.66; 95% CI 8.99-10.37), with 675 excess deaths. As far as CVD subgroups were concerned, mortality from coronary heart disease and cerebrovascular disease was twice as high in bipolar patients, with 377 excess deaths (MRR 1.95; 95% CI 1.81-2.09) and 184 excess deaths (MRR 2.00; 95% CI 1.81-2.09), respectively. Mortality from acute myocardial infarction was almost twice as high in bipolar patients (MRR 1.83; 95% CI 1.67-2.01), with 200 excess deaths. Mortality from sudden cardiac death, cardiac arrest/ventricular fibrillation, was also increased (MRR 1.85; 95% CI 1.42-2.41), with 25 excess deaths. Bipolar women and men of all ages had an equally increased mortality from CVD (data not shown).

#### Age and cause of death

MRR by age at death for all causes of death is shown in Fig 2a and subdivided into cardiovascular death (Fig 2b), other somatic death (Fig 2c), suicide and other external causes of death (Fig 2c). Cerebrovascular death (Fig 2e), death by coronary heart disease (Fig 2f), and death from acute myocardial infarction (Fig 2g) are reported separately.

MRR for CVD was increased for bipolar patients across all ages but was particularly pronounced in the young age groups (Figure 2b). Patients with bipolar disorder who died of CVD were younger than people in the general population. The same finding was observed when we subdivided CVD into cerebrovascular disease, coronary heart disease and acute myocardial infarction (Figure 2e-g). For acute myocardial infarction and coronary heart disease the increased risk was most apparent in the 55-65 years age groups (2f-g). In the ages below 50 years the results should be interpreted with caution because there were very few events in these ages. Death by suicide and other unnatural external causes of deaths were 15 times more common among bipolar patients below 30 years of age compared to persons of the same age in the general population (Figure 2d). Overall, the MRR for suicide and other unnatural external causes of deaths decreased with increasing age. However, it should be noted that it remained significantly increased in persons aged between 70-74 years (MRR 6.88; CI 95% 5.06-9.35) (Figure 2d).

8

[Age differences at death between persons with bipolar disorder and the population from coronary heart disease, acute myocardial infarction and cerebrovascular disease is shown in Figure 3a-3c. The earlier age at death for persons with bipolar disorder is clearly shown for all these causes of death.](#)

Formatted: Font Alignment: Top

### Admission rates

Hospital admission rates for CVD among patients with bipolar disorder were similar to those for the general population even though MRR for CVD was almost twice as high, independent of the specific CVD cause (Tables 1 and 2). Survival rates five years after first hospital admission for CVD were significantly lower among bipolar patients than among the general population (Figure 4).

## Discussion

### Key findings

In this nationwide study of mortality among persons with bipolar disorder in Sweden compared to the population, somatic illness was the main cause of death. Bipolar patients died of CVD around ten years earlier than the general population. Mortality from cerebrovascular disease, coronary heart disease, and acute myocardial infarction was twice as high in bipolar patients as in the general population, while the frequency of hospital admissions due to these diseases was not increased. Our findings ~~clearly~~ showed that CVD [in persons with bipolar disorder accounted for 824 excess deaths](#) and other somatic diseases [988 in persons with bipolar disorder accounted for a substantial number of](#) excess deaths, [taken together \(n=1,812\) excess deaths, both](#) larger than suicide and other ~~unnatural~~ [external](#) causes of death (n=675). [Interestingly, sudden cardiac death was also increased.](#)

### Strengths and limitations

The Swedish National Patient Register and Cause of Death Register include everyone who resides in the country and are considered unique, comprehensive and highly credible. Currently more than 99% of all somatic and psychiatric hospital discharges are recorded in the National Patient Register.<sup>7</sup> Swedish hospitals and government agencies are obliged by law to enter medical information in the National Patient Register. All diagnoses in the National Patient and Cause of Death registers were given by patients' doctors using international classification standards (ICD codes). Being register based, this study used information about

Field Code Changed

clinical diagnoses from hospital admissions in Sweden. During the study period, the ICD diagnostic definitions were specific for bipolar disorder. A validation of the Swedish clinical bipolar diagnoses has shown high validity, sufficient for epidemiological studies.<sup>8</sup> One limitation of this study was that it was based on in-patient diagnoses, which may have generated a selective bias towards severely ill patients. However, most individuals at severe stages of bipolar disorder are admitted to hospital in Sweden. [Since medical care is free in Sweden, there is no bias by costs for hospital care leading to differences in health-seeking behavior.](#) In a previous study, we have shown that the number and frequency of hospital admissions due to bipolar disorder remained relatively unchanged in Sweden during recent years, while the overall number of psychiatric admissions was drastically reduced.<sup>9</sup> We did not have access to medical records or information on medical treatment, ~~which would have been of interest since antidepressants use have been linked to increased risk of fatal coronary heart disease.~~<sup>10</sup> In terms of the validity of the data on causes of death, in CVD deaths we found a slightly higher autopsy rate (28%) among patients with bipolar disorder than in the general population (22%). It is unlikely that these small differences affected the outcome of the study. [Although MRR for CVD deaths were generally lower for women than for men but not significantly, the absolute numbers of deaths was larger among women. Thus, the lower MRR for women with bipolar disorder relates to differences in CVD mortality between women and men in the general population.](#)

### Findings from other studies

The findings of this study add to the growing body of evidence that somatic diseases, particularly CVD, contribute to a shorter lifespan among bipolar patients. Findings from several large register-based studies from different parts of the world indicate that cardiovascular disease is responsible for the majority of excess deaths, with up to 2.5-fold increased mortality.<sup>3 5 6 10-14 3 5 6 11-15</sup> Studies using registers from the Nordic countries have shown that ~~in~~ bipolar patients run almost twice the risk of dying from CVD than do persons in the general population, the mechanisms for which are currently unknown.<sup>4 5</sup> [There is also a growing body of evidence from studies in other countries, and similar findings have been observed in a representative study of the US population.](#)<sup>15</sup> ~~(Goldstein et al 2009).~~ [Studies have shown a higher cardiovascular mortality in persons with bipolar disorder type I compared to bipolar disorder type II or major depressive disorder.](#)<sup>16 17</sup> ~~(Fiedorowicz 2009, Angst 2012).~~ [In our Swedish data, bipolar disorder type I, can not be separated from bipolar disorder type II. However, patients with bipolar disorder type I are much more likely to be hospitalized and](#)

Field Code Changed

Field Code Changed

Field Code Changed

Field Code Changed

Formatted: Superscript

Formatted: Superscript



thus to be included in our sample. Earlier age of CVD has been shown in several studies<sup>15</sup> and is also confirmed in which findings of increased cardiovascular death at a younger age compared to the population in Sweden also confirm findings of increased cardiovascular disease at a younger age compared to the population. Possible risk factors for the increased mortality from CVD among bipolar patients may include adverse effects of medication,<sup>18 19 46</sup> high levels of smoking,<sup>20 48</sup> unhealthy diet,<sup>21 22 19 20</sup> lack of physical activity,<sup>21 49</sup> and low social-economic status,<sup>23 24</sup> and lower rates of nutritional counseling.<sup>24</sup> Studies have shown that bipolar disorder patients deviate from age-based norms on arterial stiffness measures.<sup>25</sup>

In addition, effects of genetic associations, such as those reported between Type 2 diabetes, CHD and schizophrenia,<sup>26 22</sup> could not be excluded. One of the most important locuses of genetic polymorphisms linked to bipolar disease and depression is around the ATP-activated ion-channel receptor *P2X7*.<sup>27 23</sup> Recently, a polymorphism in the *P2X7* gene was linked to increased risk of stroke and acute myocardial infarction,<sup>28 24</sup> and the same polymorphism has also recently been shown to be linked to cognitive symptoms in bipolar disorder,<sup>29 25</sup> indicating that common genetic factors could have effect on both cardiovascular disease and bipolar disorder. Also, inflammation has been pointed out as a potential biological cause of increased CVD in bipolar disorder.<sup>30 31</sup> together with endothelial dysfunction.<sup>32</sup>

Formatted: Superscript

Field Code Changed

Formatted: Superscript

Formatted: Superscript

Field Code Changed

Field Code Changed

Field Code Changed

Formatted: Superscript

Formatted: Superscript

**CVD undertreated in bipolar disorder persons with bipolar disorder**

Studies of patients with bipolar disorder have shown that the patients run an increased risk of metabolic syndrome,<sup>33 26</sup> i.e. increased blood glucose,<sup>34 27</sup> and cholesterol levels,<sup>35 28</sup> higher blood pressure,<sup>36 29</sup> and higher prevalence of overweight and obesity,<sup>21 49</sup> closely associated with CVD. To prevent and treat metabolic disorders in patients with severe mental illnesses such as bipolar disorder, new guidelines have been drawn up for clinicians in Sweden.<sup>37 30</sup> However, the substantially younger age at CVD disease among persons with bipolar disorder compared to the population need to be further emphasized. The effects of those guidelines are still to be evaluated.

Field Code Changed

Our finding that patients with bipolar disorder showed only slightly increased hospital admissions rates for CVD despite their twice as high cardiovascular mortality, strongly suggests that CVD is undertreated in bipolar patients when compared to the general population. In a Danish study, the rates of invasive heart disease procedures were 40% lower among persons with bipolar disorder than in the general population.<sup>4</sup> Although the younger

Formatted: Superscript

age at cardiac events in bipolar disorder compared to the population may reduce detection, this possible contributing factor is unlikely to cause the reduced rates of invasive heart procedures. Sudden cardiac mortality from cardiac arrest/ventricular fibrillation was increased among patients with bipolar disorder (MRR: 1.85), but the 25 excess cases does not explain the difference in hospital admissions in terms of increased sudden death before hospitalization. Thus, the reasons for CVD undertreatment in bipolar disorder is not explained by the current findings. Our register data alone cannot offer an explanation for this finding. In our study, the MRR and ARR patient populations are slightly different, in the respect that the ARR patients are identified at their first index admission, while the MRR patients may have several admissions, and thus being more severely affected. Unequal access to health care (i.e. receiving cardiac treatment of lower quality) for reasons other than financial has been previously suggested as a contributor to excess CVD mortality in patients with severe mental disorders, such as schizophrenia,<sup>3834</sup> and may be indicated by our findings of increased mortality after discharge from hospital compared to the population. These factors have not been studied extensively in bipolar patients. Health care in Sweden is free and is financed primarily through taxes. Therefore, it is unlikely that patients with bipolar disorder do not seek hospital care for lack of financial means.

Formatted: Font color: Text 1

Field Code Changed

Many mechanisms can contribute to the under-treatment of CVD among people with bipolar disorder. Our results indicate a failure of the health care system to identify and address the health needs of those patients, which has also been shown in other studies of people with severe mental disorders.<sup>3932</sup> The levels of CVD mortality in our bipolar persons are similar to those in schizophrenia, where adverse effects of antipsychotic medication have been considered the main contributing factor. When compared with schizophrenia, a recent study of bipolar disorder in Stockholm County found only 29% of bipolar patients medicating with antipsychotics, as compared to practically all schizophrenia patients, which raises the question of the importance of adverse effects of antipsychotics in CVD.<sup>4033</sup>

Field Code Changed

### Conclusions

The observed number of deaths from cardiovascular diseases in patients with bipolar disorders was almost twice as the expected number when comparing with the general population, suggesting that more resources are needed for the prevention of these diseases in this patient group. Targeted interventions by effective cooperation between primary health care and psychiatric professionals would be crucial in the efforts to reduce excess CVD

12

1  
2  
3  
4  
5  
6 mortality in patients with bipolar disorder. Finally, effective cardiac treatment would ensure  
7  
8 | longevity and improved quality of life for ~~bipolar~~ patients with bipolar disorder.  
9  
10  
11  
12  
13  
14  
15  
16  
17  
18  
19  
20  
21  
22  
23  
24  
25  
26  
27  
28  
29  
30  
31  
32  
33  
34  
35  
36  
37  
38  
39  
40  
41  
42  
43  
44  
45  
46  
47  
48  
49  
50  
51  
52  
53  
54  
55  
56  
57  
58  
59  
60

1  
2  
3  
4  
5  
6  
7  
8  
9  
10  
11  
12  
13  
14  
15  
16  
17  
18  
19  
20  
21  
22  
23  
24  
25  
26  
27  
28  
29  
30  
31  
32  
33  
34  
35  
36  
37  
38  
39  
40  
41  
42  
43  
44  
45  
46  
47  
48  
49  
50  
51  
52  
53  
54  
55  
56  
57  
58  
59  
60

13

For peer review only

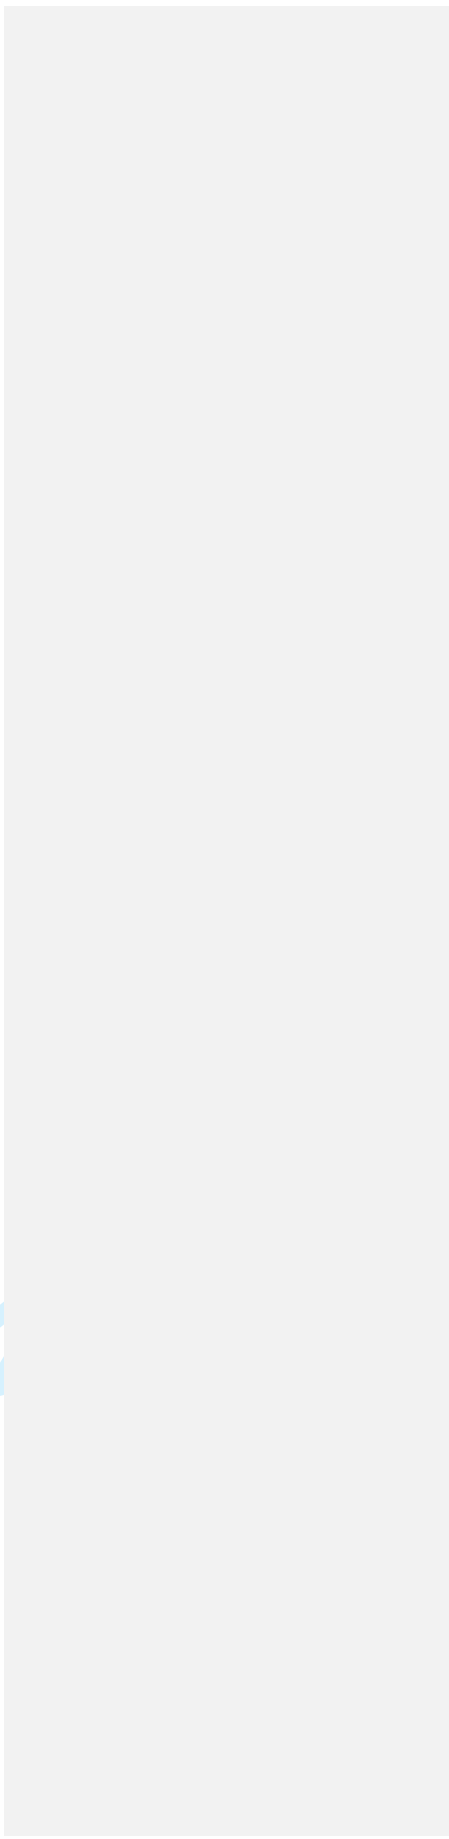

**Contributors:** UÖ had the idea of the study and is guarantor of the study together with JH, who has performed the statistical analyses. JW has contributed to the design of the study and drafted the manuscript together with UÖ. KW, DE and LA have contributed to the design of the study and with revisions of the manuscript. All authors have approved the final version of the study.

**Funding:** This paper was supported by Swedish Council for Working Life and Social Research (grant number FAS 2008-0885) and Stockholm County Council (Grant number PPG -20120263). The study was conducted and analyzed independently from its funders.

**Competing interests:** All authors have completed the ICMJE uniform disclosure form (available on request from the corresponding author). JW, KW, LA, DE, UÖ has declared no support from any organization for the submitted work, no financial relationship with any organizations that would have interest in the submitted work in the previous three years, and no other activities that could appear to have influenced the submitted work. UÖ has declared traveling expenses from Janssen-Cilag for attending a course in October 2012 unrelated to the study.

**Ethical approval:** This study was approved by the ethical review board in Stockholm County. The ethical review board determined that informed consent from participating individuals was not required.

**Data sharing:** The analysis data set for this study is available from the National Board of Health and Welfare (Socialstyrelsen) in Sweden. Please contact JH for further information.

**Licence for publication:** The Corresponding Author has the right to grant on behalf of all authors and does grant on behalf of all authors, an exclusive licence on a worldwide basis to the BMJ Publishing Group Ltd and its Licensees to permit this article (if accepted) to be published in BMJ editions and any other BMJ PGL products and sublicences to exploit all subsidiary rights, as set out in our licence ( <http://resources.bmj.com/bmj/authors/checklists-forms/licence-for-publication>).

Figure 1. ICD-coding and disease classification of disease and mortality.

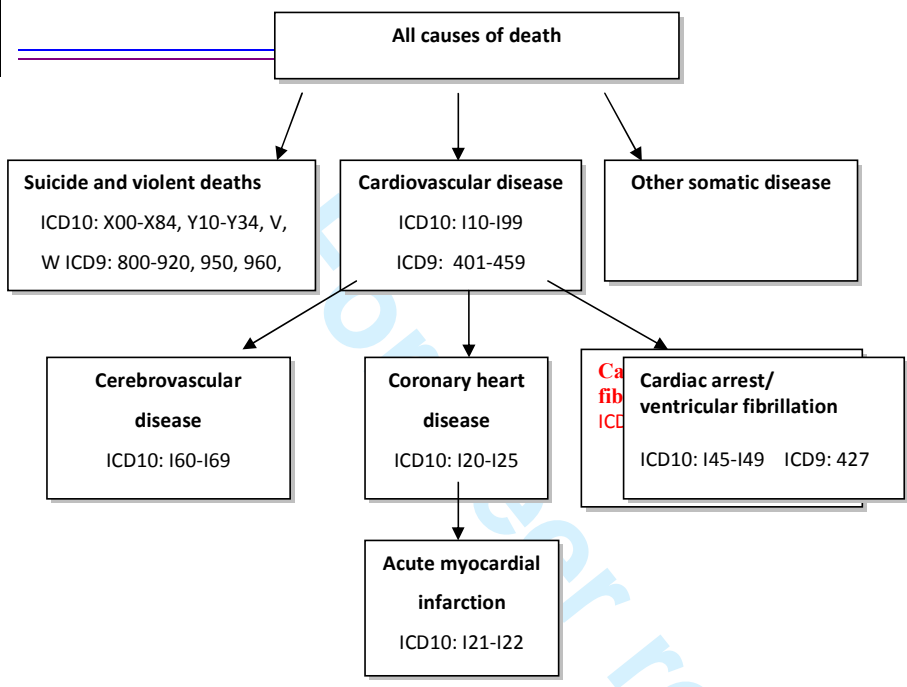

1  
2  
3  
4  
5  
6  
7  
8  
9  
10  
11  
12  
13  
14  
15  
16  
17  
18  
19  
20  
21  
22  
23  
24  
25  
26  
27  
28  
29  
30  
31  
32  
33  
34  
35  
36  
37  
38  
39  
40  
41  
42  
43  
44  
45  
46  
47  
48  
49  
50  
51  
52  
53  
54  
55  
56  
57  
58  
59  
60

Table 1. Mortality rate ratios for bipolar patients between 1987 and 2006

| Cause of death                                     | Men   |                   | Women |                    | Total (both sexes) |                   |                       |
|----------------------------------------------------|-------|-------------------|-------|--------------------|--------------------|-------------------|-----------------------|
|                                                    | Cases | MRR (95% CI)      | Cases | MRR (95% CI)       | Cases              | MRR (95% CI)      | Excess cases (95% CI) |
| All causes of death                                | 1874  | 2.48 (2.37-2.59)  | 2393  | 2.34 (2.25-2.44)   | 4267               | 2.40 (2.33-2.47)  | 2489 (2361-2617)      |
| Cardiovascular disease                             | 733   | 2.16 (2.01-2.33)  | 892   | 1.93 (1.81-2.06)   | 1625               | 2.03 (1.93-2.13)  | 824 (745-903)         |
| Other somatic deaths                               | 735   | 1.97 (1.83-2.11)  | 1154  | 2.19 (2.06-2.32)   | 1889               | 2.10 (2.00-2.19)  | 988 (902-1073)        |
| <b>Unnatural Suicide and other External deaths</b> | 406   | 9.37 (8.50-10.33) | 347   | 10.02 (9.01-11.13) | 753                | 9.66 (8.99-10.37) | 675 (621-729)         |
| Cerebrovascular disease                            | 144   | 2.29 (1.94-2.70)  | 224   | 1.86 (1.63-2.12)   | 368                | 2.00 (1.81-2.22)  | 184 (147-222)         |
| Coronary heart disease                             | 385   | 2.00 (1.81-2.21)  | 391   | 1.89 (1.71-2.09)   | 776                | 1.95 (1.81-2.09)  | 377 (323-432)         |
| Acute myocardial infarction                        | 227   | 1.89 (1.66-2.15)  | 213   | 1.78 (1.55-2.03)   | 440                | 1.83 (1.67-2.01)  | 200 (159-241)         |
| <b>Cardiac arrest/-Ventricular fibrillation</b>    | 23    | 2.29 (1.52-3.45)  | 32    | 1.62 (1.15-2.30)   | 55                 | 1.85 (1.42-2.41)  | 25 (12-42)            |
| -                                                  | -     | -                 | -     | -                  | -                  | -                 | -                     |

16

Formatted Table

Formatted: English (U.S.)

Formatted: English (U.S.)

Formatted: Font color: Red

Formatted Table

For peer review only

Table 2. Admission rate ratios for bipolar patients during 1990 to 2006

| Hospital admissions         | Men   |                  | Women |                  | Total (both sexes) |                  |                       |
|-----------------------------|-------|------------------|-------|------------------|--------------------|------------------|-----------------------|
|                             | Cases | ARR (95% CI)     | Cases | ARR (95% CI)     | Cases              | ARR (95% CI)     | Excess cases (95% CI) |
| Cardiovascular disease      | 540   | 1.27 (1.16-1.38) | 696   | 1.33 (1.24-1.43) | 1236               | 1.30 (1.23-1.38) | 287 (218-356)         |
| Cerebrovascular disease     | 179   | 1.32 (1.14-1.53) | 271   | 1.43 (1.27-1.62) | 450                | 1.39 (1.26-1.52) | 125 (84-167)          |
| Coronary heart disease      | 212   | 1.02 (0.89-1.17) | 207   | 1.06 (0.92-1.21) | 419                | 1.04 (0.94-1.14) | 15 (-25-55)           |
| Acute myocardial infarction | 133   | 0.96 (0.81-1.14) | 137   | 1.11 (0.94-1.31) | 270                | 1.03 (0.92-1.16) | 8 (-24-41)            |

Review only



Figure 2a. Mortality Rate Ratios (MRR) for all causes of death by age at death in bipolar disorder patients and the general population.

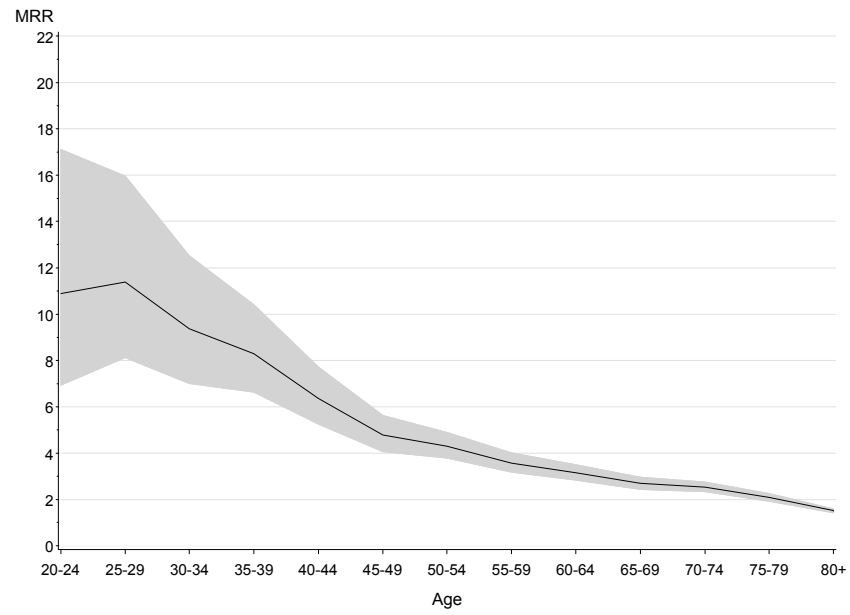

Review only

Figure 2b. Mortality Rate Ratios (MRR) for cardiovascular death by age at death in ~~bipolar disorder~~ persons with bipolar disorder patients and the general population.

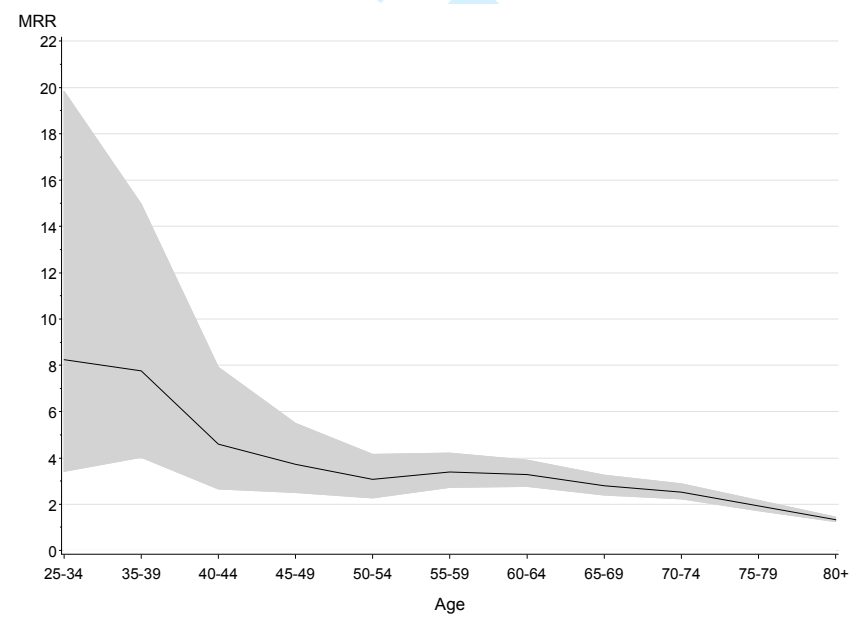

Review only

Formatted: Justified

Formatted: Font: Bold, Font color: Text 1

Formatted: Left

1  
2  
3  
4  
5  
6  
7  
8  
9  
10  
11  
12  
13  
14  
15  
16  
17  
18  
19  
20  
21  
22  
23  
24  
25  
26  
27  
28  
29  
30  
31  
32  
33  
34  
35  
36  
37  
38  
39  
40  
41  
42  
43  
44  
45  
46  
47  
48  
49

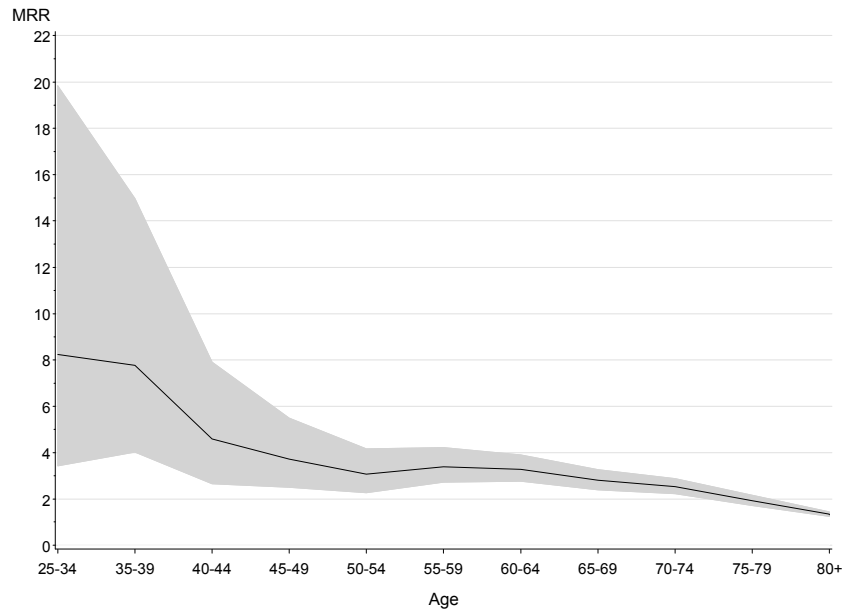

Figure 2c. Mortality Rate Ratios (MRR) for other somatic death by age at death in patients with bipolar disorder and the general population.

1  
2  
3  
4  
5  
6  
7  
8  
9  
10  
11  
12  
13  
14  
15  
16  
17  
18  
19  
20  
21  
22  
23  
24  
25  
26  
27  
28  
29  
30  
31  
32  
33  
34  
35  
36  
37  
38  
39  
40  
41  
42  
43  
44  
45  
46  
47  
48  
49

21

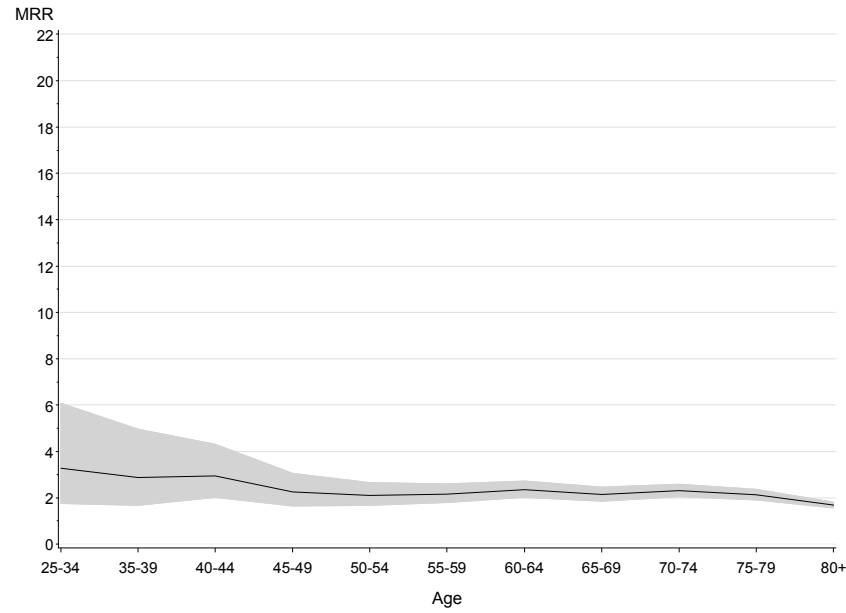

Review only

Figure 2d. Mortality Rate Ratios (MRR) of suicide and other unnatural external causes of deaths by age at death in patients with bipolar disorder and the general population.

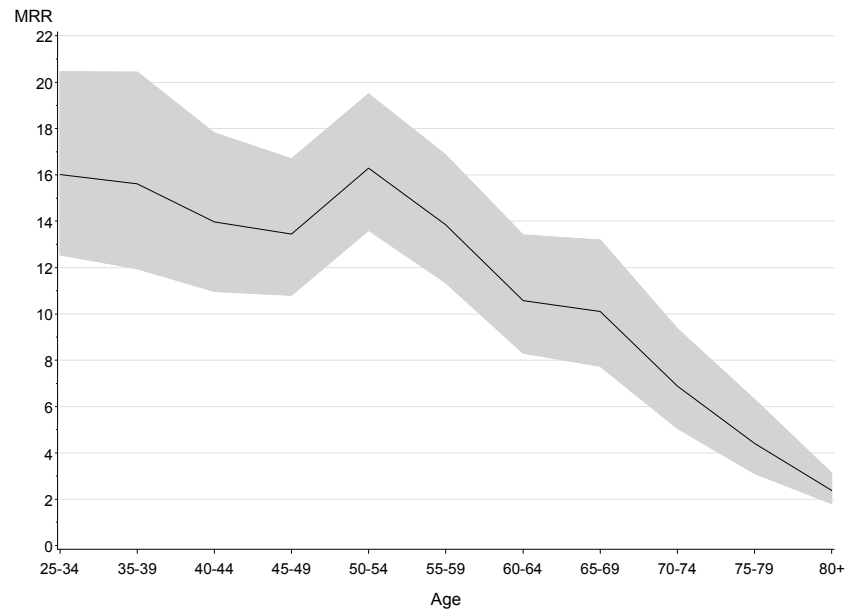

Review only

Figure 2e. Mortality Rate Ratios (MRR) of cerebrovascular disease by age at death in patients with bipolar disorder and the general population.

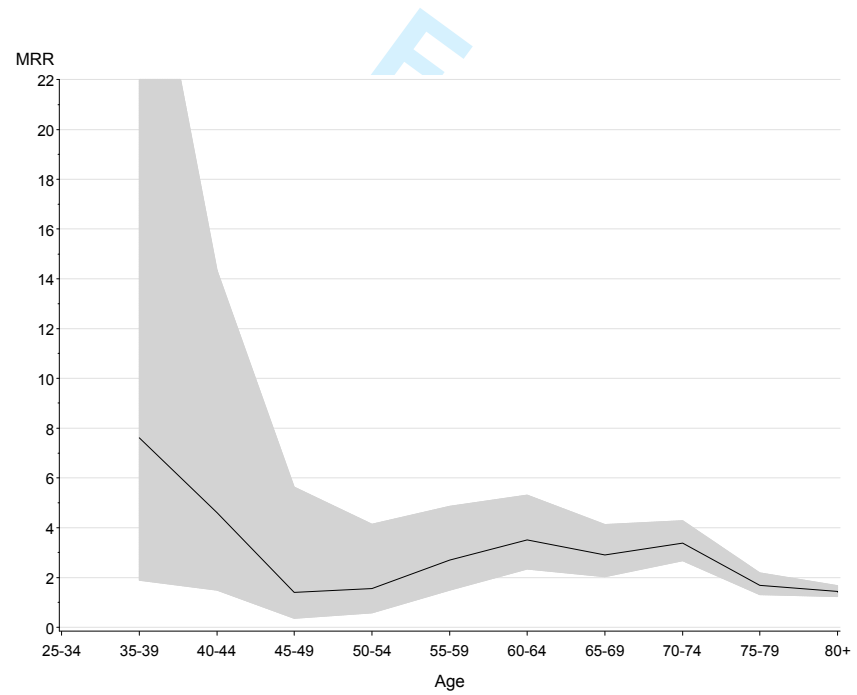

Figure 2f. Mortality Rate Ratios (MRR) of coronary heart disease by age at death in patients with bipolar disorder and the general population.

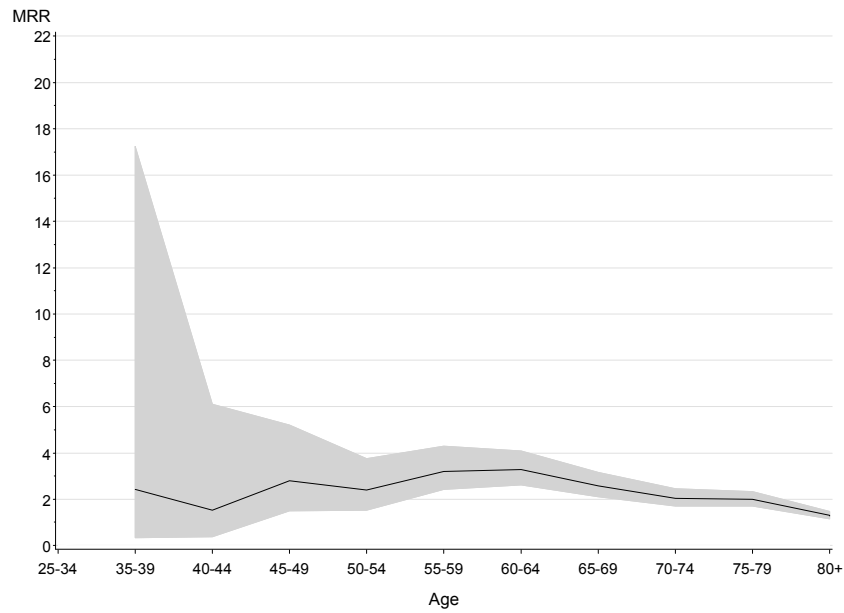

Review only

Figure 2g. Mortality Rate Ratios (MRR) of acute myocardial infarction by age at death in patients with bipolar disorder and the general population.

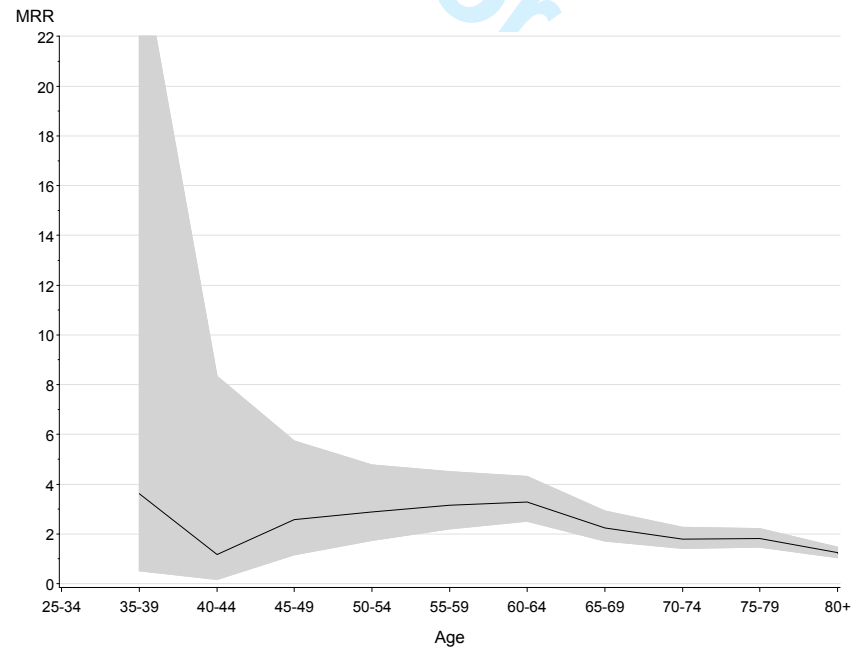

For review only



Figure 3a. Mortality of coronary heart disease per 1000 person-years in patients with bipolar disorder and the general population adjusting for sex and calendar year.

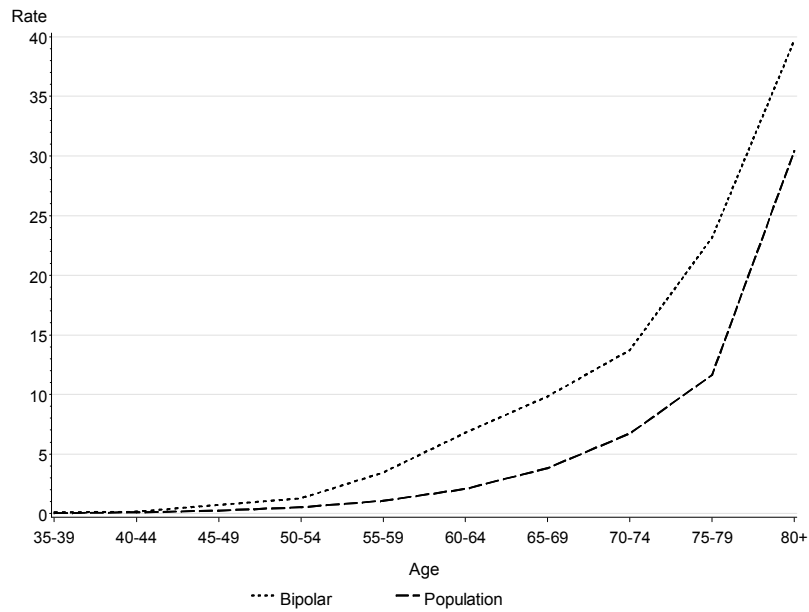

Figure 3b. Acute myocardial infarction

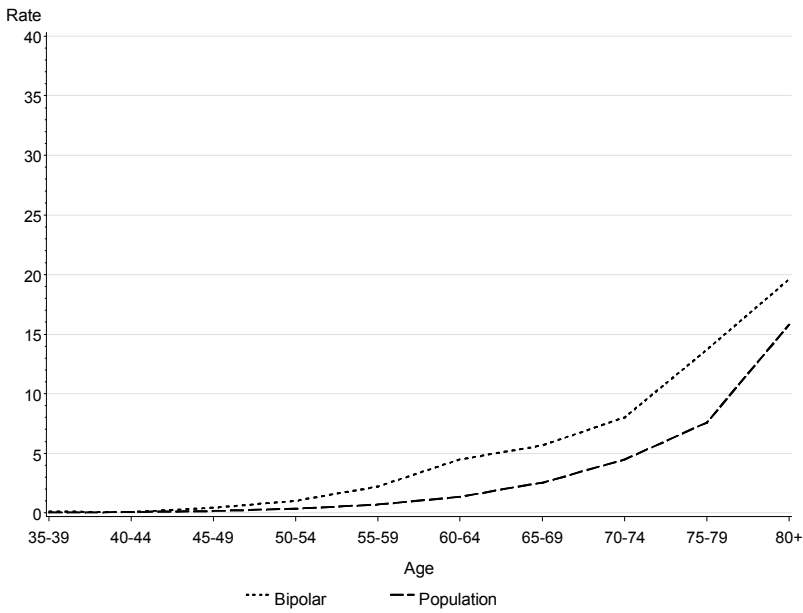

Review only

Figure 3c. Cerebrovascular disease

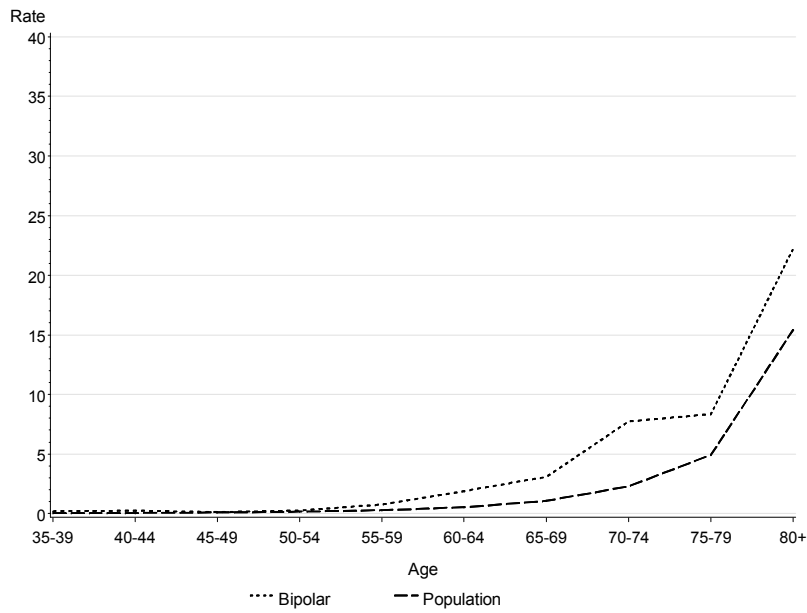

Figure 4. Five-year survival of cardiovascular disease after discharge from first cardiovascular admission stratified by age at hospital contact.

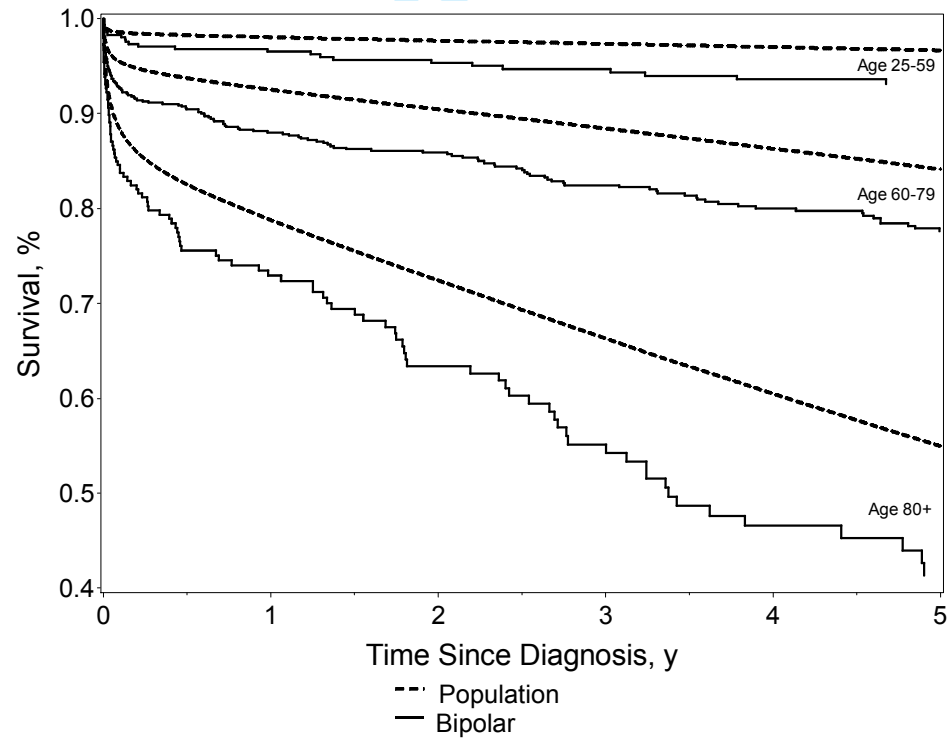

view only

Formatted: Tab stops: 5.31", Left

## References

1. World Health Organisation. Global atlas on cardiovascular disease prevention and control. Policies, strategies and interventions., 2011.
2. Socialstyrelsen. Folkhälsorapport 2009 (The National Public Health Report 2009) Stockholm: The National Board of Health and Welfare in Sweden, 2009.
3. Laursen TM. Life expectancy among persons with schizophrenia or bipolar affective disorder. *Schizophr Res*;131(1-3):101-4.
4. Laursen TM, Nordentoft M. Heart disease treatment and mortality in schizophrenia and bipolar disorder - changes in the Danish population between 1994 and 2006. *J Psychiatr Res*;45(1):29-35.
5. Osby U, Brandt L, Correia N, Ekblom A, Sørensen P. Excess mortality in bipolar and unipolar disorder in Sweden. *Arch Gen Psychiatry* 2001;58(9):844-50.
6. Laursen TM, Munk-Olsen T, Nordentoft M, Mortensen PB. Increased mortality among patients admitted with major psychiatric disorders: a register-based study comparing mortality in unipolar depressive disorder, bipolar affective disorder, schizoaffective disorder, and schizophrenia. *J Clin Psychiatry* 2007;68(6):899-907.
7. Ludvigsson JF, Andersson E, Ekblom A, Feychting M, Kim JL, Reuterwall C, et al. External review and validation of the Swedish national inpatient register. *BMC Public Health*;11:450.
8. Sellgren C, Landén M, Lichtenstein P, Hultman CM, Langström N. Validity of bipolar disorder hospital discharge diagnoses: file review and multiple register linkage in Sweden. *Acta Psychiatr Scand*;124(6):447-53.
9. Osby U, Tiainen A, Backlund L, Edman G, Adler M, Hallgren J, et al. Psychiatric admissions and hospitalization costs in bipolar disorder in Sweden. *J Affect Disord* 2009;115(3):315-22.
10. McIntyre RS, Danilewitz M, Liao SS, Kemp DE, Nguyen HT, Kahn LS, et al. Bipolar disorder and metabolic syndrome: an international perspective. *J Affect Disord*;126(3):366-87.
11. Zilber N, Schufman N, Lerner Y. Mortality among psychiatric patients--the groups at risk. *Acta Psychiatr Scand* 1989;79(3):248-56.
12. Lawrence DM, Holman CD, Jablensky AV, Hobbs MS. Death rate from ischaemic heart disease in Western Australian psychiatric patients 1980-1998. *Br J Psychiatry* 2003;182:31-6.
13. Kisely S, Smith M, Lawrence D, Maaten S. Mortality in individuals who have had psychiatric treatment: population-based study in Nova Scotia. *Br J Psychiatry* 2005;187:552-8.

Formatted: Tab stops: 5.31", Left

Formatted: Font: Italic

1  
2  
3  
4  
5  
6  
7  
8  
9  
10  
11  
12  
13  
14  
15  
16  
17  
18  
19  
20  
21  
22  
23  
24  
25  
26  
27  
28  
29  
30  
31  
32  
33  
34  
35  
36  
37  
38  
39  
40  
41  
42  
43  
44  
45  
46  
47  
48  
49

14. Roshanaei-Moghaddam B, Katon W. Premature mortality from general medical illnesses among persons with bipolar disorder: a review. *Psychiatr Serv* 2009;60(2):147-56.

15. Goldstein BI, Fagiolini A, Houck P, Kupfer DJ. Cardiovascular disease and hypertension among adults with bipolar I disorder in the United States. *Bipolar Disord* 2009;11(6):657-62.

16. Angst J, Hengartner MP, Gamma A, von Zerssen D, Angst F. Mortality of 403 patients with mood disorders 48 to 52 years after their psychiatric hospitalisation. *Eur Arch Psychiatry Clin Neurosci*.

17. Fiedorowicz JG, Solomon DA, Endicott J, Leon AC, Li C, Rice JP, et al. Manic/hypomanic symptom burden and cardiovascular mortality in bipolar disorder. *Psychosom Med* 2009;71(6):598-606.

18. Sachs G, Bowden C, Calabrese JR, Ketter T, Thompson T, White R, et al. Effects of lamotrigine and lithium on body weight during maintenance treatment of bipolar I disorder. *Bipolar Disord* 2006;8(2):175-81.

19. Newcomer JW. Medical risk in patients with bipolar disorder and schizophrenia. *J Clin Psychiatry* 2006;67(11):e16.

20. Lasser K, Boyd JW, Woolhandler S, Himmelstein DU, McCormick D, Bor DH. Smoking and mental illness: A population-based prevalence study. *JAMA* 2000;284(20):2606-10.

21. McElroy SL, Frye MA, Suppes T, Dhavale D, Keck PE, Jr., Leverich GS, et al. Correlates of overweight and obesity in 644 patients with bipolar disorder. *J Clin Psychiatry* 2002;63(3):207-13.

22. Kruger S, Shugar G, Cooke RG. Comorbidity of binge eating disorder and the partial binge eating syndrome with bipolar disorder. *Int J Eat Disord* 1996;19(1):45-52.

23. Druss BG, Zhao L, Von Esenwein S, Morrato EH, Marcus SC. Understanding excess mortality in persons with mental illness: 17-year follow up of a nationally representative US survey. *Med Care*;49(6):599-604.

24. Goodrich DE, Lai Z, Lasky E, Burghardt AR, Kilbourne AM. Access to weight loss counseling services among patients with bipolar disorder. *J Affect Disord*;126(1-2):75-9.

25. Sodhi SK, Linder J, Chenard CA, Miller del D, Haynes WG, Fiedorowicz JG. Evidence for accelerated vascular aging in bipolar disorder. *J Psychosom Res*;73(3):175-9.

26. Ryan MC, Collins P, Thakore JH. Impaired fasting glucose tolerance in first-episode, drug-naive patients with schizophrenia. *Am J Psychiatry* 2003;160(2):284-9.

27. Lucae S, Salyakina D, Barden N, Harvey M, Gagne B, Labbe M, et al. P2RX7, a gene coding for a purinergic ligand-gated ion channel, is associated with major depressive disorder. *Hum Mol Genet* 2006;15(16):2438-45.

28. Gidlof O, Smith JG, Melander O, Lovkvist H, Hedblad B, Engstrom G, et al. A common missense variant in the ATP receptor P2X7 is associated with reduced risk of cardiovascular events. *PLoS One*;7(5):e37491.

29. Backlund L, Nikamo P, Hukic DS, Ek IR, Traskman-Bendz L, Landen M, et al. Cognitive manic symptoms associated with the P2RX7 gene in bipolar disorder. *Bipolar Disord*;13(5-6):500-8.

30. Goldstein BI, Kemp DE, Soczynska JK, McIntyre RS. Inflammation and the phenomenology, pathophysiology, comorbidity, and treatment of bipolar disorder: a systematic review of the literature. *J Clin Psychiatry* 2009;70(8):1078-90.

Formatted: Font: Italic

Formatted: Font: Italic, Swedish (Sweden)

Formatted: Swedish (Sweden)

Formatted: Font: Italic

Formatted: Font: Italic

Formatted: Font: Italic, Swedish (Sweden)

Formatted: Swedish (Sweden)

Formatted: Font: Italic, Swedish (Sweden)

Formatted: Swedish (Sweden)

Formatted: Swedish (Sweden)

Formatted: Font: Italic, Swedish (Sweden)

Formatted: Swedish (Sweden)

Formatted: Font: Italic

31. Leboyer M, Soreca I, Scott J, Frye M, Henry C, Tamouza R, et al. Can bipolar disorder be viewed as a multi-system inflammatory disease? *J Affect Disord*;141(1):1-10.

32. Rybakowski JK, Wykretowicz A, Heymann-Szlachcinska A, Wysocki H. Impairment of endothelial function in unipolar and bipolar depression. *Biol Psychiatry* 2006;60(8):889-91.

33. Fiedorowicz JG, Palagummi NM, Forman-Hoffman VL, Miller DD, Haynes WG. Elevated prevalence of obesity, metabolic syndrome, and cardiovascular risk factors in bipolar disorder. *Ann Clin Psychiatry* 2008;20(3):131-7.

34. Birkenaes AB, Opjordsmoen S, Brunborg C, Engh JA, Jonsdottir H, Ringen PA, et al. The level of cardiovascular risk factors in bipolar disorder equals that of schizophrenia: a comparative study. *J Clin Psychiatry* 2007;68(6):917-23.

35. Fagiolini A, Frank E, Scott JA, Turkin S, Kupfer DJ. Metabolic syndrome in bipolar disorder: findings from the Bipolar Disorder Center for Pennsylvanians. *Bipolar Disord* 2005;7(5):424-30.

36. Johannessen L, Strudsholm U, Foldager L, Munk-Jorgensen P. Increased risk of hypertension in patients with bipolar disorder and patients with anxiety compared to background population and patients with schizophrenia. *J Affect Disord* 2006;95(1-3):13-7.

37. Gothefors D, Adolfsson R, Attvall S, Erlinge D, Jarbin H, Lindstrom K, et al. Swedish clinical guidelines--prevention and management of metabolic risk in patients with severe psychiatric disorders. *Nord J Psychiatry*;64(5):294-302.

38. Laursen TM, Munk-Olsen T, Agerbo E, Gasse C, Mortensen PB. Somatic hospital contacts, invasive cardiac procedures, and mortality from heart disease in patients with severe mental disorder. *Arch Gen Psychiatry* 2009;66(7):713-20.

39. Manderbacka K, Arffman M, Sund R, Haukka J, Keskimaki I, Wahlbeck K. How does a history of psychiatric hospital care influence access to coronary care: a cohort study. *BMJ Open*;2(2):e000831.

40. Adler M, Backlund L, Edman G, Osby U. Symptoms and treatment of bipolar patients in Sweden. *Int J Psychiatry Clin Pract*;16(3):170-7.

1. World Health Organisation. Global atlas on cardiovascular disease prevention and control. Policies, strategies and interventions., 2011.

2. Socialstyrelsen. Folkhälsorapport 2009 (The National Public Health Report 2009) Stockholm: The National Board of Health and Welfare in Sweden, 2009.

3. Laursen TM. Life expectancy among persons with schizophrenia or bipolar affective disorder. *Schizophr Res*;131(1-3):101-4.

4. Laursen TM, Nordentoft M. Heart disease treatment and mortality in schizophrenia and bipolar disorder—changes in the Danish population between 1994 and 2006. *J Psychiatr Res*;45(1):29-35.

5. Osby U, Brandt L, Correia N, et al. Excess mortality in bipolar and unipolar disorder in Sweden. *Arch Gen Psychiatry* 2001;58(9):844-50.

6. Laursen TM, Munk-Olsen T, Nordentoft M, et al. Increased mortality among patients admitted with major psychiatric disorders: a register-based study comparing mortality in unipolar depressive disorder, bipolar affective disorder, schizoaffective disorder, and schizophrenia. *J Clin Psychiatry* 2007;68(6):899-907.

7. Ludvigsson JF, Andersson E, Ekblom A, et al. External review and validation of the Swedish national inpatient register. *BMC Public Health*;11:450.

8. Sellgren C, Landen M, Lichtenstein P, et al. Hultman CM, Langstrom N. Validity of bipolar disorder hospital discharge diagnoses: file review and multiple register linkage in Sweden. *Acta Psychiatr Scand*;124(6):447-53.

9. Osby U, Tiainen A, Backlund L, et al. Psychiatric admissions and hospitalization costs in bipolar disorder in Sweden. *J Affect Disord* 2009;115(3):315-22.

Formatted: Font: Italic

Formatted: Font: Italic

Formatted: Font: Italic, Swedish (Sweden)

Formatted: Swedish (Sweden)

Formatted: Font: Italic

Formatted: Font: Italic

Formatted: Font: Italic

Formatted: Font: Italic, Swedish (Sweden)

Formatted: Swedish (Sweden)

Formatted: Font: Italic

Formatted: Font: Italic

Formatted: Font: Italic

Formatted: Indent: Left: 0", Hanging: 0.5", Line spacing: single

Formatted: English (U.S.)

Formatted: English (U.S.)

10. Whang W, Kubzansky LD, Kawachi I, et al. Depression and risk of sudden cardiac death and coronary heart disease in women: results from the Nurses' Health Study. *J Am Coll Cardiol* 2009;53(11):950-8.
11. McIntyre RS, Danilewitz M, Liauw SS, et al. Bipolar disorder and metabolic syndrome: an international perspective. *J Affect Disord*;126(3):366-87.
12. Zilber N, Schufman N, Lerner Y. Mortality among psychiatric patients—the groups at risk. *Acta Psychiatr Scand* 1989;79(3):248-56.
13. Lawrence DM, Holman CD, Jablensky AV, et al. Death rate from ischaemic heart disease in Western Australian psychiatric patients 1980-1998. *Br J Psychiatry* 2003;182:31-6.
14. Kisely S, Smith M, Lawrence D, et al. Mortality in individuals who have had psychiatric treatment: population-based study in Nova Scotia. *Br J Psychiatry* 2005;187:552-8.
15. Roshanaei-Moghaddam B, Katon W. Premature mortality from general medical illnesses among persons with bipolar disorder: a review. *Psychiatr Serv* 2009;60(2):147-56.
16. Sachs G, Bowden C, Calabrese JR, et al. Effects of lamotrigine and lithium on body weight during maintenance treatment of bipolar I disorder. *Bipolar Disord* 2006;8(2):175-81.
17. Newcomer JW. Medical risk in patients with bipolar disorder and schizophrenia. *J Clin Psychiatry* 2006;67(11):e16.
18. Lasser K, Boyd JW, Woolhandler S, et al. Smoking and mental illness: A population-based prevalence study. *JAMA* 2000;284(20):2606-10.
19. McElroy SL, Frye MA, Suppes T, et al. Correlates of overweight and obesity in 644 patients with bipolar disorder. *J Clin Psychiatry* 2002;63(3):207-13.
20. Kruger S, Shugar G, Cooke RG. Comorbidity of binge eating disorder and the partial binge eating syndrome with bipolar disorder. *Int J Eat Disord* 1996;19(1):45-52.
21. Druss BG, Zhao L, Von Esenwein S, et al. Understanding excess mortality in persons with mental illness: 17-year follow up of a nationally representative US survey. *Med Care*;49(6):599-604.
22. Ryan MC, Collins P, Thakore JH. Impaired fasting glucose tolerance in first-episode, drug-naive patients with schizophrenia. *Am J Psychiatry* 2003;160(2):284-9.
23. Lucae S, Salyakina D, Barden N, et al. P2RX7, a gene coding for a purinergic ligand-gated ion channel, is associated with major depressive disorder. *Hum Mol Genet* 2006;15(16):2438-45.
24. Gidlof O, Smith JG, Melander O, et al. A common missense variant in the ATP receptor P2X7 is associated with reduced risk of cardiovascular events. *PLoS One*;7(5):e37491.
25. Backlund L, Nikamo P, Hukic DS, et al. Cognitive manic symptoms associated with the P2RX7 gene in bipolar disorder. *Bipolar Disord*;13(5-6):500-8.
26. Fiedorowicz JG, Palagummi NM, Forman-Hoffman VL, et al. Miller DD, Haynes WG. Elevated prevalence of obesity, metabolic syndrome, and cardiovascular risk factors in bipolar disorder. *Ann Clin Psychiatry* 2008;20(3):131-7.
27. Birkenaes AB, Opjordsmoen S, Brunborg C, et al. The level of cardiovascular risk factors in bipolar disorder equals that of schizophrenia: a comparative study. *J Clin Psychiatry* 2007;68(6):917-23.
28. Fagiolini A, Frank E, Scott JA, et al. Metabolic syndrome in bipolar disorder: findings from the Bipolar Disorder Center for Pennsylvanians. *Bipolar Disord* 2005;7(5):424-30.

Formatted: English (U.S.)

Formatted: Swedish (Sweden)



29. Johannessen L, Strudsholm U, Foldager L, et al. Increased risk of hypertension in patients with bipolar disorder and patients with anxiety compared to background population and patients with schizophrenia. *J Affect Disord* 2006;95(1-3):13-7.
30. Gotheffors D, Adolfsson R, Attvall S, et al. Swedish clinical guidelines—prevention and management of metabolic risk in patients with severe psychiatric disorders. *Nord J Psychiatry*;64(5):294-302.
31. Laursen TM, Munk-Olsen T, Agerbo E, et al. Somatic hospital contacts, invasive cardiac procedures, and mortality from heart disease in patients with severe mental disorder. *Arch Gen Psychiatry* 2009;66(7):713-20.
32. Manderbacka K, Arffman M, Sund R, et al. How does a history of psychiatric hospital care influence access to coronary care: a cohort study. *BMJ Open*;2(2):e000831.
33. Adler M, Backlund L, Edman G, et al. Symptoms and treatment of bipolar patients in Sweden. *Int J Psychiatry Clin Pract*;16(3):170-7.

Formatted: Swedish (Sweden)

Formatted: English (U.S.)

Our manuscript have been checked towards the STROBE Statement.

STROBE Statement—Checklist of items that should be included in reports of *cohort studies* -

|                              | Item No | Recommendation                                                                                                                                                                                                                                                                                                         |
|------------------------------|---------|------------------------------------------------------------------------------------------------------------------------------------------------------------------------------------------------------------------------------------------------------------------------------------------------------------------------|
| <b>Title and abstract</b>    | 1       | (a) Indicate the study's design with a commonly used term in the title or the abstract<br>(b) Provide in the abstract an informative and balanced summary of what was done and what was found                                                                                                                          |
| <b>Introduction</b>          |         |                                                                                                                                                                                                                                                                                                                        |
| Background/rationale         | 2       | Explain the scientific background and rationale for the investigation being reported                                                                                                                                                                                                                                   |
| Objectives                   | 3       | State specific objectives, including any prespecified hypotheses                                                                                                                                                                                                                                                       |
| <b>Methods</b>               |         |                                                                                                                                                                                                                                                                                                                        |
| Study design                 | 4       | Present key elements of study design early in the paper                                                                                                                                                                                                                                                                |
| Setting                      | 5       | Describe the setting, locations, and relevant dates, including periods of recruitment, exposure, follow-up, and data collection                                                                                                                                                                                        |
| Participants                 | 6       | (a) Give the eligibility criteria, and the sources and methods of selection of participants. Describe methods of follow-up<br>(b) For matched studies, give matching criteria and number of exposed and unexposed                                                                                                      |
| Variables                    | 7       | Clearly define all outcomes, exposures, predictors, potential confounders, and effect modifiers. Give diagnostic criteria, if applicable                                                                                                                                                                               |
| Data sources/<br>measurement | 8*      | For each variable of interest, give sources of data and details of methods of assessment (measurement). Describe comparability of assessment methods if there is more than one group                                                                                                                                   |
| Bias                         | 9       | Describe any efforts to address potential sources of bias                                                                                                                                                                                                                                                              |
| Study size                   | 10      | Explain how the study size was arrived at                                                                                                                                                                                                                                                                              |
| Quantitative variables       | 11      | Explain how quantitative variables were handled in the analyses. If applicable, describe which groupings were chosen and why                                                                                                                                                                                           |
| Statistical methods          | 12      | (a) Describe all statistical methods, including those used to control for confounding<br>(b) Describe any methods used to examine subgroups and interactions<br>(c) Explain how missing data were addressed<br>(d) If applicable, explain how loss to follow-up was addressed<br>(e) Describe any sensitivity analyses |
| <b>Results</b>               |         |                                                                                                                                                                                                                                                                                                                        |
| Participants                 | 13*     | (a) Report numbers of individuals at each stage of study—eg numbers potentially eligible, examined for eligibility, confirmed eligible, included in the study, completing follow-up, and analysed<br>(b) Give reasons for non-participation at each stage<br>(c) Consider use of a flow diagram                        |
| Descriptive data             | 14*     | (a) Give characteristics of study participants (eg demographic, clinical, social) and information on exposures and potential confounders<br>(b) Indicate number of participants with missing data for each variable of interest<br>(c) Summarise follow-up time (eg, average and total amount)                         |
| Outcome data                 | 15*     | Report numbers of outcome events or summary measures over time                                                                                                                                                                                                                                                         |
| Main results                 | 16      | (a) Give unadjusted estimates and, if applicable, confounder-adjusted estimates and their precision (eg, 95% confidence interval). Make clear which confounders were                                                                                                                                                   |

|                          |    |                                                                                                                                                                            |
|--------------------------|----|----------------------------------------------------------------------------------------------------------------------------------------------------------------------------|
|                          |    | adjusted for and why they were included                                                                                                                                    |
|                          |    | (b) Report category boundaries when continuous variables were categorized                                                                                                  |
|                          |    | (c) If relevant, consider translating estimates of relative risk into absolute risk for a meaningful time period                                                           |
| Other analyses           | 17 | Report other analyses done—eg analyses of subgroups and interactions, and sensitivity analyses                                                                             |
| <b>Discussion</b>        |    |                                                                                                                                                                            |
| Key results              | 18 | Summarise key results with reference to study objectives                                                                                                                   |
| Limitations              | 19 | Discuss limitations of the study, taking into account sources of potential bias or imprecision. Discuss both direction and magnitude of any potential bias                 |
| Interpretation           | 20 | Give a cautious overall interpretation of results considering objectives, limitations, multiplicity of analyses, results from similar studies, and other relevant evidence |
| Generalisability         | 21 | Discuss the generalisability (external validity) of the study results                                                                                                      |
| <b>Other information</b> |    |                                                                                                                                                                            |
| Funding                  | 22 | Give the source of funding and the role of the funders for the present study and, if applicable, for the original study on which the present article is based              |

\*Give information separately for exposed and unexposed groups.

**Note:** An Explanation and Elaboration article discusses each checklist item and gives methodological background and published examples of transparent reporting. The STROBE checklist is best used in conjunction with this article (freely available on the Web sites of PLoS Medicine at <http://www.plosmedicine.org/>, Annals of Internal Medicine at <http://www.annals.org/>, and Epidemiology at <http://www.epidem.com/>). Information on the STROBE Initiative is available at <http://www.strobe-statement.org>.



**Cardiovascular mortality in bipolar disorder: A population based cohort study in Sweden**

|                                 |                                                                                                                                                                                                                                                                                                                                                                                                                                                                           |
|---------------------------------|---------------------------------------------------------------------------------------------------------------------------------------------------------------------------------------------------------------------------------------------------------------------------------------------------------------------------------------------------------------------------------------------------------------------------------------------------------------------------|
| Journal:                        | <i>BMJ Open</i>                                                                                                                                                                                                                                                                                                                                                                                                                                                           |
| Manuscript ID:                  | bmjopen-2012-002373.R2                                                                                                                                                                                                                                                                                                                                                                                                                                                    |
| Article Type:                   | Research                                                                                                                                                                                                                                                                                                                                                                                                                                                                  |
| Date Submitted by the Author:   | 22-Feb-2013                                                                                                                                                                                                                                                                                                                                                                                                                                                               |
| Complete List of Authors:       | Westman, Jeanette; Karolinska Institutet, Centre for family medicine (CeFAM)<br>Hällgren, Jonas; Karolinska Institutet, Department of Medical epidemiology and biostatistics (MEB)<br>Wahlbeck, Kristian; THL National Institute for health and welfare, Erlinge, David; Lunds Universitet, Department of Cardiology<br>Alfredsson, Lars; Karolinska institutet, institute of environmental medicine<br>Ösby, Urban; Karolinska Institutet, Center for molecular medicine |
| <b>Primary Subject Heading</b>: | Mental health                                                                                                                                                                                                                                                                                                                                                                                                                                                             |
| Secondary Subject Heading:      | Mental health, Cardiovascular medicine, Public health, Epidemiology, Neurology                                                                                                                                                                                                                                                                                                                                                                                            |
| Keywords:                       | EPIDEMIOLOGY, PSYCHIATRY, CARDIOLOGY, Coronary heart disease < CARDIOLOGY, Myocardial infarction < CARDIOLOGY, Stroke < NEUROLOGY                                                                                                                                                                                                                                                                                                                                         |
|                                 |                                                                                                                                                                                                                                                                                                                                                                                                                                                                           |

SCHOLARONE™  
Manuscripts

Only

1  
2  
3 **Cardiovascular mortality in bipolar disorder: A population based**  
4 **cohort study in Sweden.**  
5  
6  
7

8  
9 Jeanette Westman *Postdoctoral researcher*<sup>1</sup>, Jonas Hällgren *Statistician*<sup>2</sup>, Kristian Wahlbeck  
10 *Professor of psychiatry*<sup>3</sup>, David Erlinge *Professor of cardiology*<sup>4</sup>, Lars Alfredsson *Professor*  
11 *of epidemiology*<sup>5</sup>, Urban Ösby *Senior researcher*<sup>1,6,7,8</sup>  
12  
13

14  
15  
16 <sup>1</sup>Centre for Family Medicine (CeFAM), Department of Neurobiology, Care Sciences, and  
17 Society, Karolinska Institutet, Stockholm, Sweden.

18  
19 <sup>2</sup>Department of Medical Epidemiology and Biostatistics (MEB), Karolinska Institutet,  
20 Stockholm, Sweden.

21  
22 <sup>3</sup>THL, National Institute for Health and Welfare, Helsinki, Finland.

23  
24 <sup>4</sup>Department of Cardiology, Lunds Universitet, Lund, Sweden

25  
26 <sup>5</sup>Institute of Environmental Medicine, Karolinska Institutet, Stockholm, Sweden.

27  
28 <sup>6</sup>Department of Molecular Medicine and Surgery, Neurogenetics, Karolinska Institutet,  
29 Stockholm, Sweden.

30  
31 <sup>7</sup>Center for Molecular Medicine, Karolinska Institutet, Stockholm, Sweden.

32  
33 <sup>8</sup>Department of Psychiatry, Tiohundra AB, Norrtälje, Sweden.  
34

35  
36 Correspondence: Jeanette Westman, PhD  
37 Alfred Nobels Allé 12, SE 141 83 Huddinge, Sweden  
38 Email: jeanette.westman@ki.se  
39 Telephone: +46-(0)8-524 800 00  
40 Fax: +4-(0)8-524 887 06  
41  
42

43  
44 Word count of text: 3131  
45  
46  
47  
48  
49  
50  
51  
52  
53  
54  
55  
56  
57  
58  
59  
60

## Article summary

### Article focus

- To estimate mortality in cardiovascular disease (CVD) and its subgroups cerebrovascular and coronary heart disease and acute myocardial infarction among 17,101 persons diagnosed with bipolar disorder in Sweden, compared to the general population in a national register study with a 20-year follow-up.

### Key messages

- Persons with bipolar disorder died of CVD approximately ten years early. Excess mortality of both CVD (n=824) and other somatic diseases (n=988) was higher than that of suicide and other external causes (n=675 deaths). Mortality rate ratios (MRR) for cerebrovascular disease, coronary heart disease, and acute myocardial infarction, were twice as high compared to the general population. Despite the increased mortality, hospital admissions, admission rate ratios (ARR) for CVD treatment in persons with bipolar disorder were only slightly increased.
- The increased cardiovascular mortality in persons with bipolar disorder calls for renewed efforts to prevent and treat somatic diseases. Specifically, our findings imply that it would be critical to ensure that persons with bipolar disorder receive the same quality care for CVD as the population.

### Strengths and limitations of this study

- A large national cohort with comprehensive data on patient characteristics was studied. Mortality data from the Swedish cause of death register are of high quality.
- Clinical information on symptoms and treatment were lacking.

1  
2  
3 **ABSTRACT** (word count: 265)

4 **Objective:** To estimate cardiovascular mortality among persons with bipolar disorder in  
5 Sweden compared to the general population.

6  
7 **Design:** Population register based cohort study with a 20-year follow-up.

8  
9 **Setting:** Sweden.

10  
11 **Participants:** The entire population of Sweden (n=10.6 million) of whom 17,101 persons  
12 were diagnosed with bipolar disorder between 1987 and 2006.

13  
14 **Main outcome measures:** Mortality rate ratios (MRR), excess mortality (excess deaths),  
15 cardiovascular disorders (CVD) and specifically cerebrovascular disease, coronary heart  
16 disease, acute myocardial infarction, sudden cardiac deaths, and hospital admission rate ratios  
17 (ARR).

18  
19  
20  
21 **Results:** Persons with bipolar disorder died of CVD approximately ten years earlier than the  
22 general population. One third (38%) of all deaths in persons with bipolar disorder were  
23 caused by CVD, and almost half (44%) by other somatic diseases, whereas suicide and other  
24 external causes accounted for less than a fifth of all deaths (18%). Excess mortality of both  
25 CVD (n=824) and other somatic diseases (n=988) was higher than that of suicide and other  
26 external causes (n=675 deaths). MRRs for cerebrovascular disease, coronary heart disease,  
27 and acute myocardial infarction, were twice as high in persons with bipolar disorder  
28 compared to the general population. Despite the increased mortality of CVD, hospital  
29 admissions (ARR) for CVD treatment were only slightly increased in persons with bipolar  
30 disorder when compared to the general population.

31  
32  
33 **Conclusions:** The increased cardiovascular mortality in persons with bipolar disorder calls  
34 for renewed efforts to prevent and treat somatic diseases in this group. Specifically, our  
35 findings further imply that it would be critical to ensure that persons with bipolar disorder  
36 receive the same quality care for CVD as persons without bipolar disorder.  
37  
38  
39  
40  
41  
42  
43  
44  
45  
46  
47  
48  
49  
50  
51  
52  
53  
54  
55  
56  
57  
58  
59  
60

## Introduction

Cardiovascular disease (CVD) is the main cause of death in many developed countries.<sup>1</sup> CVD encompasses a broad range of different conditions that are potentially life threatening. In Sweden, although mortality from CVD in the population has almost halved in the last two decades, CVD still accounts for more than 40% of all deaths in the country.<sup>2</sup> Premature death in patients with severe mental health disorders, especially patients with schizophrenia and bipolar disorder, has historically been attributed to suicide. However, more recent studies have shown that CVD leads to more reduced life spans than does suicide in those patients.<sup>3</sup> Persons with bipolar disorder have an increased risk of CVD and have been observed to die due to CVD twice as often as the general population.<sup>4-6</sup> Although previous studies have shown an association between bipolar disorder and mortality from CVD, few studies have addressed different types of vascular mortality, or examined related use of health care. An improved understanding of the causes behind and magnitude of CVD among bipolar patients is warranted along with an in-depth evaluation of different diagnostic CVD subgroups. The answers to these questions, which are far less investigated in bipolar disorder than in schizophrenia, are essential in the efforts to address the problem of premature deaths due to CVD in persons with bipolar disorder. These questions are the focus of the present national register-based study, which extends earlier Swedish findings<sup>5</sup> both by more specific CVD mortality analyses and more recent patient data.

The aim of this study was to evaluate excess mortality from CVD, such as cerebrovascular disease and coronary heart disease with acute myocardial infarction as its most important component, and also CVD hospitals admissions, in persons with bipolar disorder in Sweden between 1987 and 2006 compared to the population.



## Methods

### Cohort and follow-up

All persons who resided in Sweden between the 1<sup>st</sup> of January 1987 and the 31<sup>st</sup> of December 2006 (n=10,631,208) were identified using the Swedish Total Population Register (TPR). The TPR was established in 1968 and contains information on sex, date and place of birth, and date of migration of every resident in Sweden. Information on hospital admission, medical diagnosis, and cause of death was obtained by linking the TRP with the national Swedish Cause-of-Death Register and the National Patient Register (NPR) using each resident's unique personal identification number.

The NPR, which is maintained by the National Board of Health and Welfare, contains information on all hospital in-patient treatments in Sweden since 1987. For psychiatric in-patient care the register has nationwide coverage dating back from 1973. For each hospitalization, the unique national registration number, date of admission and discharge, and diagnosis are registered in NPR. In Sweden, all hospital diagnoses are classified according to the WHO International Classification of Diseases (ICD). Since the diagnostic definitions of affective disorders were substantially changed in ICD-9 and ICD-10 as compared with ICD-8, only patients diagnosed with bipolar disorder according to ICD-9 or ICD-10 were included in the study. Bipolar diagnoses recorded between 1987 and 1996 were identified using ICD-9 (296A, C, E, 298B). From 1997 and later, ICD-10 (F30-F31) was used to identify bipolar diagnoses. The Swedish Cause of Death Register (CDR) includes all individuals who were registered in Sweden at the time of death. The register provides information on date of death as well as main (underlying) and secondary causes of death based on death certificates. Definitions regarding causes of death and ICD codes used in this study are shown in Figure 1.

A total of 20,248 patients admitted to hospital between 1<sup>st</sup> of January 1987 and 31<sup>st</sup> of December 2006 with a main diagnosis of bipolar disorder (ICD-9; ICD-10) were identified in the NPR. Of the 20,248 patients, 3,147 had been previously diagnosed with schizophrenia (ICD-8: 295; ICD-9: 295; ICD-10; F20, F25) and were consequently excluded. Thus, the total risk population of the study comprised 17,101 patients with bipolar disorder. The follow-up period was 20 years (1987-2006). Immigrants were included from the date of immigration to Sweden. Each person was followed until December 31, 2006, or date of death or emigration,

1  
2  
3 depending on which came first. Inclusion in the risk population started from the date of first  
4 hospital admission (discharge diagnosis) during the study period.  
5  
6

### 7 8 **Statistical analysis**

9  
10 Person years at risk, number of cause-specific deaths and hospital admissions due to CVD for  
11 both bipolar patients and the general population were determined. Person time was stratified  
12 by sex, calendar year and age. Mortality rate ratios (MRR) and Admission rate ratios (ARR)  
13 and predicted mortality rates were calculated with corresponding 95% confidence intervals  
14 (CI) using Poisson regression models with the GENMOD procedure using statistical software  
15 SAS (version 9.2). All models were adjusted for or stratified by sex, attained age and year of  
16 follow-up.  
17  
18  
19  
20  
21

22  
23 To calculate the excess mortality for patients with bipolar disorder the observed number of  
24 deaths was compared with the expected number of deaths among patients with bipolar  
25 disorder. The expected number of deaths was calculated by applying age, sex and calendar  
26 specific mortality rates in the general population to the time at risk among the patients.  
27  
28 The risk of dying from CVD after first hospital admission was analyzed by estimating cause-  
29 specific survival curves using the Kaplan-Meier method. Additional adjusted hazard ratios  
30 with 95% CIs were estimated using Cox proportional hazard models.  
31  
32  
33  
34  
35

36  
37 When hospital admission due to CVD (Admission rate ratios, ARR) was the event of interest,  
38 follow-up ended on the day of first admission. To ensure that the observed cases were  
39 incident, a three-year run-in period was created to compensate for the lack of CVD coverage  
40 in the NPR before 1987. Hence, all bipolar patients analyzed had no hospital admissions due  
41 to CVD recorded for at least three years before follow-up.  
42  
43  
44  
45

## 46 **Results**

### 47 **Causes of death**

48  
49 Total mortality (death from any cause) between 1987 and 2006 in Sweden was more than  
50 twice as high among patients with bipolar disorder compared to the general population (MRR  
51 2.40; 95% CI 2.33-2.47). Specifically, 2,489 excess deaths in patients with bipolar disorder  
52 were observed (Table 1). With mortality causes subdivided into CVD, other somatic, and  
53 external causes of death, we found that men and women with bipolar disorder were twice as  
54  
55  
56  
57  
58  
59  
60

likely to die of CVD compared to the general population (MRR 2.03; 95% CI 1.93-2.13), with 824 excess deaths due to CVD. Mortality from other somatic causes was also doubled (MRR 2.10; 95% CI 2.00-2.19), with 988 excess deaths. External causes of death, such as suicide, homicides, and accidents, were increased more than nine times in bipolar patients (MRR 9.66; 95% CI 8.99-10.37), with 675 excess deaths. As far as CVD subgroups were concerned, mortality from cerebrovascular disease and coronary heart disease was twice as high in bipolar patients, with 184 excess deaths (MRR 2.00; 95% CI 1.81-2.22) and 377 excess deaths (MRR 1.95; 95% CI 1.81-2.09), respectively. Mortality from acute myocardial infarction was almost twice as high in bipolar patients (MRR 1.83; 95% CI 1.67-2.01), with 200 excess deaths. Mortality from sudden cardiac death, cardiac arrest/ventricular fibrillation, was also increased (MRR 1.85; 95% CI 1.42-2.41), with 25 excess deaths. Bipolar women and men of all ages had an equally increased mortality from CVD (data not shown).

### Age and cause of death

MRR by age at death for all causes of death is shown in Fig 2a and subdivided into cardiovascular death (Fig 2b), other somatic death (Fig 2c), suicide and other external causes of death (Fig 2c). Cerebrovascular death (Fig 2e), death by coronary heart disease (Fig 2f), and death from acute myocardial infarction (Fig 2g) are reported separately.

MRR for CVD was increased for bipolar patients across all ages but was particularly pronounced in the young age groups (Figure 2b). Patients with bipolar disorder who died of CVD were younger than people in the general population. The same finding was observed when we subdivided CVD into cerebrovascular disease, coronary heart disease and acute myocardial infarction (Figure 2e-g). For acute myocardial infarction and coronary heart disease the increased risk was most apparent in the 55-65 years age groups (2f-g). In the ages below 50 years the results should be interpreted with caution because there were very few events in these ages. Death by suicide and other external causes of death were 15 times more common among bipolar patients below 30 years of age compared to persons of the same age in the general population (Figure 2d). Overall, the MRR for suicide and other external causes of death decreased with increasing age. However, it should be noted that it remained significantly increased in persons aged between 70-74 years (MRR 6.88; CI 95% 5.06-9.35) (Figure 2d).

1  
2  
3 Age differences at death between persons with bipolar disorder and the population from  
4 coronary heart disease, acute myocardial infarction and cerebrovascular disease is shown in  
5 Figure 3a-3c. The earlier age at death for persons with bipolar disorder is clearly shown for all  
6 these causes of death.  
7  
8  
9

### 10 11 **Admission rates**

12 Hospital admission rates for CVD among patients with bipolar disorder were similar to those  
13 for the general population even though MRR for CVD was almost twice as high, independent  
14 of the specific CVD cause (Tables 1 and 2). Survival rates five years after first hospital  
15 admission for CVD were significantly lower among bipolar patients than among the general  
16 population (Figure 4).  
17  
18  
19  
20  
21

## 22 23 **Discussion**

### 24 25 **Key findings**

26 In this nationwide study of mortality among persons with bipolar disorder in Sweden  
27 compared to the population, somatic illness was the main cause of death. Bipolar patients died  
28 of CVD around ten years earlier than the general population. Mortality from cerebrovascular  
29 disease, coronary heart disease, and acute myocardial infarction was twice as high in bipolar  
30 patients as in the general population, while the frequency of hospital admissions due to these  
31 diseases was not increased. Our findings showed that CVD in persons with bipolar disorder  
32 accounted for 824 excess deaths and other somatic diseases 988 excess deaths, taken together  
33 1,812 excess deaths, both larger than suicide and other external causes of death (n=675).  
34 Interestingly, sudden cardiac death was also increased.  
35  
36  
37  
38  
39  
40  
41  
42

### 43 44 **Strengths and limitations**

45 The Swedish National Patient Register and Cause of Death Register include everyone who  
46 resides in the country and are considered unique, comprehensive and highly credible.  
47 Currently more than 99% of all somatic and psychiatric hospital discharges are recorded in  
48 the National Patient Register.<sup>7</sup> Swedish hospitals and government agencies are obliged by law  
49 to enter medical information in the National Patient Register. All diagnoses in the National  
50 Patient and Cause of Death registers were given by patients' doctors using international  
51 classification standards (ICD codes). Being register based, this study used information about  
52 clinical diagnoses from hospital admissions in Sweden. During the study period, the ICD  
53  
54  
55  
56  
57  
58  
59  
60

1  
2  
3 diagnostic definitions were specific for bipolar disorder. A validation of the Swedish clinical  
4 bipolar hospital diagnoses has shown high validity, sufficient for epidemiological studies.<sup>8</sup>  
5 One limitation of this study was that it was based on in-patient diagnoses, which may have  
6 generated a selective bias towards severely ill patients. However, most individuals at severe  
7 stages of bipolar disorder are admitted to hospital in Sweden. Since medical care is free in  
8 Sweden, there is no bias by costs for hospital care leading to differences in health-seeking  
9 behavior. In a previous study, we have shown that the number and frequency of hospital  
10 admissions due to bipolar disorder remained relatively unchanged during recent years, while  
11 the overall number of psychiatric admissions was drastically reduced.<sup>9</sup> We did not have  
12 access to medical records or information on medical treatment. In terms of the validity of the  
13 data on causes of death, in CVD deaths we found a slightly higher autopsy rate (28%) among  
14 patients with bipolar disorder than in the general population (22%). It is unlikely that these  
15 small differences affected the outcome of the study. An advantage with the present study is  
16 the analysis of specific causes of death.

### 27 28 **Findings from other studies**

29 The findings of this study add to the growing body of evidence that somatic diseases,  
30 particularly CVD, contribute to a shorter lifespan among bipolar patients. Findings from  
31 several large register-based studies from different parts of the world indicate that  
32 cardiovascular disease is responsible for the majority of excess deaths, with up to 2.5-fold  
33 increased mortality.<sup>3 5 6 10-14</sup> Studies using registers from the Nordic countries have shown that  
34 bipolar patients run almost twice the risk of dying from CVD than do persons in the general  
35 population, the mechanisms for which are currently unknown.<sup>4 5</sup> There is a growing body of  
36 evidence from studies in other countries, and findings similar to ours have been observed in a  
37 representative study of the US population.<sup>15</sup> In our previous study,<sup>5</sup> SMR for CVD but not for  
38 cerebrovascular mortality was higher for women compared to men. This difference was not  
39 found in our present study. SMR and MRR are relative measurements, affected both by  
40 population trends and trends among the cases. Thus, the different findings could be related  
41 both to changing mortality rates in the population and to changes among persons with bipolar  
42 disorder, or a combination of those factors. CVD contains several different causes of  
43 mortality, which may have different trends over time. However, the specific causes of death  
44 related to the sex difference in CHD mortality previously found cannot be answered in our  
45 study.

1  
2  
3 Studies have shown a higher cardiovascular mortality in persons with bipolar disorder type I  
4 compared to bipolar disorder type II or major depressive disorder.<sup>16 17</sup> In our Swedish data,  
5 bipolar disorder type I cannot be separated from bipolar disorder type II. However, patients  
6 with bipolar disorder type I are much more likely to be hospitalized and thus to be included in  
7 our sample. Earlier age of CVD has been shown in several studies,<sup>15</sup> and is also confirmed in  
8 our findings of increased cardiovascular death at a younger age compared to the population in  
9 Sweden. Possible risk factors for the increased mortality from CVD among bipolar patients  
10 may include adverse effects of medication,<sup>18 19</sup> high levels of smoking,<sup>20</sup> unhealthy diet,<sup>21 22</sup>  
11 lack of physical activity,<sup>21</sup> low social-economic status,<sup>23</sup> and lower rates of nutritional  
12 counseling.<sup>24</sup> Studies have shown that bipolar disorder patients deviate from age-based norms  
13 on arterial stiffness measures.<sup>25</sup> Also, inflammation has been pointed out as a potential  
14 biological cause of increased CVD in bipolar disorder<sup>30 31</sup> together with endothelial  
15 dysfunction.<sup>32</sup> In addition, effects of genetic associations, such as those reported between  
16 Type 2 diabetes, CHD and schizophrenia,<sup>26</sup> could not be excluded. One of the most important  
17 locuses of genetic polymorphisms linked to bipolar disease and depression is around the ATP-  
18 activated ion-channel receptor *P2X7*.<sup>27</sup> Recently, a polymorphism in the *P2X7* gene was  
19 linked to increased risk of stroke and acute myocardial infarction,<sup>28</sup> and the same  
20 polymorphism has also recently been shown to be linked to cognitive symptoms in bipolar  
21 disorder,<sup>29</sup> indicating that common genetic factors could have effect on both cardiovascular  
22 disease and bipolar disorder.  
23  
24  
25  
26  
27  
28  
29  
30  
31  
32  
33  
34  
35  
36  
37

### 38 **CVD undertreated in persons with bipolar disorder**

39 Studies of patients with bipolar disorder have shown that the patients have an increased risk  
40 of metabolic syndrome,<sup>33</sup> i.e. increased blood glucose,<sup>34</sup> and cholesterol levels,<sup>35</sup> higher blood  
41 pressure,<sup>36</sup> and higher prevalence of overweight and obesity,<sup>21</sup> closely associated with CVD.  
42 To prevent and treat metabolic disorders in patients with severe mental illnesses such as  
43 bipolar disorder, new guidelines for clinicians in Sweden were drawn up in 2009, thus after  
44 the end of this study, by psychiatrists, diabetologists, endocrinologists, cardiologists and  
45 general practitioners in collaboration.<sup>37</sup> The guidelines can be found on the website of the  
46 Swedish Psychiatric Association ([www.svenskpsykiatri.se](http://www.svenskpsykiatri.se)). In the guidelines, there is a strong  
47 emphasis on the increased metabolic risks at younger age, with focus both on primary and  
48 secondary prevention strategies and the need for collaboration between the different medical  
49 specialties. The effects of those guidelines are still to be evaluated.  
50  
51  
52  
53  
54  
55  
56  
57  
58  
59  
60

1  
2  
3 Our finding that patients with bipolar disorder showed only slightly increased hospital  
4 admissions rates for CVD despite their twice as high cardiovascular mortality, strongly  
5 suggests that CVD is undertreated in bipolar patients when compared to the general  
6 population. In a Danish study, the rates of invasive heart disease procedures were 40% lower  
7 among persons with bipolar disorder than in the general population.<sup>4</sup> Although the younger  
8 age at cardiac events in bipolar disorder compared to the population may reduce detection,  
9 this factor is unlikely to cause the reduced rates of invasive heart procedures, since younger  
10 age at detection would rather be expected to lead to more intensive treatment. The lower rate  
11 of invasive heart disease procedures among persons with bipolar disorder is yet to be  
12 explained. Sudden cardiac mortality from cardiac arrest/ventricular fibrillation was increased  
13 among patients with bipolar disorder (MRR: 1.85), but the 25 excess cases does not explain  
14 the difference in CVD admissions in terms of increased sudden death before hospital  
15 admission. Thus, the reasons for CVD undertreatment in bipolar disorder is not explained by  
16 the current findings. In our study, the MRR and ARR patient populations are slightly  
17 different, in the respect that the ARR patients are identified at their first index admission,  
18 while the MRR patients may have several admissions, and thus being more severely affected.  
19 Unequal access to health care (i.e. receiving cardiac treatment of lower quality) for reasons  
20 other than financial has been previously suggested as a contributor to excess CVD mortality  
21 in patients with severe mental disorders, such as schizophrenia,<sup>38</sup> and may be indicated by our  
22 findings of increased mortality after discharge from hospital compared to the population.  
23 These factors have not been studied extensively in bipolar patients. Health care in Sweden is  
24 free and is financed primarily through taxes. Therefore, it is unlikely that patients with bipolar  
25 disorder do not seek hospital care for lack of financial means.

26  
27  
28  
29  
30  
31  
32  
33  
34  
35  
36  
37  
38  
39  
40  
41  
42  
43 Many mechanisms can contribute to the under-treatment of CVD among people with bipolar  
44 disorder. Our results indicate a failure of the health care system to identify and address the  
45 health needs of those patients, which has also been shown in other studies of people with  
46 severe mental disorders.<sup>39</sup> The levels of CVD mortality in our bipolar persons are similar to  
47 those in schizophrenia, where adverse effects of antipsychotic medication have been  
48 considered the main contributing factor. When compared with schizophrenia, a recent study  
49 of bipolar disorder in Stockholm County found only 29% of bipolar patients medicating with  
50 antipsychotics, as compared to practically all schizophrenia patients, which raises the question  
51 of the importance of adverse effects of antipsychotics in CVD.<sup>40</sup>  
52  
53  
54  
55  
56  
57  
58  
59  
60

### Conclusions

The observed number of deaths from cardiovascular diseases in patients with bipolar disorders was almost twice as the expected number when comparing with the general population, suggesting that more resources are needed for the prevention of these diseases in this patient group. Targeted interventions by effective cooperation between primary health care and psychiatric professionals would be crucial in the efforts to reduce excess CVD mortality in patients with bipolar disorder. Finally, effective cardiac treatment would ensure longevity and improved quality of life for patients with bipolar disorder.

For peer review only



1  
2  
3 **Contributors:** UÖ had the idea of the study and is guarantor of the study together with JH,  
4 who has performed the statistical analyses. JW has contributed to the design of the study and  
5 drafted the manuscript together with UÖ. KW, DE and LA have contributed to the design of  
6 the study and with revisions of the manuscript. All authors have approved the final version of  
7 the study.  
8  
9  
10

11 **Funding:** This paper was supported by Swedish Council for Working Life and Social  
12 Research (grant number FAS 2008-0885) and Stockholm County Council (Grant number PPG  
13 -20120263). The study was conducted and analyzed independently from its funders.  
14  
15

16 **Competing interests:** All authors have completed the ICMJE uniform disclosure form  
17 (available on request from the corresponding author). JW, KW, LA, DE, UÖ has declared no  
18 support from any organization for the submitted work, no financial relationship with any  
19 organizations that would have interest in the submitted work in the previous three years, and  
20 no other activities that could appear to have influenced the submitted work. UÖ has declared  
21 traveling expenses from Janssen-Cilag for attending a course in October 2012 unrelated to the  
22 study.  
23  
24  
25  
26  
27

28 **Ethical approval:** This study was approved by the ethical review board in Stockholm  
29 County. The ethical review board determined that informed consent from participating  
30 individuals was not required.  
31  
32

33 **Data sharing:** The analysis data set for this study is available from the National Board of  
34 Health and Welfare (Socialstyrelsen) in Sweden. Please contact JH for further information.  
35

36 **Licence for publication:** The Corresponding Author has the right to grant on behalf of all  
37 authors and does grant on behalf of all authors, an exclusive licence on a worldwide basis to  
38 the BMJ Publishing Group Ltd and its Licensees to permit this article (if accepted) to be  
39 published in BMJ editions and any other BMJ PGL products and sublicences to exploit all  
40 subsidiary rights, as set out in our licence ( [http://resources.bmj.com/bmj/authors/checklists-](http://resources.bmj.com/bmj/authors/checklists-forms/licence-for-publication)  
41 [forms/licence-for-publication](http://resources.bmj.com/bmj/authors/checklists-forms/licence-for-publication)).  
42  
43  
44  
45  
46  
47  
48  
49  
50  
51  
52  
53  
54  
55  
56  
57  
58  
59  
60

Figure 1. ICD-coding and classification of disease and mortality.



Table 1. Mortality rate ratios (MRR) for persons with bipolar disorder between 1987 and 2006

| Cause of death                          | Men   |                   | Women |                    | Total (both sexes) |                   |                       |
|-----------------------------------------|-------|-------------------|-------|--------------------|--------------------|-------------------|-----------------------|
|                                         | Cases | MRR ( 95% CI)     | Cases | MRR ( 95% CI)      | Cases              | MRR ( 95% CI)     | Excess cases (95% CI) |
| All causes of death                     | 1874  | 2.48 (2.37-2.59)  | 2393  | 2.34 (2.25-2.44)   | 4267               | 2.40 (2.33-2.47)  | 2489 (2361-2617)      |
| Cardiovascular disease                  | 733   | 2.16 (2.01-2.33)  | 892   | 1.93 (1.81-2.06)   | 1625               | 2.03 (1.93-2.13)  | 824 (745-903)         |
| Other somatic deaths                    | 735   | 1.97 (1.83-2.11)  | 1154  | 2.19 (2.06-2.32)   | 1889               | 2.10 (2.00-2.19)  | 988 (902-1073)        |
| Suicide and other External deaths       | 406   | 9.37 (8.50-10.33) | 347   | 10.02 (9.01-11.13) | 753                | 9.66 (8.99-10.37) | 675 (621-729)         |
| Cerebrovascular disease                 | 144   | 2.29 (1.94-2.70)  | 224   | 1.86 (1.63-2.12)   | 368                | 2.00 (1.81-2.22)  | 184 (147-222)         |
| Coronary heart disease                  | 385   | 2.00 (1.81-2.21)  | 391   | 1.89 (1.71-2.09)   | 776                | 1.95 (1.81-2.09)  | 377 (323-432)         |
| Acute myocardial infarction             | 227   | 1.89 (1.66-2.15)  | 213   | 1.78 (1.55-2.03)   | 440                | 1.83 (1.67-2.01)  | 200 (159-241)         |
| Cardiac arrest/Ventricular fibrillation | 23    | 2.29 (1.52-3.45)  | 32    | 1.62 (1.15-2.30)   | 55                 | 1.85 (1.42-2.41)  | 25 (12-42)            |

**Table 2. Admission rate ratios (ARR) for persons with bipolar disorder during 1990 to 2006**

| Hospital admissions         | Men   |                  | Women |                  | Total (both sexes) |                  |                       |
|-----------------------------|-------|------------------|-------|------------------|--------------------|------------------|-----------------------|
|                             | Cases | ARR (95% CI)     | Cases | ARR (95% CI)     | Cases              | ARR (95% CI)     | Excess cases (95% CI) |
| Cardiovascular disease      | 540   | 1.27 (1.16-1.38) | 696   | 1.33 (1.24-1.43) | 1236               | 1.30 (1.23-1.38) | 287 (218-356)         |
| Cerebrovascular disease     | 179   | 1.32 (1.14-1.53) | 271   | 1.43 (1.27-1.62) | 450                | 1.39 (1.26-1.52) | 125 (84-167)          |
| Coronary heart disease      | 212   | 1.02 (0.89-1.17) | 207   | 1.06 (0.92-1.21) | 419                | 1.04 (0.94-1.14) | 15 (-25-55)           |
| Acute myocardial infarction | 133   | 0.96 (0.81-1.14) | 137   | 1.11 (0.94-1.31) | 270                | 1.03 (0.92-1.16) | 8 (-24-41)            |

Figure 2a. Mortality rate ratios (MRR) for all causes of death by age at death in persons with bipolar disorder and the general population.



For peer review only

Figure 2b. Mortality rate ratios (MRR) for cardiovascular death by age at death in persons with bipolar disorder and the general population.

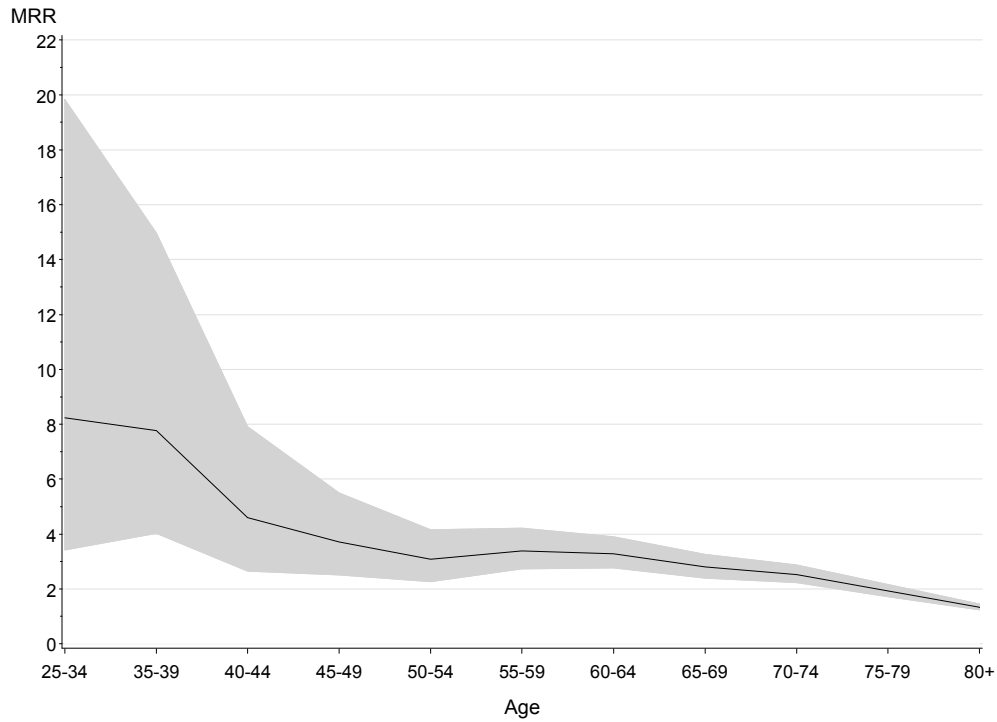

For peer review only

1  
2  
3  
4  
5  
6  
7  
8  
9  
10  
11  
12  
13  
14  
15  
16  
17  
18  
19  
20  
21  
22  
23  
24  
25  
26  
27  
28  
29  
30  
31  
32  
33  
34  
35  
36  
37  
38  
39  
40  
41  
42  
43  
44  
45  
46  
47  
48  
49

Figure 2c. Mortality rate ratios (MRR) for other somatic death by age at death in patients with bipolar disorder and the general population.

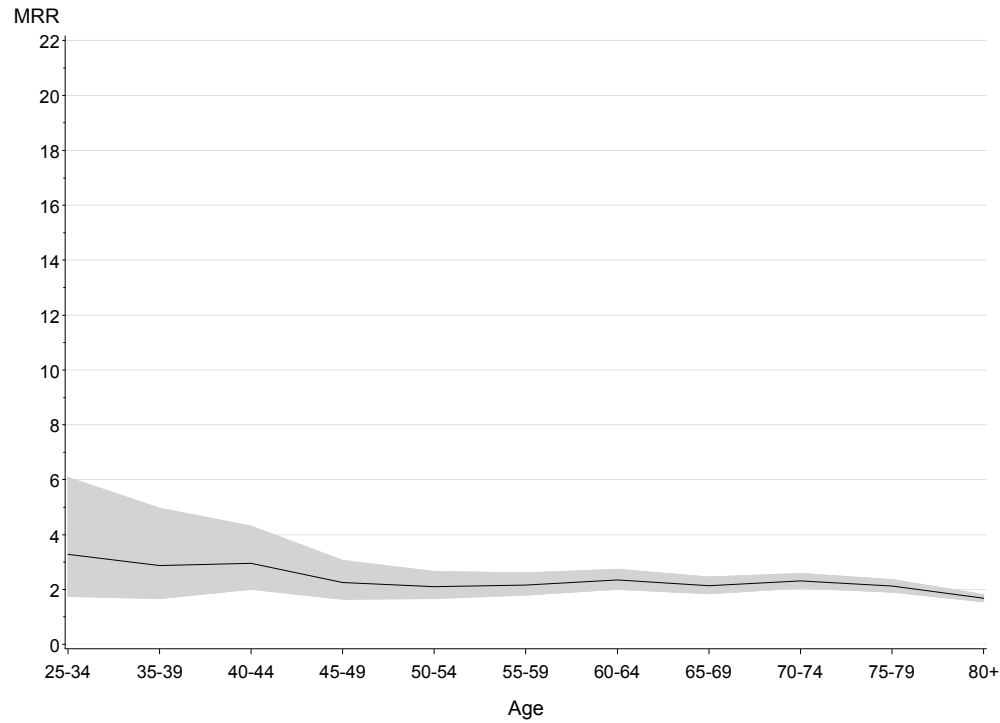

For peer review only

Figure 2d. Mortality rate ratios (MRR) of suicide and other external causes of death by age at death in patients with bipolar disorder and the general population.





Figure 2e. Mortality rate ratios (MRR) of cerebrovascular disease by age at death in persons with bipolar disorder and the general population.

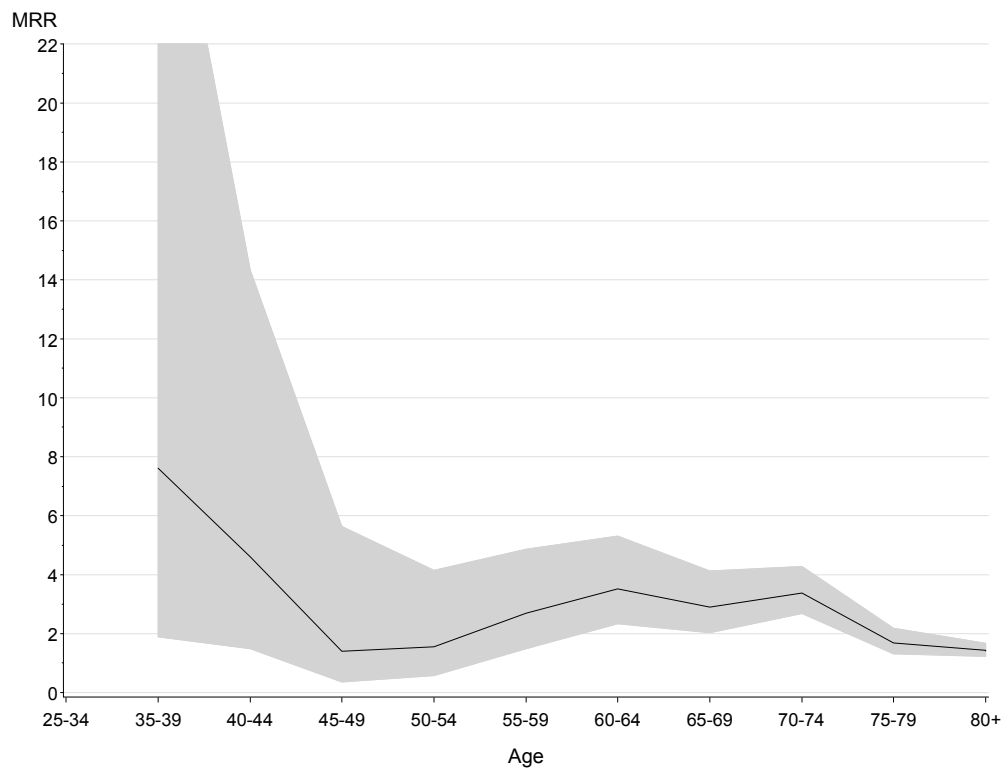

For peer review only

Figure 2f. Mortality rate ratios (MRR) of coronary heart disease by age at death in persons with bipolar disorder and the general population.

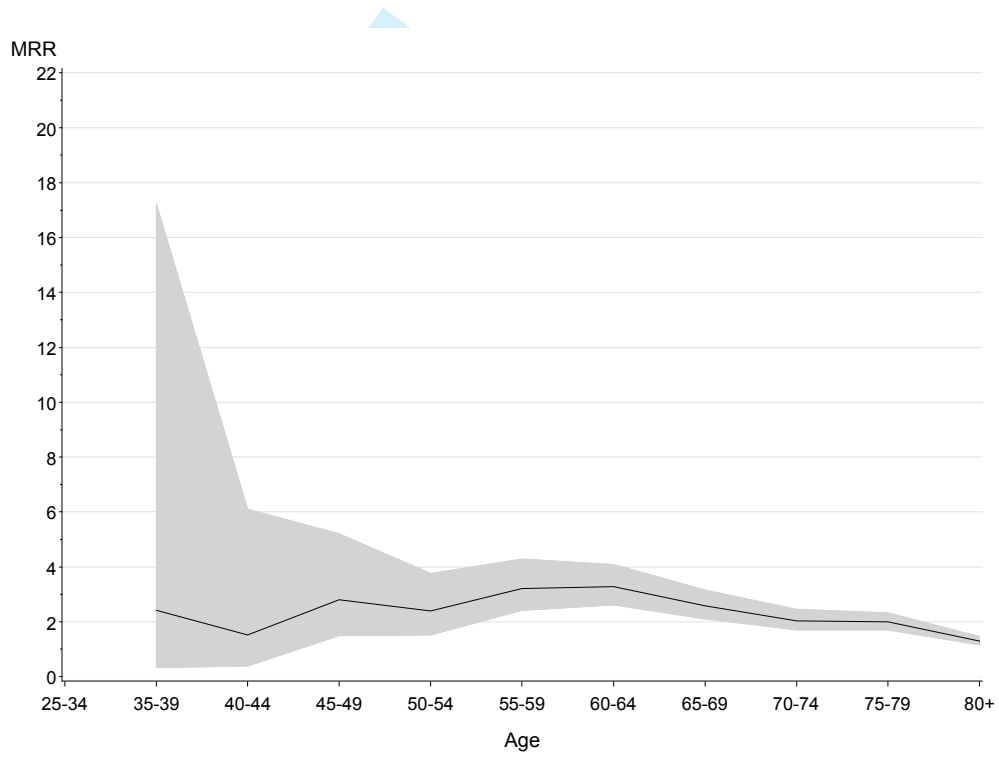

For peer review only

Figure 2g. Mortality rate ratios (MRR) of acute myocardial infarction by age at death in persons with bipolar disorder and the general population.

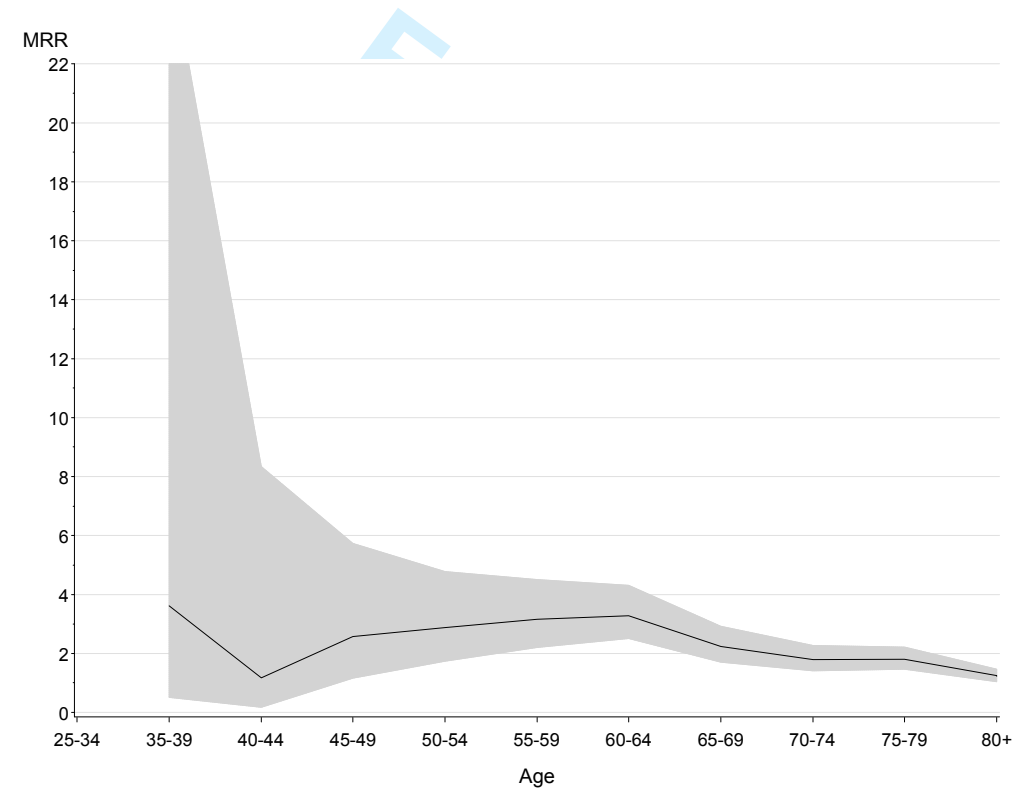

For peer review only

Figure 3a. Mortality of coronary heart disease per 1,000 person-years in persons with bipolar disorder and the general population adjusting for sex and calendar year.



Figure 3b. Mortality of acute myocardial infarction per 1,000 person-years in persons with bipolar disorder and the general population adjusting for sex and calendar year.

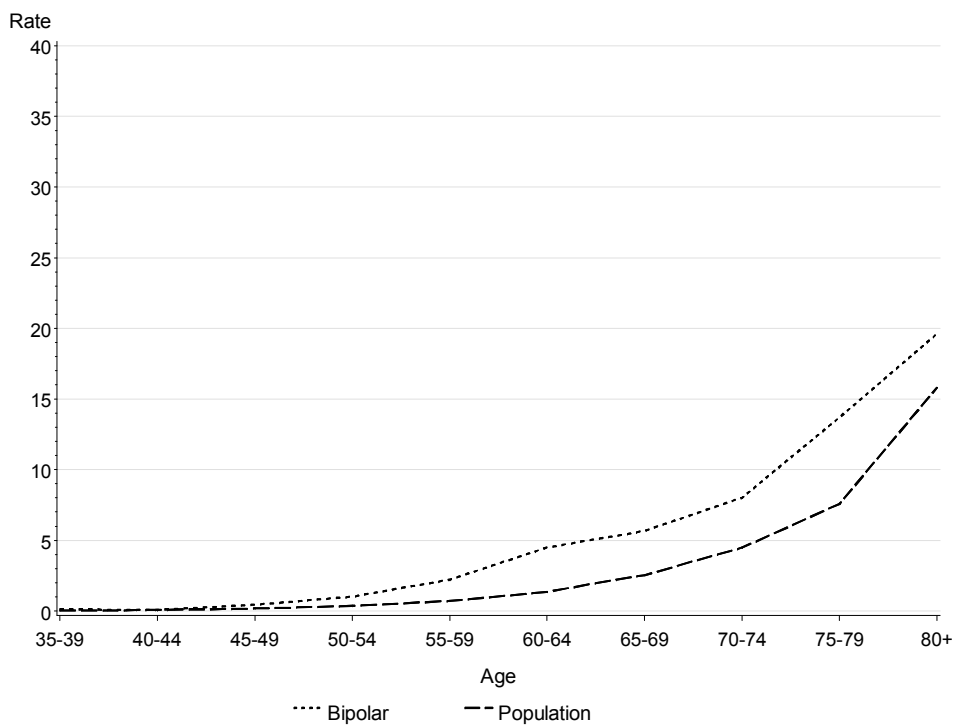

For peer review only

Figure 3c. Mortality of cerebrovascular disease per 1,000 person-years in persons with bipolar disorder and the general population adjusting for sex and calendar year.

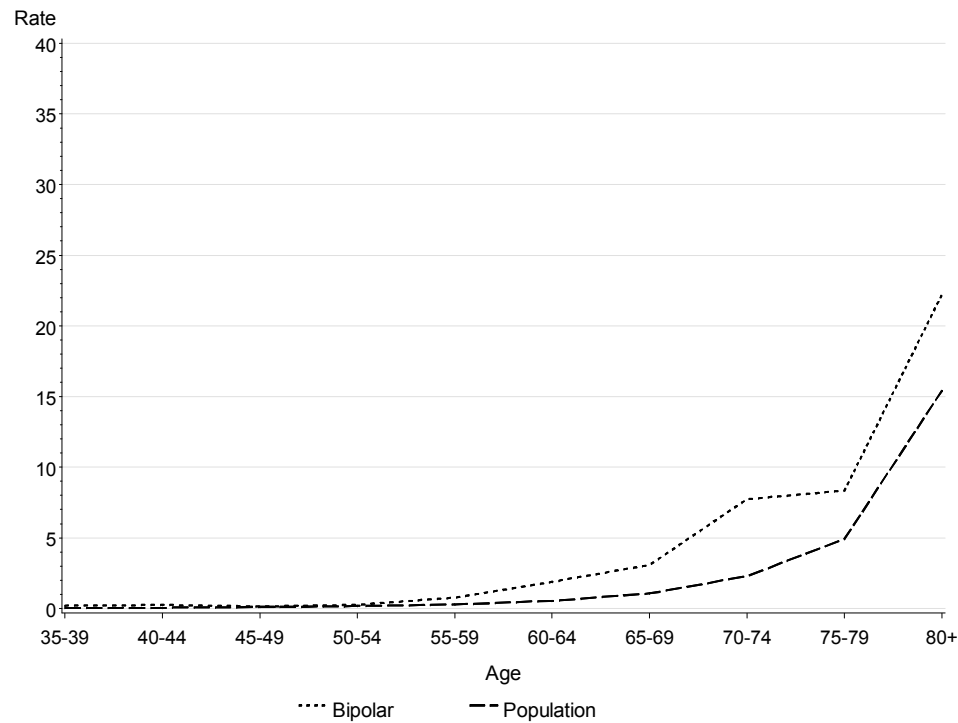

Figure 4. Five-year survival of cardiovascular disease in persons with bipolar disorder after discharge from first cardiovascular admission stratified by age at hospital contact.

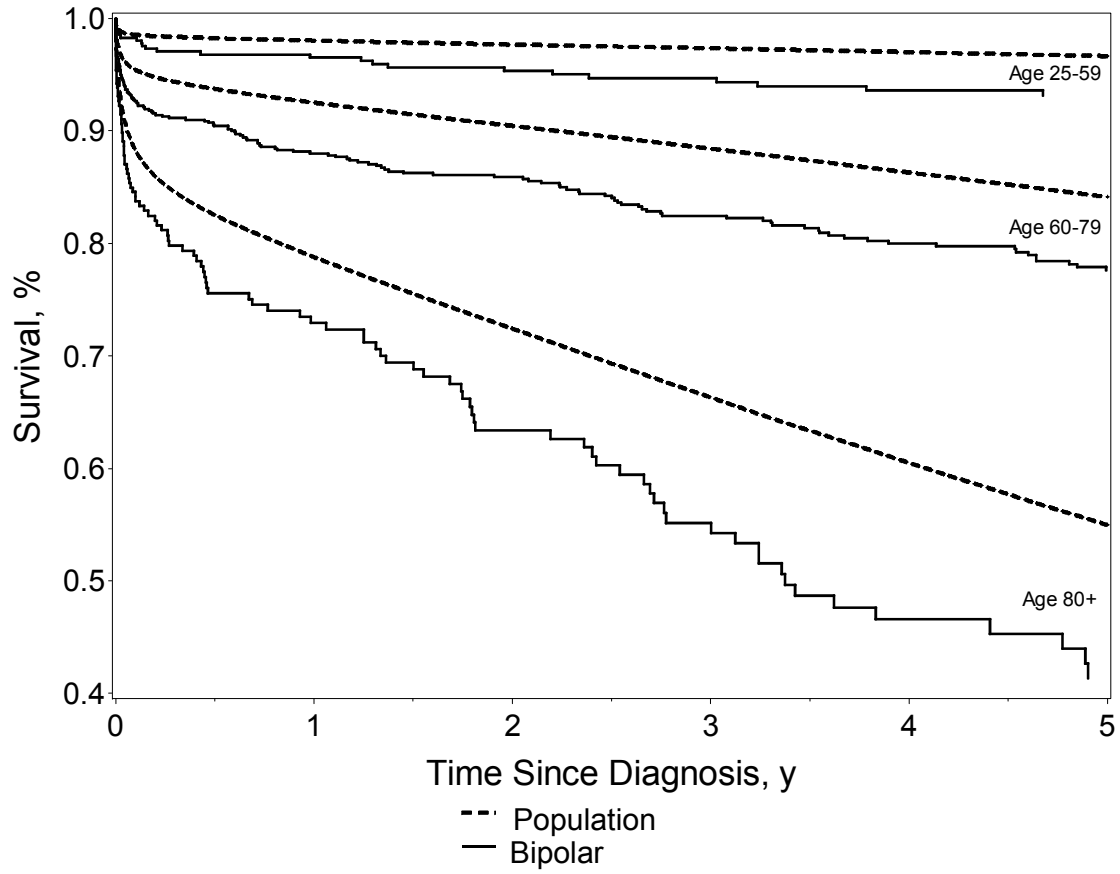

only

## References

1. World Health Organisation. Global atlas on cardiovascular disease prevention and control. Policies, strategies and interventions. WHO, 2011.
2. Socialstyrelsen. Folkhälsorapport 2009 (The National Public Health Report 2009) Stockholm: The National Board of Health and Welfare in Sweden, 2009.
3. Laursen TM. Life expectancy among persons with schizophrenia or bipolar affective disorder. *Schizophr Res*;131(1-3):101-4.
4. Laursen TM, Nordentoft M. Heart disease treatment and mortality in schizophrenia and bipolar disorder - changes in the Danish population between 1994 and 2006. *J Psychiatr Res*;45(1):29-35.
5. Osby U, Brandt L, Correia N, Ekbom A, Sparen P. Excess mortality in bipolar and unipolar disorder in Sweden. *Arch Gen Psychiatry* 2001;58(9):844-50.
6. Laursen TM, Munk-Olsen T, Nordentoft M, Mortensen PB. Increased mortality among patients admitted with major psychiatric disorders: a register-based study comparing mortality in unipolar depressive disorder, bipolar affective disorder, schizoaffective disorder, and schizophrenia. *J Clin Psychiatry* 2007;68(6):899-907.
7. Ludvigsson JF, Andersson E, Ekbom A, Feychting M, Kim JL, Reuterwall C, et al. External review and validation of the Swedish national inpatient register. *BMC Public Health*;11:450.
8. Sellgren C, Landen M, Lichtenstein P, Hultman CM, Langstrom N. Validity of bipolar disorder hospital discharge diagnoses: file review and multiple register linkage in Sweden. *Acta Psychiatr Scand*;124(6):447-53.
9. Osby U, Tiainen A, Backlund L, Edman G, Adler M, Hallgren J, et al. Psychiatric admissions and hospitalization costs in bipolar disorder in Sweden. *J Affect Disord* 2009;115(3):315-22.
10. McIntyre RS, Danilewitz M, Liauw SS, Kemp DE, Nguyen HT, Kahn LS, et al. Bipolar disorder and metabolic syndrome: an international perspective. *J Affect Disord*;126(3):366-87.
11. Zilber N, Schufman N, Lerner Y. Mortality among psychiatric patients--the groups at risk. *Acta Psychiatr Scand* 1989;79(3):248-56.
12. Lawrence DM, Holman CD, Jablensky AV, Hobbs MS. Death rate from ischaemic heart disease in Western Australian psychiatric patients 1980-1998. *Br J Psychiatry* 2003;182:31-6.
13. Kisely S, Smith M, Lawrence D, Maaten S. Mortality in individuals who have had psychiatric treatment: population-based study in Nova Scotia. *Br J Psychiatry* 2005;187:552-8.
14. Roshanaei-Moghaddam B, Katon W. Premature mortality from general medical illnesses among persons with bipolar disorder: a review. *Psychiatr Serv* 2009;60(2):147-56.
15. Goldstein BI, Fagiolini A, Houck P, Kupfer DJ. Cardiovascular disease and hypertension among adults with bipolar I disorder in the United States. *Bipolar Disord* 2009;11(6):657-62.
16. Angst J, Hengartner MP, Gamma A, von Zerssen D, Angst F. Mortality of 403 patients with mood disorders 48 to 52 years after their psychiatric hospitalisation. *Eur Arch Psychiatry Clin Neurosci*.
17. Fiedorowicz JG, Solomon DA, Endicott J, Leon AC, Li C, Rice JP, et al. Manic/hypomanic symptom burden and cardiovascular mortality in bipolar disorder. *Psychosom Med* 2009;71(6):598-606.



18. Sachs G, Bowden C, Calabrese JR, Ketter T, Thompson T, White R, et al. Effects of lamotrigine and lithium on body weight during maintenance treatment of bipolar I disorder. *Bipolar Disord* 2006;8(2):175-81.
19. Newcomer JW. Medical risk in patients with bipolar disorder and schizophrenia. *J Clin Psychiatry* 2006;67(11):e16.
20. Lasser K, Boyd JW, Woolhandler S, Himmelstein DU, McCormick D, Bor DH. Smoking and mental illness: A population-based prevalence study. *JAMA* 2000;284(20):2606-10.
21. McElroy SL, Frye MA, Suppes T, Dhavale D, Keck PE, Jr., Leverich GS, et al. Correlates of overweight and obesity in 644 patients with bipolar disorder. *J Clin Psychiatry* 2002;63(3):207-13.
22. Kruger S, Shugar G, Cooke RG. Comorbidity of binge eating disorder and the partial binge eating syndrome with bipolar disorder. *Int J Eat Disord* 1996;19(1):45-52.
23. Druss BG, Zhao L, Von Esenwein S, Morrato EH, Marcus SC. Understanding excess mortality in persons with mental illness: 17-year follow up of a nationally representative US survey. *Med Care*;49(6):599-604.
24. Goodrich DE, Lai Z, Lasky E, Burghardt AR, Kilbourne AM. Access to weight loss counseling services among patients with bipolar disorder. *J Affect Disord*;126(1-2):75-9.
25. Sodhi SK, Linder J, Chenard CA, Miller del D, Haynes WG, Fiedorowicz JG. Evidence for accelerated vascular aging in bipolar disorder. *J Psychosom Res*;73(3):175-9.
26. Ryan MC, Collins P, Thakore JH. Impaired fasting glucose tolerance in first-episode, drug-naive patients with schizophrenia. *Am J Psychiatry* 2003;160(2):284-9.
27. Lucae S, Salyakina D, Barden N, Harvey M, Gagne B, Labbe M, et al. P2RX7, a gene coding for a purinergic ligand-gated ion channel, is associated with major depressive disorder. *Hum Mol Genet* 2006;15(16):2438-45.
28. Gidlof O, Smith JG, Melander O, Lovkvist H, Hedblad B, Engstrom G, et al. A common missense variant in the ATP receptor P2X7 is associated with reduced risk of cardiovascular events. *PLoS One*;7(5):e37491.
29. Backlund L, Nikamo P, Hukic DS, Ek IR, Traskman-Bendz L, Landen M, et al. Cognitive manic symptoms associated with the P2RX7 gene in bipolar disorder. *Bipolar Disord*;13(5-6):500-8.
30. Goldstein BI, Kemp DE, Soczynska JK, McIntyre RS. Inflammation and the phenomenology, pathophysiology, comorbidity, and treatment of bipolar disorder: a systematic review of the literature. *J Clin Psychiatry* 2009;70(8):1078-90.
31. Leboyer M, Soreca I, Scott J, Frye M, Henry C, Tamouza R, et al. Can bipolar disorder be viewed as a multi-system inflammatory disease? *J Affect Disord*;141(1):1-10.
32. Rybakowski JK, Wykretowicz A, Heymann-Szlachcinska A, Wysocki H. Impairment of endothelial function in unipolar and bipolar depression. *Biol Psychiatry* 2006;60(8):889-91.
33. Fiedorowicz JG, Palagummi NM, Forman-Hoffman VL, Miller DD, Haynes WG. Elevated prevalence of obesity, metabolic syndrome, and cardiovascular risk factors in bipolar disorder. *Ann Clin Psychiatry* 2008;20(3):131-7.
34. Birkenaes AB, Opjordsmoen S, Brunborg C, Engh JA, Jonsdottir H, Ringen PA, et al. The level of cardiovascular risk factors in bipolar disorder equals that of schizophrenia: a comparative study. *J Clin Psychiatry* 2007;68(6):917-23.

- 1  
2  
3  
4  
5 35. Fagiolini A, Frank E, Scott JA, Turkin S, Kupfer DJ. Metabolic syndrome in bipolar disorder: findings from the Bipolar Disorder Center for Pennsylvanians.  
6 *Bipolar Disord* 2005;7(5):424-30.  
7  
8 36. Johannessen L, Strudsholm U, Foldager L, Munk-Jorgensen P. Increased risk of hypertension in patients with bipolar disorder and patients with anxiety  
9 compared to background population and patients with schizophrenia. *J Affect Disord* 2006;95(1-3):13-7.  
10  
11 37. Gothefors D, Adolfsson R, Attvall S, Erlinge D, Jarbin H, Lindstrom K, et al. Swedish clinical guidelines--prevention and management of metabolic risk in  
12 patients with severe psychiatric disorders. *Nord J Psychiatry*;64(5):294-302.  
13  
14 38. Laursen TM, Munk-Olsen T, Agerbo E, Gasse C, Mortensen PB. Somatic hospital contacts, invasive cardiac procedures, and mortality from heart disease  
15 in patients with severe mental disorder. *Arch Gen Psychiatry* 2009;66(7):713-20.  
16  
17 39. Manderbacka K, Arffman M, Sund R, Haukka J, Keskimaki I, Wahlbeck K. How does a history of psychiatric hospital care influence access to coronary care:  
18 a cohort study. *BMJ Open*;2(2):e000831.  
19  
20 40. Adler M, Backlund L, Edman G, Osby U. Symptoms and treatment of bipolar patients in Sweden. *Int J Psychiatry Clin Pract*;16(3):170-7.  
21  
22  
23  
24  
25  
26  
27  
28  
29  
30  
31  
32  
33  
34  
35  
36  
37  
38  
39  
40  
41  
42  
43  
44  
45  
46  
47  
48  
49

## Cardiovascular mortality in bipolar disorder: A population based cohort study in Sweden.

Jeanette Westman *Postdoctoral researcher*<sup>1</sup>, Jonas Hällgren *Statistician*<sup>2</sup>, Kristian Wahlbeck *Professor of psychiatry*<sup>3</sup>, David Erlinge *Professor of -cardiology*<sup>4</sup>, Lars Alfredsson *Professor of epidemiology*<sup>5</sup>, Urban Ösby *Senior researcher*<sup>1,6,7,8</sup>

<sup>1</sup>Centre for Family Medicine (CeFAM), Department of Neurobiology, Care Sciences, and Society, Karolinska Institutet, -Stockholm, Sweden.

<sup>2</sup>Department of Medical Epidemiology and Biostatistics (MEB), Karolinska Institutet, Stockholm, Sweden.

<sup>3</sup>THL, National Institute for Health and Welfare, Helsinki, Finland.

<sup>4</sup>Department of Cardiology, -Lunds Universitet, Lund, Sweden

<sup>5</sup>Institute of Environmental Medicine, Karolinska Institutet, Stockholm, Sweden.

<sup>6</sup>Department of Molecular Medicine and Surgery, Neurogenetics, Karolinska Institutet, Stockholm, Sweden.

<sup>7</sup>Center for Molecular Medicine, Karolinska Institutet, Stockholm, Sweden.

<sup>8</sup>[Department of Psychiatry, Tiohundra AB, Norrtälje, Sweden.](#)

Correspondence: Jeanette Westman, PhD  
Alfred Nobels Allé 12, SE 141 83 Huddinge, Sweden  
Email: [jeanette.westman@ki.se](mailto:jeanette.westman@ki.se)  
Telephone: +46-(0)8-524 800 00  
Fax: +4-(0)8-524 887 06

Word count of text: [31312471](#)

**Formatted:** Font: (Default) Times New Roman, 12 pt, English (U.S.), Superscript

**Formatted:** Font: (Default) Times New Roman, 12 pt, English (U.S.)

**Formatted:** English (U.S.)

## Article summary

### Article focus

- To estimate mortality in cardiovascular disease (CVD) and its subgroups cerebrovascular and coronary heart disease and acute myocardial infarction among 17,101 persons diagnosed with bipolar disorder during 1987 to 2006 in Sweden, compared to the general population in a national register study with a 20-year follow-up.

Formatted: Font: Bold

Formatted: Normal, No bullets or numbering

Formatted: Font: Times New Roman, 12 pt

Formatted: Bulleted + Level: 1 + Aligned at: 0.25" + Indent at: 0.5"

Formatted: Font: Times New Roman, 12 pt

Formatted: Font: Times New Roman, 12 pt

Formatted: Font: Times New Roman, 12 pt

### Key messages

- Persons with bipolar disorder died of CVD approximately ten years early. Excess mortality of both CVD (n=824) and other somatic diseases (n=988) was higher than that of suicide and other external causes (n=675 deaths). Excess mortality from CVD and other somatic diseases was three times higher (1,812 deaths) than suicide and other external unnatural causes (675 deaths). Mortality rate ratios (MRRs) for cerebrovascular disease, coronary heart disease, and acute myocardial infarction, were twice as high compared to the general population. Despite the increased mortality, hospital admissions, admission rate ratios (ARR) for CVD treatment in persons with bipolar disorder were only slightly increased.
- The increased cardiovascular mortality in persons with bipolar disorder calls for renewed efforts more resources to prevent and treat somatic diseases. Specifically, our findings imply that it would be critical to ensure that persons with bipolar disorder receive the same quality care for CVD as the population.

Formatted: Font: Bold

Formatted: Bulleted + Level: 1 + Aligned at: 0.25" + Indent at: 0.5"

Formatted: Bulleted + Level: 1 + Aligned at: 0.25" + Indent at: 0.5"

### Strengths and limitations of this study of this study

- A large national cohort with comprehensive data on patient characteristics was studied. Mortality data from the Swedish cause of death register are of high quality.
- Clinical information on symptoms and treatment were lacking.

Formatted: Font: Bold

Formatted: Font: Bold

Formatted: Bulleted + Level: 1 + Aligned at: 0.25" + Indent at: 0.5"

**ABSTRACT** (word count: 2654)

**Objective:** To estimate cardiovascular mortality among persons with bipolar disorder in Sweden compared to the general population.

**Design:** Population register based cohort study with a 20-year follow-up.

**Setting:** Sweden.

**Participants:** The entire population of Sweden (n=10.6 million) of whom 17,101 persons were diagnosed with bipolar disorder between 1987 and 2006.

**Main outcome measures:** Mortality rate ratios (MRR), excess mortality (excess deaths), cardiovascular disorders (CVD) and specifically cerebrovascular disease, coronary heart disease, ~~and~~ acute myocardial infarction, ~~sudden cardiac deaths,~~ and hospital admission rate ratios (ARR).

**Results:** Persons with bipolar disorder died of CVD approximately ten years earlier than ~~did~~ ~~persons of~~ the general population. ~~More than two~~ ~~One~~ thirds (37.3%) of all deaths in persons with bipolar disorder were caused by CVD, ~~and~~ almost half (44%) by other somatic diseases, whereas suicide and other ~~unnatural~~ ~~external~~ causes accounted for less ~~than a fifth~~ ~~than a third~~ of all deaths (12.7%). Excess mortality of ~~both~~ CVD (n=824) and other somatic diseases (n=988) was ~~three times~~ higher (4,812 deaths) than that of suicide and other ~~external~~ ~~unnatural~~ causes (n=675 deaths). MRRs -for cerebrovascular disease, coronary heart disease, and acute myocardial infarction, were twice as high in persons with bipolar disorder compared to the general population. Despite the increased mortality of CVD, ~~hospital~~ ~~admissions (ARR)s~~ for CVD treatment were only slightly increased in persons with bipolar disorder when compared to the general population.

**Conclusions:** The increased cardiovascular mortality in persons with bipolar disorder calls for ~~renewed efforts~~ ~~more resources~~ to prevent and treat somatic diseases in this group. Specifically, our findings further imply that it would be critical to ensure that persons with bipolar disorder receive the same quality care for CVD as persons without bipolar disorder.

## Introduction

Cardiovascular disease (CVD) is the main cause of death in many developed countries.<sup>1</sup> CVD encompasses a broad range of different conditions that are potentially life threatening. In Sweden, although mortality from CVD in the population has almost halved in the last two decades, CVD still accounts for more than 40% of all deaths in the country.<sup>2</sup> Premature death in patients with severe mental health disorders, especially patients with schizophrenia and bipolar disorder, has historically been generally-attributed to suicide, ~~rather than CVD, despite~~ However, more recent studies have showing that CVD leads to more reduced~~shorter~~ life spans than does suicide in those patients.<sup>3</sup> Persons with bipolar disorder have an increased risk of CVD and have been observed to die due to CVD twice as often as the general population.<sup>4-6</sup> Although previous studies have shown an association between bipolar disorder and mortality from CVD, few studies have addressed mortality rates in different CVD subgroup~~types of~~ vascular mortality, or examined ~~their related~~ use of health care. An improved understanding of the causes behind and magnitude of CVD among bipolar patients is warranted along with an in-depth evaluation of different diagnostic CVD subgroups. The answers to these questions, which are far less investigated in bipolar disorder than in among patients with schizophrenia, are essential in the efforts to address the problem of premature deaths due to CVD in persons with bipolar disorder. ~~patients~~ These questions are the focus of the present national register-based study, which extends earlier Swedish findings<sup>5</sup> both by more specific CVD mortality analyses and more recent patient data.

The aim of this study was to evaluate excess mortality from CVD, such as cerebrovascular disease and coronary heart disease with acute myocardial infarction as its most important component, and also CVD hospitals admissions, in people with bipolar disorder~~persons with~~ bipolar disorder -in Sweden between 1987 and 2006 compared to the population.

Field Code Changed

Field Code Changed

Field Code Changed

Field Code Changed

Formatted: Superscript

## Methods

### Cohort and follow-up

All persons who resided in Sweden between the 1<sup>st</sup> of January 1987 and the 31<sup>st</sup> of December 2006 (n=10,631,-208) were identified using the Swedish Total Population Register (TPR).

The TPR was established in 1968 and contains information on sex, date and place of birth, [and](#) date of migration of every resident in Sweden. Information on hospital admission, medical diagnosis, and cause of death was obtained by linking the TRP with the national Swedish Cause-of-Death Register and the National Patient Register (NPR) using each resident's unique personal identification number.

The NPR, which is maintained by the National Board of Health and Welfare, contains information on all hospital in-patient treatments ~~carried out~~ in Sweden since 1987. For psychiatric in-patient care the register has nationwide coverage dating back from 1973. For each hospitalization, the unique national registration number, date of admission and discharge, and diagnosis are registered in NPR. In Sweden, all hospital diagnoses are classified according to the WHO International Classification of Diseases (ICD). Since the diagnostic definitions of affective disorders were substantially changed in ICD-9 and ICD-10 as compared with ICD-8, only patients diagnosed with bipolar disorder according to ICD-9 or ICD-10 were included in the study. Bipolar diagnoses recorded between 1987 and 1996 were identified using ICD-9 (296A, C, E, 298B). From 1997 and later, ICD-10 (F30-F31) was used to identify bipolar diagnoses. The Swedish Cause of Death Register (CDR) includes all individuals who were registered in Sweden at the time of death. The register provides information on date of death as well as main (underlying) and secondary causes of death based on death certificates. Definitions regarding causes of death and ICD codes used in this study are shown in Figure 1.

A total of 20,248 patients admitted to hospital between 1<sup>st</sup> of January 1987 and 31<sup>st</sup> of December 2006 with a main diagnosis of bipolar disorder (ICD-9; ICD-10) were identified in the NPR. Of the 20,248 patients, 3,147 had been previously diagnosed with schizophrenia (ICD-8: 295; ICD-9: 295; ICD-10; F20, F25) and were consequently excluded. Thus, the total risk population of the study comprised 17,101 patients with bipolar disorder. The follow-up period was 20 years (1987-2006). Immigrants were included from the date of immigration to Sweden. Each person was followed until December 31, 2006, or date of death or emigration,

depending on which came first. Inclusion in the risk population started from the date of first hospital admission (discharge diagnosis) during the study period.

### Statistical analysis

Person years at risk, number of cause-specific deaths and hospital admissions due to CVD for both bipolar patients and the general population were determined. Person time was stratified by sex, calendar year and age. Mortality rate ratios (MRR) and Admission rate ratios (ARR) and predicted mortality rates were calculated with corresponding 95% confidence intervals (CI) using Poisson regression models with the GENMOD procedure using statistical software SAS (version 9.2). All models were adjusted for or stratified by sex, attained age and year of follow-up.

To calculate the excess mortality for patients with bipolar disorder the observed number of deaths was compared with the expected number of deaths among patients with bipolar disorder. The expected number of deaths was calculated by applying age, sex and calendar specific mortality rates in the general population to the time at risk among the patients.

The risk of dying from CVD after first hospital admission was analyzed by estimating cause-specific survival curves using the Kaplan-Meier method. Additional adjusted hazard ratios with 95% CIs were estimated using Cox proportional hazard models.

When hospital admission due to CVD (Admission rate ratios, ARR) was the event of interest, follow-up ended on the day of first admission. To ensure that the observed cases were incident, a three-year run-in period was created to compensate for the lack of CVD coverage in the NPR before 1987. Hence, all bipolar patients analyzed had no hospital admissions due to CVD recorded for at least three years before follow-up.

## Results

### Causes of death

Total mortality (death from any cause) between 1987 and 2006 in Sweden was more than twice as high among patients with bipolar disorder compared to the general population (MRR 2.40; 95% CI 2.33-2.47). Specifically, 2,489 excess deaths in patients with bipolar disorder were observed (Table 1). With mortality causes subdivided into CVD, other somatic, and unnatural/external causes of death, we found that men and women with bipolar disorder were



twice as likely to die of CVD compared to the general population (MRR 2.03; 95% CI 1.93-2.13), with 824 excess deaths due to CVD. Mortality from other somatic causes was also doubled (MRR 2.10; 95% CI 2.00-2.19), with 988 excess deaths. Unnatural External causes of death, such as suicide, homicides, and accidents, were increased more than nine times in bipolar patients (MRR 9.66; 95% CI 8.99-10.37), with 675 excess deaths. As far as CVD subgroups were concerned, mortality from cerebrovascular disease and coronary heart disease and cerebrovascular disease was twice as high in bipolar patients, with 377 excess deaths (MRR 1.95; 95% CI 1.81-2.09) and 184 excess deaths (MRR 2.00; 95% CI 1.81-2.2209) and 377 excess deaths (MRR 1.95; 95% CI 1.81-2.09), respectively. Mortality from acute myocardial infarction was almost twice as high in bipolar patients (MRR 1.83; 95% CI 1.67-2.01), with 200 excess deaths. Mortality from sudden cardiac death, cardiac arrest/ventricular fibrillation, was also increased (MRR 1.85; 95% CI 1.42-2.41), with 25 excess deaths. Bipolar women and men of all ages had an equally increased mortality from CVD (data not shown).

#### Age and cause of death

MRR by age at death for all causes of death is shown in Fig 2a and subdivided into cardiovascular death (Fig 2b), other somatic death (Fig 2c), suicide and other external causes of death (Fig 2c). Cerebrovascular death (Fig 2e), death by coronary heart disease (Fig 2f), and death from acute myocardial infarction (Fig 2g) are reported separately.

MRR for CVD was increased for bipolar patients across all ages but was particularly pronounced in the young age groups (Figure 2b). Patients with bipolar disorder who died of CVD were younger than people in the general population. The same finding was observed when we subdivided CVD into cerebrovascular disease, coronary heart disease and acute myocardial infarction (Figure 2e-g). For acute myocardial infarction and coronary heart disease the increased risk was most apparent in the 55-65 years age groups (2f-g). In the ages below 50 years the results should be interpreted with caution because there were very few events in these ages. Death by suicide and other unnatural external causes of deaths were 15 times more common among bipolar patients below 30 years of age compared to persons of the same age in the general population (Figure 2d). Overall, the MRR for suicide and other unnatural external causes of deaths decreased with increasing age. However, it should be noted that it remained significantly increased in persons aged between 70-74 years (MRR 6.88; CI 95% 5.06-9.35) (Figure 2d).

8

[Age differences at death between persons with bipolar disorder and the population from coronary heart disease, acute myocardial infarction and cerebrovascular disease is shown in Figure 3a-3c. The earlier age at death for persons with bipolar disorder is clearly shown for all these causes of death.](#)

Formatted: Font Alignment: Top

### Admission rates

Hospital admission rates for CVD among patients with bipolar disorder were similar to those for the general population even though MRR for CVD was almost twice as high, independent of the specific CVD cause (Tables 1 and 2). Survival rates five years after first hospital admission for CVD were significantly lower among bipolar patients than among the general population (Figure 4).

## Discussion

### Key findings

In this nationwide study of mortality among persons with bipolar disorder in Sweden compared to the population, somatic illness was the main cause of death. Bipolar patients died of CVD around ten years earlier than the general population. Mortality from cerebrovascular disease, coronary heart disease, and acute myocardial infarction was twice as high in bipolar patients as in the general population, while the frequency of hospital admissions due to these diseases was not increased. Our findings ~~clearly~~ showed that CVD [in persons with bipolar disorder accounted for 824 excess deaths](#) and other somatic diseases [988 in persons with bipolar disorder accounted for a substantial number of excess deaths, taken together \(n=1,812\) excess deaths, both](#) larger than suicide and other ~~unnatural~~ [external](#) causes of death (n=675). [Interestingly, sudden cardiac death was also increased.](#)

### Strengths and limitations

The Swedish National Patient Register and Cause of Death Register include everyone who resides in the country and are considered unique, comprehensive and highly credible. Currently more than 99% of all somatic and psychiatric hospital discharges are recorded in the National Patient Register,<sup>7</sup> Swedish hospitals and government agencies are obliged by law to enter medical information in the National Patient Register. All diagnoses in the National Patient and Cause of Death registers were given by patients' doctors using international

Field Code Changed

classification standards (ICD codes). Being register based, this study used information about clinical diagnoses from hospital admissions in Sweden. During the study period, the ICD diagnostic definitions were specific for bipolar disorder. A validation of the Swedish clinical bipolar [hospital](#) diagnoses has shown high validity, sufficient for epidemiological studies.<sup>8</sup> One limitation of this study was that it was based on in-patient diagnoses, which may have generated a selective bias towards severely ill patients. However, most individuals at severe stages of bipolar disorder are admitted to hospital in Sweden. [Since medical care is free in Sweden, there is no bias by costs for hospital care leading to differences in health-seeking behavior.](#) In a previous study, we have shown that the number and frequency of hospital admissions due to bipolar disorder remained relatively unchanged ~~in Sweden~~ during recent years, while the overall number of psychiatric admissions was drastically reduced.<sup>9</sup> We did not have access to medical records or information on medical treatment, ~~which would have been of interest since antidepressants use have been linked to increased risk of fatal coronary heart disease.~~<sup>10</sup> In terms of the validity of the data on causes of death, in CVD deaths we found a slightly higher autopsy rate (28%) among patients with bipolar disorder than in the general population (22%). It is unlikely that these small differences affected the outcome of the study. [An advantage with the present study is the analysis of specific causes of death.](#)

Field Code Changed

Field Code Changed

Formatted: Font: (Default) Times New Roman, 12 pt, Not Italic

Formatted: Font: (Default) Times New Roman, 12 pt, Not Italic

### Findings from other studies

The findings of this study add to the growing body of evidence that somatic diseases, particularly CVD, contribute to a shorter lifespan among bipolar patients. Findings from several large register-based studies from different parts of the world indicate that cardiovascular disease is responsible for the majority of excess deaths, with up to 2.5-fold increased mortality.<sup>3 5 6 10-14 15-16</sup> Studies using registers from the Nordic countries have shown that ~~in~~ bipolar patients run almost twice the risk of dying from CVD than do persons in the general population, the mechanisms for which are currently unknown.<sup>4 5</sup> [There is a growing body of evidence from studies in other countries, and findings similar to ours have been observed in a representative study of the US population.](#)<sup>15</sup> [In our previous study, SMR for CVD but not for cerebrovascular mortality was higher for women compared to men. This difference was not found in our present study. SMR and MRR are relative measurements, affected both by population trends and trends among the cases. Thus, the different findings could be related both to changing mortality rates in the population and to changes among persons with bipolar disorder, or a combination of those factors. CVD contains several different causes of mortality, which may have different trends over time. However, the](#)

Field Code Changed

Field Code Changed

specific causes of death related to the sex difference in CHD mortality previously found cannot be answered in our study.

There is also a growing body of evidence from studies in other countries, and similar findings have been observed in a representative study of the US population (Goldstein et al 2009).

Studies have shown a higher cardiovascular mortality in persons with bipolar disorder type I compared to bipolar disorder type II or major depressive disorder. (16,17 Fiedorowicz 2009,

Angst 2012). In our Swedish data, bipolar disorder type I can-not be separated from bipolar disorder type II. However, patients with bipolar disorder type I are much more likely to be

hospitalized and thus to be included in our sample. Earlier age of CVD has been shown in several studies,<sup>15</sup> and is also confirmed in which findings of increased cardiovascular

death at a younger age compared to the population in Sweden also confirm findings of increased cardiovascular disease at a younger age compared to the population. Possible risk

factors for the increased mortality from CVD among bipolar patients may include adverse effects of medication,<sup>18,19,16,17</sup> high levels of smoking,<sup>20,18</sup> unhealthy diet,<sup>21,22,19,20</sup> lack of

physical activity,<sup>21,19</sup> and low social-economic status,<sup>23,24</sup> and lower rates of nutritional

counseling.<sup>24</sup> Studies have shown that bipolar disorder patients deviate from age-based norms on arterial stiffness measures.<sup>25</sup> Also, inflammation has been pointed out as a potential

biological cause of increased CVD in bipolar disorder<sup>30,31</sup> together with endothelial dysfunction.<sup>32</sup> In addition, effects of genetic associations, such as those reported between

Type 2 diabetes, CHD and schizophrenia,<sup>26,22</sup> could not be excluded. One of the most important locuses of genetic polymorphisms linked to bipolar disease and depression is

around the ATP-activated ion-channel receptor *P2X7*.<sup>27,23</sup> Recently, a polymorphism in the *P2X7* gene was linked to increased risk of stroke and acute myocardial infarction,<sup>28,24</sup> and the

same polymorphism has also recently been shown to be linked to cognitive symptoms in bipolar disorder,<sup>29,25</sup> indicating that common genetic factors could have effect on both cardiovascular disease and bipolar disorder.

**CVD undertreated in bipolar disorder persons with bipolar disorder**

Studies of patients with bipolar disorder have shown that the patients have an increased risk of metabolic syndrome,<sup>33,26</sup> i.e. increased blood glucose,<sup>34,27</sup> and cholesterol levels,<sup>35,28</sup>

higher blood pressure,<sup>36,29</sup> and higher prevalence of overweight and obesity,<sup>21,19</sup> closely associated with CVD. To prevent and treat metabolic disorders in patients with severe mental

Formatted: Superscript

Formatted: Superscript

Field Code Changed

Formatted: Superscript

Formatted: Superscript

Field Code Changed

Field Code Changed

Field Code Changed

Formatted: Font: 12 pt

Formatted: Font: 12 pt

Formatted: Font: 12 pt

Formatted: Font: 12 pt

Field Code Changed

Formatted: Font: 12 pt

Formatted: Font: 12 pt

Field Code Changed

Formatted: Font: 12 pt

Field Code Changed

Formatted: Font: 12 pt

Formatted: Font: 12 pt

Formatted: Font: 12 pt

Field Code Changed

Formatted: Font: 12 pt

illnesses such as bipolar disorder, ~~new guidelines for clinicians in Sweden were drawn up in 2009, thus after the end of this study, by psychiatrists, diabetologists, endocrinologists, cardiologists and general practitioners in collaboration have been drawn up for clinicians in Sweden.~~<sup>3730</sup> However the effects of those guidelines are still to be evaluated. The guidelines can be found on the website of the Swedish Psychiatric Association ([www.svenskpsykiatri.se](http://www.svenskpsykiatri.se)). In the guidelines, there is a strong emphasis on the increased metabolic risks at younger age, with focus both on primary and secondary prevention strategies and the need for collaboration between the different medical specialties. The effects of those guidelines are still to be evaluated.

Our finding that patients with bipolar disorder showed only slightly increased hospital admissions rates for CVD despite their twice as high cardiovascular mortality, strongly suggests that CVD is undertreated in bipolar patients when compared to the general population. ~~In a Danish study, the rates of invasive heart disease procedures were 40% lower among persons with bipolar disorder than in the general population.~~<sup>4</sup> Although the younger age at cardiac events in bipolar disorder compared to the population may reduce detection, this factor is unlikely to cause the reduced rates of invasive heart procedures, since younger age at detection would rather be expected to lead to more intensive treatment. The lower rate of invasive heart disease procedures among persons with bipolar disorder is yet to be explained. Sudden cardiac mortality from cardiac arrest/ventricular fibrillation was increased among patients with bipolar disorder (MRR: 1.85), but the 25 excess cases does not explain the difference in CVD hospital admissions in terms of increased sudden death before hospital admission. Thus, the reasons for CVD undertreatment in bipolar disorder is not explained by the current findings. ~~Our register data alone cannot offer an explanation for this finding.~~ In our study, the MRR and ARR patient populations are slightly different, in the respect that the ARR patients are identified at their first index admission, while the MRR patients may have several admissions, and thus being more severely affected. Unequal access to health care (i.e. receiving cardiac treatment of lower quality) for reasons other than financial has been previously suggested as a contributor to excess CVD mortality in patients with severe mental disorders, such as schizophrenia,<sup>3831</sup> and may be indicated by our findings of increased mortality after discharge from hospital compared to the population. These factors have not been studied extensively in bipolar patients. Health care in Sweden is free and is financed primarily through taxes. Therefore, it is unlikely that patients with bipolar disorder do not seek hospital care for lack of financial means.

Formatted

Formatted

Formatted: Font: 12 pt

Formatted: Font: 12 pt

Formatted: Font: 12 pt

Formatted

Formatted

Formatted

Field Code Changed

Formatted

Formatted: Font color: Auto

Formatted: Font: 12 pt

Formatted: Font: 12 pt, No underline, Font color: Auto

Formatted: Font: 12 pt, No underline, Font color: Auto

Formatted: Font: 12 pt, No underline, Font color: Auto

Formatted: No underline, Superscript

Formatted: No underline, Font color: Text 1

Field Code Changed

1  
2  
3  
4  
5  
6  
7  
8 Many mechanisms can contribute to the under-treatment of CVD among people with bipolar  
9 disorder. Our results indicate a failure of the health care system to identify and address the  
10 health needs of those patients, which has also been shown in other studies of people with  
11 severe mental disorders.<sup>39,42</sup> The levels of CVD mortality in our bipolar persons are similar to  
12 those in schizophrenia, where adverse effects of antipsychotic medication have been  
13 considered the main contributing factor. When compared with schizophrenia, a recent study  
14 of bipolar disorder in Stockholm County found only 29% of bipolar patients medicating with  
15 antipsychotics, as compared to practically all schizophrenia patients, which raises the question  
16 of the importance of adverse effects of antipsychotics in CVD.<sup>40,43</sup>  
17  
18  
19  
20  
21

Field Code Changed

### 22 **Conclusions**

23 The observed number of deaths from cardiovascular diseases in patients with bipolar  
24 disorders was almost twice as the expected number when comparing with the general  
25 population, suggesting that more resources are needed for the prevention of these diseases in  
26 this patient group. Targeted interventions by effective cooperation between primary health  
27 care and psychiatric professionals would be crucial in the efforts to reduce excess CVD  
28 mortality in patients with bipolar disorder. Finally, effective cardiac treatment would ensure  
29 longevity and improved quality of life for ~~bipolar~~ patients with bipolar disorder.  
30  
31  
32  
33  
34  
35  
36  
37  
38  
39  
40  
41  
42  
43  
44  
45  
46  
47  
48  
49  
50  
51  
52  
53  
54  
55  
56  
57  
58  
59  
60

1  
2  
3  
4  
5  
6  
7  
8  
9  
10  
11  
12  
13  
14  
15  
16  
17  
18  
19  
20  
21  
22  
23  
24  
25  
26  
27  
28  
29  
30  
31  
32  
33  
34  
35  
36  
37  
38  
39  
40  
41  
42  
43  
44  
45  
46  
47  
48  
49  
50  
51  
52  
53  
54  
55  
56  
57  
58  
59  
60

13

For peer review only



**Contributors:** UÖ had the idea of the study and is guarantor of the study together with JH, who has performed the statistical analyses. JW has contributed to the design of the study and drafted the manuscript together with UÖ. KW, DE and LA have contributed to the design of the study and with revisions of the manuscript. All authors have approved the final version of the study.

**Funding:** This paper was supported by Swedish Council for Working Life and Social Research (grant number FAS 2008-0885) and Stockholm County Council (Grant number PPG -20120263). The study was conducted and analyzed independently from its funders.

**Competing interests:** All authors have completed the ICMJE uniform disclosure form (available on request from the corresponding author). JW, KW, LA, DE, UÖ has declared no support from any organization for the submitted work, no financial relationship with any organizations that would have interest in the submitted work in the previous three years, and no other activities that could appear to have influenced the submitted work. UÖ has declared traveling expenses from Janssen-Cilag for attending a course in October 2012 unrelated to the study.

**Ethical approval:** This study was approved by the ethical review board in Stockholm County. The ethical review board determined that informed consent from participating individuals was not required.

**Data sharing:** The analysis data set for this study is available from the National Board of Health and Welfare (Socialstyrelsen) in Sweden. Please contact JH for further information.

**Licence for publication:** The Corresponding Author has the right to grant on behalf of all authors and does grant on behalf of all authors, an exclusive licence on a worldwide basis to the BMJ Publishing Group Ltd and its Licensees to permit this article (if accepted) to be published in BMJ editions and any other BMJ PGL products and sublicences to exploit all subsidiary rights, as set out in our licence ( <http://resources.bmj.com/bmj/authors/checklists-forms/licence-for-publication>).



Figure 1. ICD-coding and disease classification of disease and mortality.



1  
2  
3  
4  
5  
6  
7  
8  
9  
10  
11  
12  
13  
14  
15  
16  
17  
18  
19  
20  
21  
22  
23  
24  
25  
26  
27  
28  
29  
30  
31  
32  
33  
34  
35  
36  
37  
38  
39  
40  
41  
42  
43  
44  
45  
46  
47  
48  
49  
50  
51  
52  
53  
54  
55  
56  
57  
58  
59  
60



1  
2  
3  
4  
5  
6  
7  
8  
9  
10  
11  
12  
13  
14  
15  
16  
17  
18  
19  
20  
21  
22  
23  
24  
25  
26  
27  
28  
29  
30  
31  
32  
33  
34  
35  
36  
37  
38  
39  
40  
41  
42  
43  
44  
45  
46  
47  
48  
49

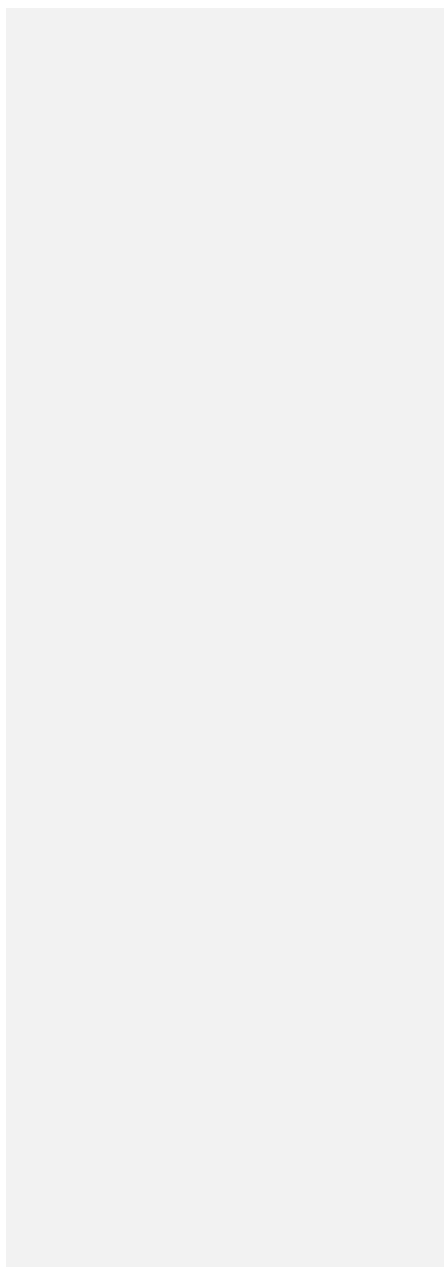

Table 2. Admission rate ratios (ARR) for ~~bipolar patients~~ persons with bipolar disorder during 1990 to 2006

| Hospital admissions         | Men   |                  | Women |                  | Total (both sexes) |                  |                       |
|-----------------------------|-------|------------------|-------|------------------|--------------------|------------------|-----------------------|
|                             | Cases | ARR (95% CI)     | Cases | ARR (95% CI)     | Cases              | ARR (95% CI)     | Excess cases (95% CI) |
| Cardiovascular disease      | 540   | 1.27 (1.16-1.38) | 696   | 1.33 (1.24-1.43) | 1236               | 1.30 (1.23-1.38) | 287 (218-356)         |
| Cerebrovascular disease     | 179   | 1.32 (1.14-1.53) | 271   | 1.43 (1.27-1.62) | 450                | 1.39 (1.26-1.52) | 125 (84-167)          |
| Coronary heart disease      | 212   | 1.02 (0.89-1.17) | 207   | 1.06 (0.92-1.21) | 419                | 1.04 (0.94-1.14) | 15 (-25-55)           |
| Acute myocardial infarction | 133   | 0.96 (0.81-1.14) | 137   | 1.11 (0.94-1.31) | 270                | 1.03 (0.92-1.16) | 8 (-24-41)            |

Review only

Figure 2a. Mortality Rate Ratios (MRR) for all causes of death by age at death in persons with bipolar disorder patients and the general population.

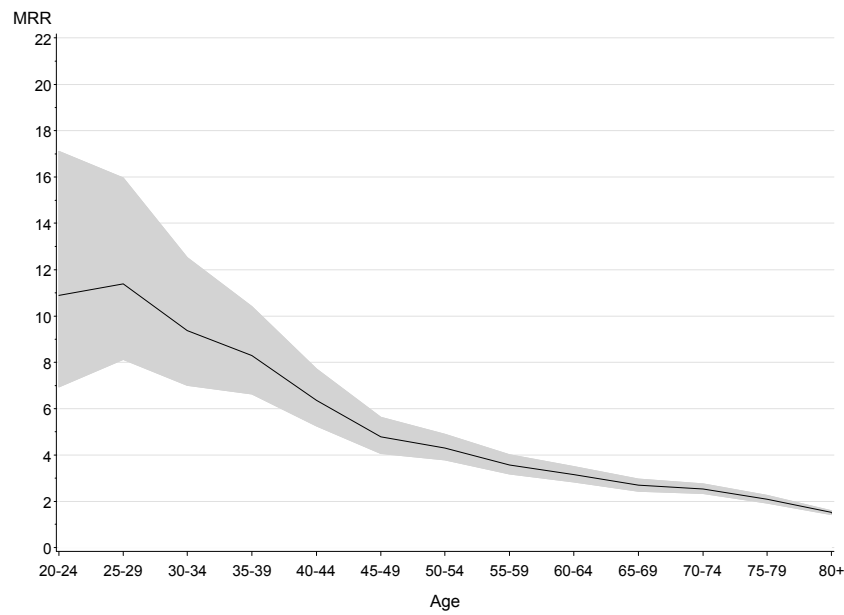

Figure 2b. Mortality Rate Ratios (MRR) for cardiovascular death by age at death in bipolar disorder patients and the general population.

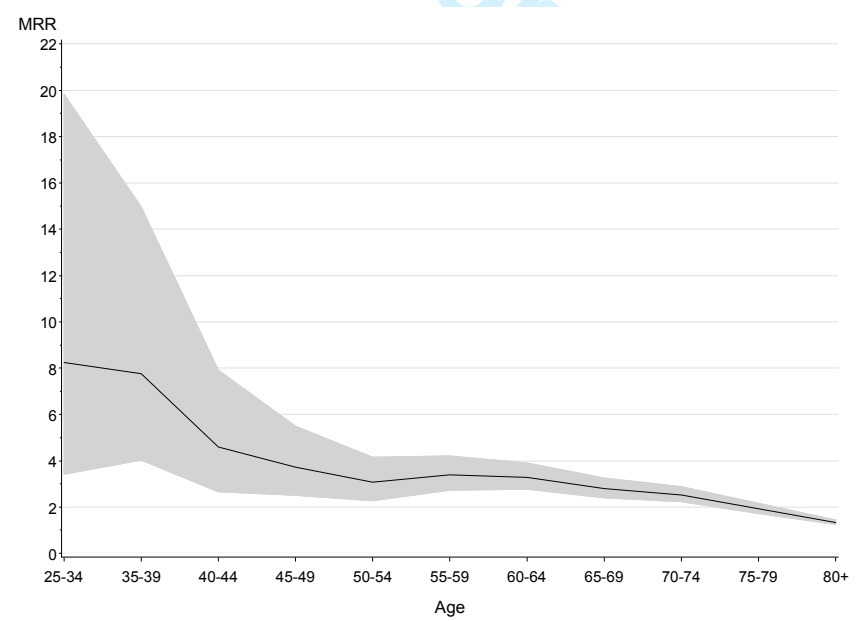

Formatted: Justified

Formatted: Font: Bold, No underline, Font color: Text 1

Formatted: Left

Review only



Formatted: Font: Bold, No underline, Font color: Text 1

Figure 2c. Mortality Rate Ratios (MRR) for other somatic death by age at death in patients with bipolar disorder and the general population.

1  
2  
3  
4  
5  
6  
7  
8  
9  
10  
11  
12  
13  
14  
15  
16  
17  
18  
19  
20  
21  
22  
23  
24  
25  
26  
27  
28  
29  
30  
31  
32  
33  
34  
35  
36  
37  
38  
39  
40  
41  
42  
43  
44  
45  
46  
47  
48  
49

21



Review only

Figure 2d. Mortality Rate Ratios (MRR) of suicide and other unnatural external causes of deaths by age at death in patients with bipolar disorder and the general population.



Review only



Figure 2e. Mortality Rate Ratios (MRR) of cerebrovascular disease by age at death in persons with bipolar disorder and the general population.

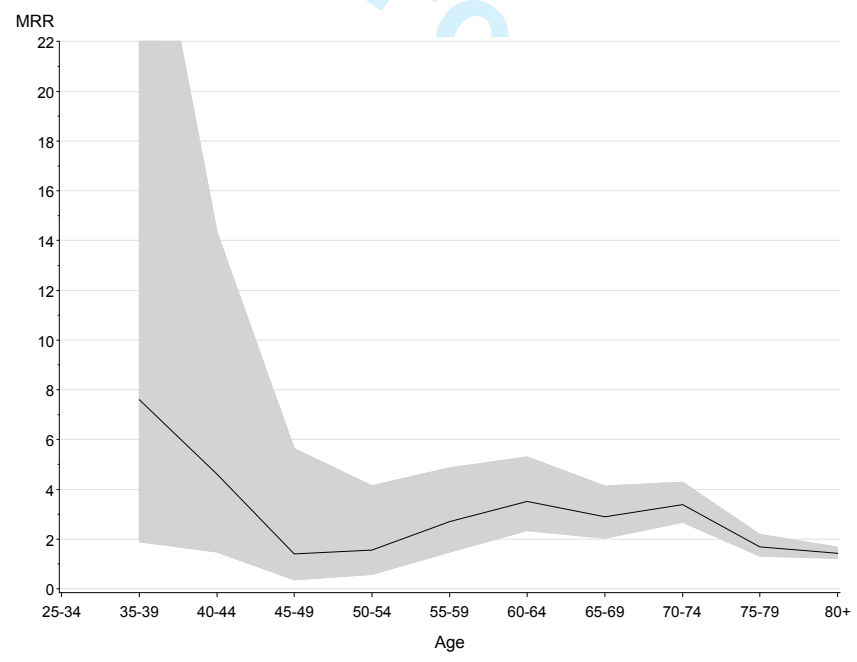

24

Figure 2f. Mortality Rate Ratios (MRR) of coronary heart disease by age at death in persons with bipolar disorder and the general population.

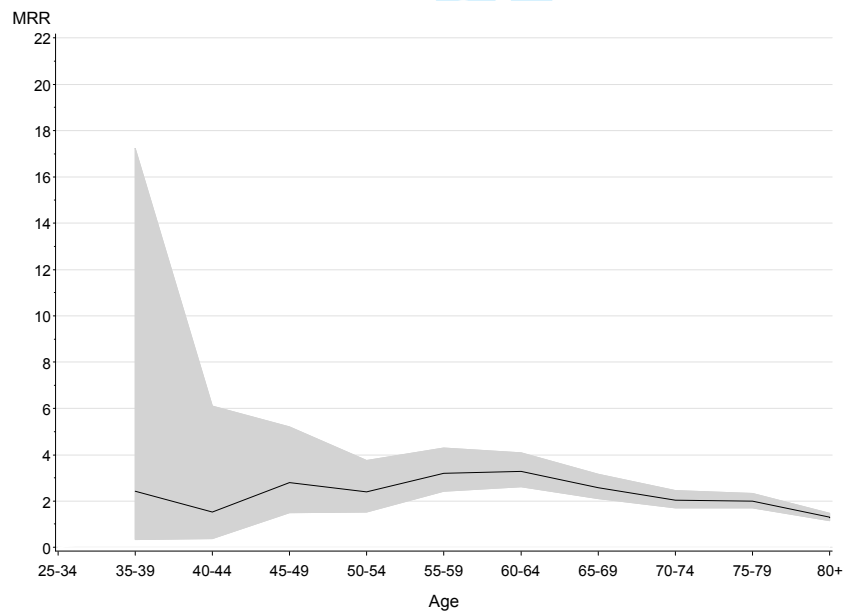

Figure 2g. Mortality Rate Ratios (MRR) of acute myocardial infarction by age at death in persons with bipolar disorder and the general population.



Figure 3a. Mortality of coronary heart disease per 1,000 person-years in persons with bipolar disorder and the general population adjusting for sex and calendar year.



Figure 3b. Mortality of acute myocardial infarction per 1,000 person-years in persons with bipolar disorder and the general population adjusting for sex and calendar year.

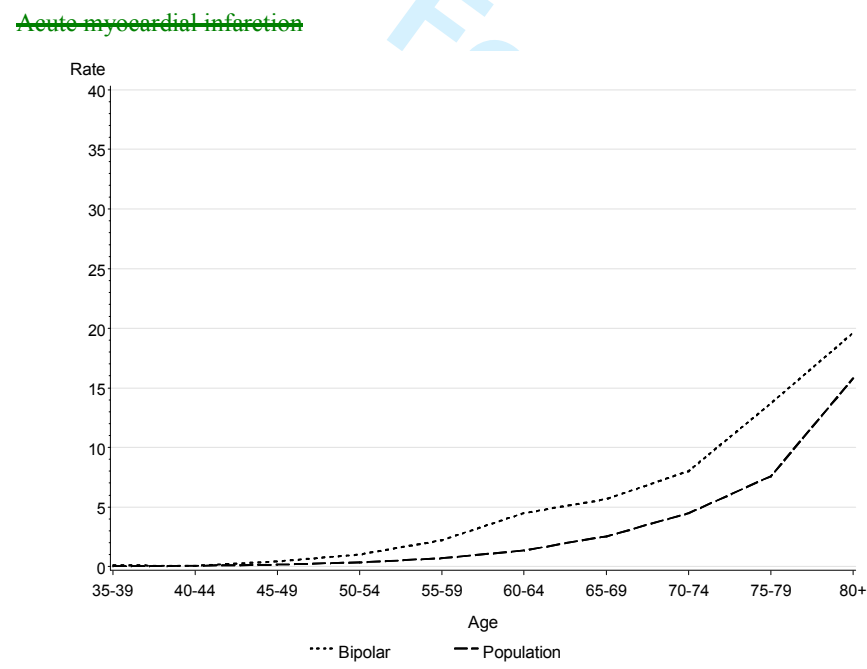

Review only

Figure 3c. Cerebrovascular disease mortality of cerebrovascular disease per 1,000 person-years in persons with bipolar disorder and the general population adjusting for sex and calendar year.

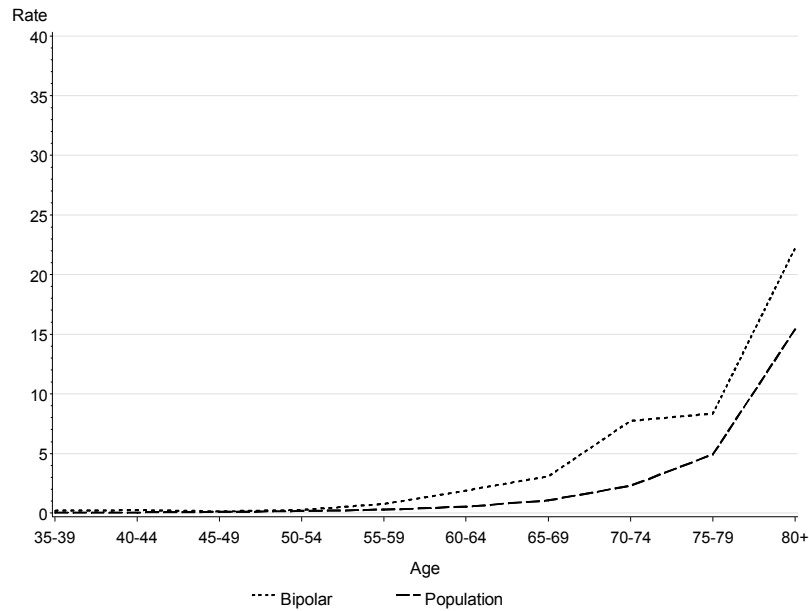

Figure 4. Five-year survival of cardiovascular disease [in persons with bipolar disorder](#) after discharge from first cardiovascular admission stratified by age at hospital contact.

For peer review only

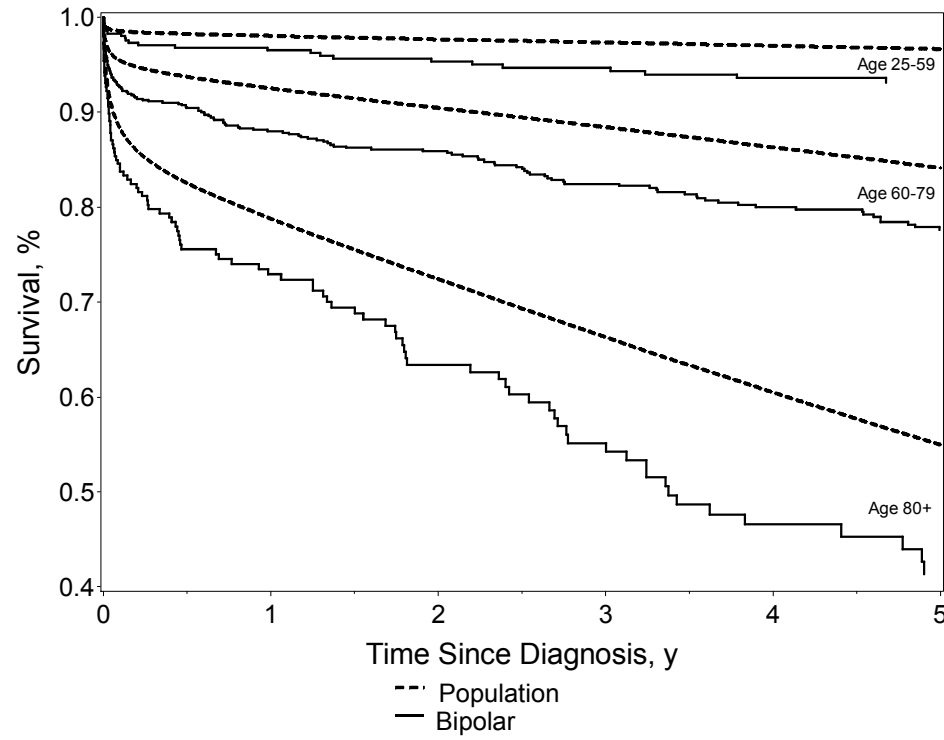

30

view only

Formatted: Tab stops: 5.31", Left



References

1. World Health Organisation. Global atlas on cardiovascular disease prevention and control. Policies, strategies and interventions. WHO, 2011.

2. Socialstyrelsen. Folkhälsorapport 2009 (The National Public Health Report 2009) Stockholm: The National Board of Health and Welfare in Sweden, 2009.

3. Laursen TM. Life expectancy among persons with schizophrenia or bipolar affective disorder. *Schizophr Res*;131(1-3):101-4.

4. Laursen TM, Nordentoft M. Heart disease treatment and mortality in schizophrenia and bipolar disorder - changes in the Danish population between 1994 and 2006. *J Psychiatr Res*;45(1):29-35.

5. Osby U, Brandt L, Correia N, Ekblom A, Sparen P. Excess mortality in bipolar and unipolar disorder in Sweden. *Arch Gen Psychiatry* 2001;58(9):844-50.

6. Laursen TM, Munk-Olsen T, Nordentoft M, Mortensen PB. Increased mortality among patients admitted with major psychiatric disorders: a register-based study comparing mortality in unipolar depressive disorder, bipolar affective disorder, schizoaffective disorder, and schizophrenia. *J Clin Psychiatry* 2007;68(6):899-907.

7. Ludvigsson JF, Andersson E, Ekblom A, Feychting M, Kim JL, Reuterwall C, et al. External review and validation of the Swedish national inpatient register. *BMC Public Health*;11:450.

8. Sellgren C, Landen M, Lichtenstein P, Hultman CM, Langstrom N. Validity of bipolar disorder hospital discharge diagnoses: file review and multiple register linkage in Sweden. *Acta Psychiatr Scand*;124(6):447-53.

9. Osby U, Tiainen A, Backlund L, Edman G, Adler M, Hallgren J, et al. Psychiatric admissions and hospitalization costs in bipolar disorder in Sweden. *J Affect Disord* 2009;115(3):315-22.

10. McIntyre RS, Danilewitz M, Liauw SS, Kemp DE, Nguyen HT, Kahn LS, et al. Bipolar disorder and metabolic syndrome: an international perspective. *J Affect Disord*;126(3):366-87.

11. Zilber N, Schufman N, Lerner Y. Mortality among psychiatric patients--the groups at risk. *Acta Psychiatr Scand* 1989;79(3):248-56.

12. Lawrence DM, Holman CD, Jablensky AV, Hobbs MS. Death rate from ischaemic heart disease in Western Australian psychiatric patients 1980-1998. *Br J Psychiatry* 2003;182:31-6.

13. Kisely S, Smith M, Lawrence D, Maaten S. Mortality in individuals who have had psychiatric treatment: population-based study in Nova Scotia. *Br J Psychiatry* 2005;187:552-8.

14. Roshanaei-Moghaddam B, Katon W. Premature mortality from general medical illnesses among persons with bipolar disorder: a review. *Psychiatr Serv* 2009;60(2):147-56.

15. Goldstein BI, Fagioliini A, Houck P, Kupfer DJ. Cardiovascular disease and hypertension among adults with bipolar I disorder in the United States. *Bipolar Disord* 2009;11(6):657-62.

Formatted: Tab stops: 5.31", Left

Formatted: Font: Italic, No underline

16. Angst J, Hengartner MP, Gamma A, von Zerssen D, Angst F. Mortality of 403 patients with mood disorders 48 to 52 years after their psychiatric hospitalisation. *Eur Arch Psychiatry Clin Neurosci*.

17. Fiedorowicz JG, Solomon DA, Endicott J, Leon AC, Li C, Rice JP, et al. Manic/hypomanic symptom burden and cardiovascular mortality in bipolar disorder. *Psychosom Med* 2009;71(6):598-606.

18. Sachs G, Bowden C, Calabrese JR, Ketter T, Thompson T, White R, et al. Effects of lamotrigine and lithium on body weight during maintenance treatment of bipolar I disorder. *Bipolar Disord* 2006;8(2):175-81.

19. Newcomer JW. Medical risk in patients with bipolar disorder and schizophrenia. *J Clin Psychiatry* 2006;67(11):e16.

20. Lasser K, Boyd JW, Woolhandler S, Himmelstein DU, McCormick D, Bor DH. Smoking and mental illness: A population-based prevalence study. *JAMA* 2000;284(20):2606-10.

21. McElroy SL, Frye MA, Suppes T, Dhavale D, Keck PE, Jr., Leverich GS, et al. Correlates of overweight and obesity in 644 patients with bipolar disorder. *J Clin Psychiatry* 2002;63(3):207-13.

22. Kruger S, Shugar G, Cooke RG. Comorbidity of binge eating disorder and the partial binge eating syndrome with bipolar disorder. *Int J Eat Disord* 1996;19(1):45-52.

23. Druss BG, Zhao L, Von Esenwein S, Morrato EH, Marcus SC. Understanding excess mortality in persons with mental illness: 17-year follow up of a nationally representative US survey. *Med Care*;49(6):599-604.

24. Goodrich DE, Lai Z, Lasky E, Burghardt AR, Kilbourne AM. Access to weight loss counseling services among patients with bipolar disorder. *J Affect Disord*;126(1-2):75-9.

25. Sodhi SK, Linder J, Chenard CA, Miller del D, Haynes WG, Fiedorowicz JG. Evidence for accelerated vascular aging in bipolar disorder. *J Psychosom Res*;73(3):175-9.

26. Ryan MC, Collins P, Thakore JH. Impaired fasting glucose tolerance in first-episode, drug-naive patients with schizophrenia. *Am J Psychiatry* 2003;160(2):284-9.

27. Lucae S, Salyakina D, Barden N, Harvey M, Gagne B, Labbe M, et al. P2RX7, a gene coding for a purinergic ligand-gated ion channel, is associated with major depressive disorder. *Hum Mol Genet* 2006;15(16):2438-45.

28. Gidlof O, Smith JG, Melander O, Lovkvist H, Hedblad B, Engstrom G, et al. A common missense variant in the ATP receptor P2X7 is associated with reduced risk of cardiovascular events. *PLoS One*;7(5):e37491.

29. Backlund L, Nikamo P, Hukic DS, Ek IR, Traskman-Bendz L, Landen M, et al. Cognitive manic symptoms associated with the P2RX7 gene in bipolar disorder. *Bipolar Disord*;13(5-6):500-8.

30. Goldstein BI, Kemp DE, Soczynska JK, McIntyre RS. Inflammation and the phenomenology, pathophysiology, comorbidity, and treatment of bipolar disorder: a systematic review of the literature. *J Clin Psychiatry* 2009;70(8):1078-90.

31. Leboyer M, Soreca I, Scott J, Frye M, Henry C, Tamouza R, et al. Can bipolar disorder be viewed as a multi-system inflammatory disease? *J Affect Disord*;141(1):1-10.

32. Rybakowski JK, Wykretowicz A, Heymann-Szlachcinska A, Wysocki H. Impairment of endothelial function in unipolar and bipolar depression. *Biol Psychiatry* 2006;60(8):889-91.

Formatted: Font: Italic, No underline

Formatted: Font: Italic, No underline, Swedish (Sweden)

Formatted: No underline, Swedish (Sweden)

Formatted: Swedish (Sweden)

Formatted: No underline, Swedish (Sweden)

Formatted: Font: Italic, No underline

Formatted: Font: Italic, No underline

Formatted: No underline, Swedish (Sweden) ... [2]

Formatted: Swedish (Sweden)

Formatted: No underline, Swedish (Sweden)

Formatted: No underline, Swedish (Sweden) ... [3]

Formatted: No underline, Swedish (Sweden)

Formatted: Swedish (Sweden)

Formatted: No underline, Swedish (Sweden)

Formatted: No underline, Swedish (Sweden) ... [4]

Formatted: Swedish (Sweden)

Formatted: No underline, Swedish (Sweden)

Formatted: Font: Italic, No underline

Formatted: Font: Italic, No underline

Formatted: Font: Italic, No underline

1  
2  
3  
4  
5  
6  
7  
8  
9  
10  
11  
12  
13  
14  
15  
16  
17  
18  
19  
20  
21  
22  
23  
24  
25  
26  
27  
28  
29  
30  
31  
32  
33  
34  
35  
36  
37  
38  
39  
40  
41  
42  
43  
44  
45  
46  
47  
48  
49

33. Fiedorowicz JG, Palagummi NM, Forman-Hoffman VL, Miller DD, Haynes WG. Elevated prevalence of obesity, metabolic syndrome, and cardiovascular risk factors in bipolar disorder. *Ann Clin Psychiatry* 2008;20(3):131-7.

34. Birkenaes AB, Opjordsmoen S, Brunborg C, Engh JA, Jonsdottir H, Ringen PA, et al. The level of cardiovascular risk factors in bipolar disorder equals that of schizophrenia: a comparative study. *J Clin Psychiatry* 2007;68(6):917-23.

35. Fagiolini A, Frank E, Scott JA, Turkin S, Kupfer DJ. Metabolic syndrome in bipolar disorder: findings from the Bipolar Disorder Center for Pennsylvanians. *Bipolar Disord* 2005;7(5):424-30.

36. Johannessen L, Strudsholm U, Foldager L, Munk-Jorgensen P. Increased risk of hypertension in patients with bipolar disorder and patients with anxiety compared to background population and patients with schizophrenia. *J Affect Disord* 2006;95(1-3):13-7.

37. Gotheffors D, Adolfsson R, Attvall S, Erlinge D, Jarbin H, Lindstrom K, et al. Swedish clinical guidelines--prevention and management of metabolic risk in patients with severe psychiatric disorders. *Nord J Psychiatry*;64(5):294-302.

38. Laursen TM, Munk-Olsen T, Agerbo E, Gasse C, Mortensen PB. Somatic hospital contacts, invasive cardiac procedures, and mortality from heart disease in patients with severe mental disorder. *Arch Gen Psychiatry* 2009;66(7):713-20.

39. Manderbacka K, Arffman M, Sund R, Haukka J, Keskimaki I, Wahlbeck K. How does a history of psychiatric hospital care influence access to coronary care: a cohort study. *BMJ Open*;2(2):e000831.

40. Adler M, Backlund L, Edman G, Osby U. Symptoms and treatment of bipolar patients in Sweden. *Int J Psychiatry Clin Pract*;16(3):170-7.

1. World Health Organisation. Global atlas on cardiovascular disease prevention and control. Policies, strategies and interventions., 2011.

2. Socialstyrelsen. Folkhälsorapport 2009 (The National Public Health Report 2009) Stockholm: The National Board of Health and Welfare in Sweden, 2009.

3. Laursen TM. Life expectancy among persons with schizophrenia or bipolar affective disorder. *Schizophr Res*;131(1-3):101-4.

4. Laursen TM, Nordentoft M. Heart disease treatment and mortality in schizophrenia and bipolar disorder - changes in the Danish population between 1994 and 2006. *J Psychiatr Res*;45(1):29-35.

5. Osby U, Brandt L, Correia N, et al. Excess mortality in bipolar and unipolar disorder in Sweden. *Arch Gen Psychiatry* 2001;58(9):844-50.

6. Laursen TM, Munk-Olsen T, Nordentoft M, et al. Increased mortality among patients admitted with major psychiatric disorders: a register-based study comparing mortality in unipolar depressive disorder, bipolar affective disorder, schizoaffective disorder, and schizophrenia. *J Clin Psychiatry* 2007;68(6):899-907.

7. Ludvigsson JF, Andersson E, Ekbom A, et al. External review and validation of the Swedish national inpatient register. *BMC Public Health*;11:450.

8. Sellgren C, Landen M, Lichtenstein P, et al. Hultman CM, Langstrom N. Validity of bipolar disorder hospital discharge diagnoses: file review and multiple register linkage in Sweden. *Acta Psychiatr Scand*;124(6):447-53.

9. Osby U, Tiainen A, Backlund L, et al. Psychiatric admissions and hospitalization costs in bipolar disorder in Sweden. *J Affect Disord* 2009;115(3):315-22.

10. Whang W, Kubzansky LD, Kawachi I, et al. Depression and risk of sudden cardiac death and coronary heart disease in women: results from the Nurses' Health Study. *J Am Coll Cardiol* 2009;53(11):950-8.

11. McIntyre RS, Danilewitz M, Liauw SS, et al. Bipolar disorder and metabolic syndrome: an international perspective. *J Affect Disord*;126(3):366-87.

12. Zilber N, Schufman N, Lerner Y. Mortality among psychiatric patients—the groups at risk. *Acta Psychiatr Scand* 1989;79(3):248-56.

- Formatted: Font: Italic, No underline, Swedish (Sweden)
- Formatted: No underline, Swedish (Sweden)
- Formatted: Swedish (Sweden)
- Formatted: No underline, Swedish (Sweden)
- Formatted: Font: Italic, No underline
- Formatted: Font: Italic, No underline
- Formatted: Font: Italic, No underline
- Formatted: Font: Italic, No underline, Swedish (Sweden)
- Formatted: No underline, Swedish (Sweden)
- Formatted: Swedish (Sweden)
- Formatted: No underline, Swedish (Sweden)
- Formatted: Font: Italic, No underline
- Formatted: Font: Italic, No underline
- Formatted: Font: Italic, No underline
- Formatted: Indent: Left: 0", Hanging: 0.5", Line spacing: single
- Formatted: No underline, English (U.S.)
- Formatted: No underline, English (U.S.)
- Formatted: No underline, English (U.S.)

13. Lawrence DM, Holman CD, Jablensky AV, et al. Death rate from ischaemic heart disease in Western Australian psychiatric patients 1980-1998. *Br J Psychiatry* 2003;182:31-6.
14. Kisely S, Smith M, Lawrence D, et al. Mortality in individuals who have had psychiatric treatment: population-based study in Nova Scotia. *Br J Psychiatry* 2005;187:552-8.
15. Roshanai Moghaddam B, Katon W. Premature mortality from general medical illnesses among persons with bipolar disorder: a review. *Psychiatr Serv* 2009;60(2):147-56.
16. Sachs G, Bowden C, Calabrese JR, et al. Effects of lamotrigine and lithium on body weight during maintenance treatment of bipolar I disorder. *Bipolar Disord* 2006;8(2):175-81.
17. Newcomer JW. Medical risk in patients with bipolar disorder and schizophrenia. *J Clin Psychiatry* 2006;67(11):e16.
18. Lasser K, Boyd JW, Woolhandler S, et al. Smoking and mental illness: A population-based prevalence study. *JAMA* 2000;284(20):2606-10.
19. McElroy SL, Frye MA, Suppes T, et al. Correlates of overweight and obesity in 644 patients with bipolar disorder. *J Clin Psychiatry* 2002;63(3):207-13.
20. Kruger S, Shugar G, Cooke RG. Comorbidity of binge eating disorder and the partial binge eating syndrome with bipolar disorder. *Int J Eat Disord* 1996;19(1):45-52.
21. Druss BG, Zhao L, Von Esenwein S, et al. Understanding excess mortality in persons with mental illness: 17-year follow-up of a nationally representative US survey. *Med Care*;49(6):599-604.
22. Ryan MC, Collins P, Thakore JH. Impaired fasting glucose tolerance in first-episode, drug-naïve patients with schizophrenia. *Am J Psychiatry* 2003;160(2):284-9.
23. Lucae S, Salyakina D, Barden N, et al. P2RX7, a gene coding for a purinergic ligand-gated ion channel, is associated with major depressive disorder. *Hum Mol Genet* 2006;15(16):2438-45.
24. Gidlof O, Smith JG, Melander O, et al. A common missense variant in the ATP receptor P2X7 is associated with reduced risk of cardiovascular events. *PLoS One*;7(5):e37491.
25. Backlund L, Nikamo P, Hukie DS, et al. Cognitive manic symptoms associated with the P2RX7 gene in bipolar disorder. *Bipolar Disord*;13(5-6):500-8.
26. Fiedorowicz JG, Palagummi NM, Forman-Hoffman VL, et al. Miller DD, Haynes WG. Elevated prevalence of obesity, metabolic syndrome, and cardiovascular risk factors in bipolar disorder. *Ann Clin Psychiatry* 2008;20(3):131-7.
27. Birkenaes AB, Opjordsmoen S, Brunborg C, et al. The level of cardiovascular risk factors in bipolar disorder equals that of schizophrenia: a comparative study. *J Clin Psychiatry* 2007;68(6):917-23.
28. Fagiolini A, Frank E, Scott JA, et al. Metabolic syndrome in bipolar disorder: findings from the Bipolar Disorder Center for Pennsylvanians. *Bipolar Disord* 2005;7(5):424-30.
29. Johannessen L, Strudsholm U, Feldager L, et al. Increased risk of hypertension in patients with bipolar disorder and patients with anxiety compared to background population and patients with schizophrenia. *J Affect Disord* 2006;95(1-3):13-7.
30. Gotheffors D, Adolfsson R, Attvall S, et al. Swedish clinical guidelines—prevention and management of metabolic risk in patients with severe psychiatric disorders. *Nord J Psychiatry*;64(5):294-302.

Formatted: No underline, English (U.S.)

Formatted: No underline, English (U.S.)

Formatted: No underline, English (U.S.)

Formatted: English (U.S.)

Formatted: No underline, English (U.S.)

Formatted: No underline, English (U.S.)

Formatted: English (U.S.)

Formatted: No underline, English (U.S.)

Formatted: No underline, English (U.S.)

Formatted: No underline, Swedish (Sweden)

Formatted: Swedish (Sweden)

1  
2  
3  
4  
5  
6  
7  
8  
9  
10  
11  
12  
13  
14  
15  
16  
17  
18  
19  
20  
21  
22  
23  
24  
25  
26  
27  
28  
29  
30  
31  
32  
33  
34  
35  
36  
37  
38  
39  
40  
41  
42  
43  
44  
45  
46  
47  
48  
49

31. Laursen TM, Munk-Olsen T, Agerbo E, et al. Somatic hospital contacts, invasive cardiac procedures, and mortality from heart disease in patients with severe mental disorder. *Arch Gen Psychiatry* 2009;66(7):713-20.

32. Manderbacka K, Arffman M, Sund R, et al. How does a history of psychiatric hospital care influence access to coronary care: a cohort study. *BMJ Open*;2(2):e000831.

33. Adler M, Backlund L, Edman G, et al. Symptoms and treatment of bipolar patients in Sweden. *Int J Psychiatry Clin Pract*;16(3):170-7.

Formatted: No underline, Swedish (Sweden)

Formatted: Swedish (Sweden)

Formatted: No underline, English (U.S.)

1  
2  
3  
4  
5  
6  
7  
8  
9  
10  
11  
12  
13  
14  
15  
16  
17  
18  
19  
20  
21  
22  
23  
24  
25  
26  
27  
28  
29  
30  
31  
32  
33  
34  
35  
36  
37  
38  
39  
40  
41  
42  
43  
44  
45  
46  
47  
48  
49  
50  
51  
52  
53  
54  
55  
56  
57  
58  
59  
60

For peer review only

Our manuscript have been checked towards the STROBE Statement.

STROBE Statement—Checklist of items that should be included in reports of *cohort studies* -

|                              | Item No | Recommendation                                                                                                                                                                                                                                                                                                         |
|------------------------------|---------|------------------------------------------------------------------------------------------------------------------------------------------------------------------------------------------------------------------------------------------------------------------------------------------------------------------------|
| <b>Title and abstract</b>    | 1       | (a) Indicate the study's design with a commonly used term in the title or the abstract<br>(b) Provide in the abstract an informative and balanced summary of what was done and what was found                                                                                                                          |
| <b>Introduction</b>          |         |                                                                                                                                                                                                                                                                                                                        |
| Background/rationale         | 2       | Explain the scientific background and rationale for the investigation being reported                                                                                                                                                                                                                                   |
| Objectives                   | 3       | State specific objectives, including any prespecified hypotheses                                                                                                                                                                                                                                                       |
| <b>Methods</b>               |         |                                                                                                                                                                                                                                                                                                                        |
| Study design                 | 4       | Present key elements of study design early in the paper                                                                                                                                                                                                                                                                |
| Setting                      | 5       | Describe the setting, locations, and relevant dates, including periods of recruitment, exposure, follow-up, and data collection                                                                                                                                                                                        |
| Participants                 | 6       | (a) Give the eligibility criteria, and the sources and methods of selection of participants. Describe methods of follow-up<br>(b) For matched studies, give matching criteria and number of exposed and unexposed                                                                                                      |
| Variables                    | 7       | Clearly define all outcomes, exposures, predictors, potential confounders, and effect modifiers. Give diagnostic criteria, if applicable                                                                                                                                                                               |
| Data sources/<br>measurement | 8*      | For each variable of interest, give sources of data and details of methods of assessment (measurement). Describe comparability of assessment methods if there is more than one group                                                                                                                                   |
| Bias                         | 9       | Describe any efforts to address potential sources of bias                                                                                                                                                                                                                                                              |
| Study size                   | 10      | Explain how the study size was arrived at                                                                                                                                                                                                                                                                              |
| Quantitative variables       | 11      | Explain how quantitative variables were handled in the analyses. If applicable, describe which groupings were chosen and why                                                                                                                                                                                           |
| Statistical methods          | 12      | (a) Describe all statistical methods, including those used to control for confounding<br>(b) Describe any methods used to examine subgroups and interactions<br>(c) Explain how missing data were addressed<br>(d) If applicable, explain how loss to follow-up was addressed<br>(e) Describe any sensitivity analyses |
| <b>Results</b>               |         |                                                                                                                                                                                                                                                                                                                        |
| Participants                 | 13*     | (a) Report numbers of individuals at each stage of study—eg numbers potentially eligible, examined for eligibility, confirmed eligible, included in the study, completing follow-up, and analysed<br>(b) Give reasons for non-participation at each stage<br>(c) Consider use of a flow diagram                        |
| Descriptive data             | 14*     | (a) Give characteristics of study participants (eg demographic, clinical, social) and information on exposures and potential confounders<br>(b) Indicate number of participants with missing data for each variable of interest<br>(c) Summarise follow-up time (eg, average and total amount)                         |
| Outcome data                 | 15*     | Report numbers of outcome events or summary measures over time                                                                                                                                                                                                                                                         |
| Main results                 | 16      | (a) Give unadjusted estimates and, if applicable, confounder-adjusted estimates and their precision (eg, 95% confidence interval). Make clear which confounders were                                                                                                                                                   |

|                          |    |                                                                                                                                                                            |
|--------------------------|----|----------------------------------------------------------------------------------------------------------------------------------------------------------------------------|
|                          |    | adjusted for and why they were included                                                                                                                                    |
|                          |    | (b) Report category boundaries when continuous variables were categorized                                                                                                  |
|                          |    | (c) If relevant, consider translating estimates of relative risk into absolute risk for a meaningful time period                                                           |
| Other analyses           | 17 | Report other analyses done—eg analyses of subgroups and interactions, and sensitivity analyses                                                                             |
| <b>Discussion</b>        |    |                                                                                                                                                                            |
| Key results              | 18 | Summarise key results with reference to study objectives                                                                                                                   |
| Limitations              | 19 | Discuss limitations of the study, taking into account sources of potential bias or imprecision. Discuss both direction and magnitude of any potential bias                 |
| Interpretation           | 20 | Give a cautious overall interpretation of results considering objectives, limitations, multiplicity of analyses, results from similar studies, and other relevant evidence |
| Generalisability         | 21 | Discuss the generalisability (external validity) of the study results                                                                                                      |
| <b>Other information</b> |    |                                                                                                                                                                            |
| Funding                  | 22 | Give the source of funding and the role of the funders for the present study and, if applicable, for the original study on which the present article is based              |

\*Give information separately for exposed and unexposed groups.

**Note:** An Explanation and Elaboration article discusses each checklist item and gives methodological background and published examples of transparent reporting. The STROBE checklist is best used in conjunction with this article (freely available on the Web sites of PLoS Medicine at <http://www.plosmedicine.org/>, Annals of Internal Medicine at <http://www.annals.org/>, and Epidemiology at <http://www.epidem.com/>). Information on the STROBE Initiative is available at <http://www.strobe-statement.org>.
